# Supplementary material for: Mismatch Repair Protein Msh2 Is Necessary for Macronuclear Stability and Micronuclear Division in Tetrahymena thermophila
Source: MDPI journal article supplement (doi:10.3390/ijms241310559), 2023-06-23
Supplement: s1 [file s1]

## Supplementary Information

**Table S1.** MutS protein in *T.thermophila*.

| Sequences producing significant alignments: |                                                                   | Score (bits) | E Value              |
|---------------------------------------------|-------------------------------------------------------------------|--------------|----------------------|
| TTHERM_00295920                             | <b>Msh2</b> DNA mismatch repair MutS family<br>DNA-binding domain | 462          | $1 \times 10^{-130}$ |
| TTHERM_00150000                             | DNA mismatch repair MutS family<br>DNA-binding domain             | 199          | $8 \times 10^{-51}$  |
| TTHERM_00194810                             | <b>Msh6</b> MutS domain III protein                               | 196          | $6 \times 10^{-50}$  |
| TTHERM_00426230                             | <b>Msh3</b> DNA mismatch repair MutS family<br>ATPase domain      | 177          | $5 \times 10^{-44}$  |
| TTHERM_00142230                             | MutS domain III protein                                           | 174          | $3 \times 10^{-43}$  |
| TTHERM_00857890                             | MutS domain II family protein                                     | 96           | $2 \times 10^{-19}$  |
| TTHERM_00763040                             | MutS domain V protein                                             | 70           | $7 \times 10^{-12}$  |

**Table S2.** Similarity comparison of MutS homologs of *T.thermophila*.

|                        | Msh2<br>(00295920) | Msh6<br>(00194810) | Msh6L3<br>(00150000) | Msh3/6L1<br>(00426230) | Msh3L1<br>(00142230) | Msh4<br>(00857890) |
|------------------------|--------------------|--------------------|----------------------|------------------------|----------------------|--------------------|
| Msh6<br>(00194810)     | 14.89%             |                    |                      |                        |                      |                    |
| Msh6L3<br>(00150000)   | 13.00%             | 23.79%             |                      |                        |                      |                    |
| Msh3/6L1<br>(00426230) | 15.62%             | 34.07%             | 21.39%               |                        |                      |                    |
| Msh3L1<br>(00142230)   | 12.34%             | 27.06%             | 23.02%               | 25.61%                 |                      |                    |
| Msh4<br>(00857890)     | 8.58%              | 11.13%             | 13.35%               | 10.73%                 | 12.27%               |                    |
| Msh5<br>(00763040)     | 11.01%             | 11.85%             | 10.87%               | 10.23%                 | 12.93%               | 10.92%             |

**Table S3.** Primer sequences used in the study

| Primer name                 | Primer sequences                                                                                    |
|-----------------------------|-----------------------------------------------------------------------------------------------------|
| <i>MSH2</i> -5F             | GAGCTCAACTCAGCCACTCGTCCATATGTC                                                                      |
| <i>MSH2</i> -5R             | GCGGCCGCAGATTTTAAAGCAGAAATAATTTTTTATTTTA                                                            |
| <i>MSH2</i> -3F             | CTCGAGTCATATTTTAAATATATTTTTTTTGGGAG                                                                 |
| <i>MSH2</i> -3R             | GGTACCAACTTAATTTATAGTTATAAAATAAATAAATAG                                                             |
| <i>MSH2</i> -MPF            | AAAACCAAAGCTCGGATTAATAATTTTG                                                                        |
| <i>MSH2</i> -MPR            | CAAAATTTTAATCCGAGCTTTGGTTTT                                                                         |
| <i>MSH2</i> -KO-5F          | CTAGAACTAGTGGATCCATAATGTATTTTATTAAGTTAATGATTG<br>GC                                                 |
| <i>MSH2</i> -KO-5R          | GGTACCCGGGGGATCGAGAACCTAGATTTATTTATAATTGTATG<br>CGATACCGTCGACCTCGATCATATTTTAAATATATTTTTTTTGGGA<br>G |
| <i>MSH2</i> -KO-3F          | CCGGGCCCCCCTCGAGCAGAGTAATTCATAGGTTATCAAATAC<br>AAAT                                                 |
| <i>interfer-MSH2</i> -3'F   | CTGCAGTTATTAGATAAGTTGCCATATGCGTTC                                                                   |
| <i>interfer-MSH2</i> -3'R   | CCCGGGCTAAAGTTTCTGCAACAAACAAACCAT                                                                   |
| <i>interfer-MSH2</i> -5'F   | GGATCCTTATTAGATAAGTTGCCATATGCGTTC                                                                   |
| <i>interfer-MSH2</i> -5'R   | GTTTAAACCTAAAGTTTCTGCAACAAACAAACCAT                                                                 |
| <i>MSH2</i> -3HA-Identify-F | GTTGTTGATCTTGCTTCTCCTATAATG                                                                         |
| KO- <i>MSH2</i> -iF         | TAAACCTTAATTTAGAATATTTATTAGGC                                                                       |
| KO- <i>MSH2</i> -iR         | GGAGAAGTACTAAAATGATTTTGAATA                                                                         |
| <i>MSH2</i> -3HA-Identify-R | AAGTTCCTCCTAAGATGTGAATAGTG                                                                          |
| <i>msh2i</i> -iden-F1       | GACATTAATGTGAAAGAAAAGGATAAG                                                                         |
| <i>msh2i</i> -iden-R1       | TAGACAGTTATAAATCACCTACAATAC                                                                         |
| 17S-F                       | CCTGGGAAGGTACGGGTAAT                                                                                |
| 17S-R                       | AAGGTTCAACGACCATTCG                                                                                 |

**Table S4.** CO-IP-MS data for Msh2-3HA-interacting proteins

| Gene Model Identifier  | iBAQ<br>MSH2_HA | iBAQ WT       | iBAQ WT/iBAQ<br>MSH2_HA |
|------------------------|-----------------|---------------|-------------------------|
| TTHERM_00241700        | 1206.9          | 0             | 0                       |
| TTHERM_00765280        | 952.43          | 0             | 0                       |
| TTHERM_00564530        | 49.613          | 0             | 0                       |
| TTHERM_00558350        | 2812.2          | 0             | 0                       |
| TTHERM_00723640        | 40.276          | 0             | 0                       |
| TTHERM_00151470        | 2542.9          | 0             | 0                       |
| TTHERM_00522600        | 544.41          | 0             | 0                       |
| TTHERM_01276420        | 19.225          | 0             | 0                       |
| TTHERM_01015890        | 12.907          | 0             | 0                       |
| TTHERM_00101330        | 579.14          | 0             | 0                       |
| TTHERM_00772030        | 319.3           | 0             | 0                       |
| TTHERM_00043890        | 450.46          | 0             | 0                       |
| TTHERM_00621340        | 867.74          | 0             | 0                       |
| TTHERM_00463450        | 583.79          | 0             | 0                       |
| TTHERM_00849320        | 2393.5          | 0             | 0                       |
| TTHERM_00387080        | 21.114          | 0             | 0                       |
| TTHERM_00622710        | 1214.4          | 0             | 0                       |
| TTHERM_00245100        | 98.361          | 0             | 0                       |
| TTHERM_00969600        | 204.98          | 0             | 0                       |
| TTHERM_00295920        | 306550          | 289.87        | 0.000945588             |
| TTHERM_00850620        | 38162           | 346.68        | 0.00908443              |
| TTHERM_00194810        | 94985           | 1504.7        | 0.015841449             |
| TTHERM_00150000        | 104330          | 3084.8        | 0.029567718             |
| <b>TTHERM_00537060</b> | <b>2318.8</b>   | <b>110.39</b> | <b>0.047606521</b>      |
| TTHERM_00600480        | 347.4           | 36.242        | 0.104323546             |
| TTHERM_00773310        | 24029           | 3200.7        | 0.133201548             |
| TTHERM_000088159       | 5947.4          | 844.97        | 0.142073847             |
| ...                    | ...             | ...           | ...                     |
| TTHERM_00648930        | 325.41          | 8961.6        | 27.53941182             |
| TTHERM_00992830        | 5264.5          | 2100800       | 399.0502422             |
| TTHERM_00151488        | 93.05           | 52126         | 560.1934444             |

The threshold value of iBAQ WT/iBAQ MSH2\_HA is 0.05.

**Table S5.** qRT-PCR results for relative expression profiles of the *MSH2* gene

| Sample | Expression | Expression SEM | Mean Cq | Cq SEM  |
|--------|------------|----------------|---------|---------|
| Lh     | 0.4211     | 0.44712        | 33.77   | 1.53024 |
| S0     | 1          | 0.0924         | 33.3    | 0.09657 |
| C0     | 0.63151    | 0.40618        | 34.72   | 0.92725 |
| C2     | 34.65898   | 10.92061       | 28.15   | 0.44249 |
| C4     | 2.31211    | 1.72942        | 27.94   | 1.01445 |
| C6     | 1.93963    | 0.15007        | 27.73   | 0.10442 |
| C8     | 0.39387    | 0.03013        | 35.22   | 0       |
| C10    | 0.36307    | 0.40396        | 35.88   | 0.43469 |
| C12    | 0.59112    | 0.11139        | 33.08   | 0.18339 |
| C16    | 0.86975    | 0.28795        | 33.02   | 0.47214 |
| C18    | 0.12501    | 0.17756        | 35.84   | 2.04689 |

**Table S6.** qRT-PCR results for relative expression of *MSH2* in *msh2i* cells

| Sample                | Expression | Expression SEM | Mean Cq | Cq SEM  |
|-----------------------|------------|----------------|---------|---------|
| WT                    | 1          | 0.09484        | 33.15   | 0.09462 |
| i- <i>MSH2</i> -B2086 | 0.53937    | 0.03729        | 34.18   | 0.08807 |
| i- <i>MSH2</i> -CU428 | 0.35041    | 0.04271        | 35.26   | 0.17408 |

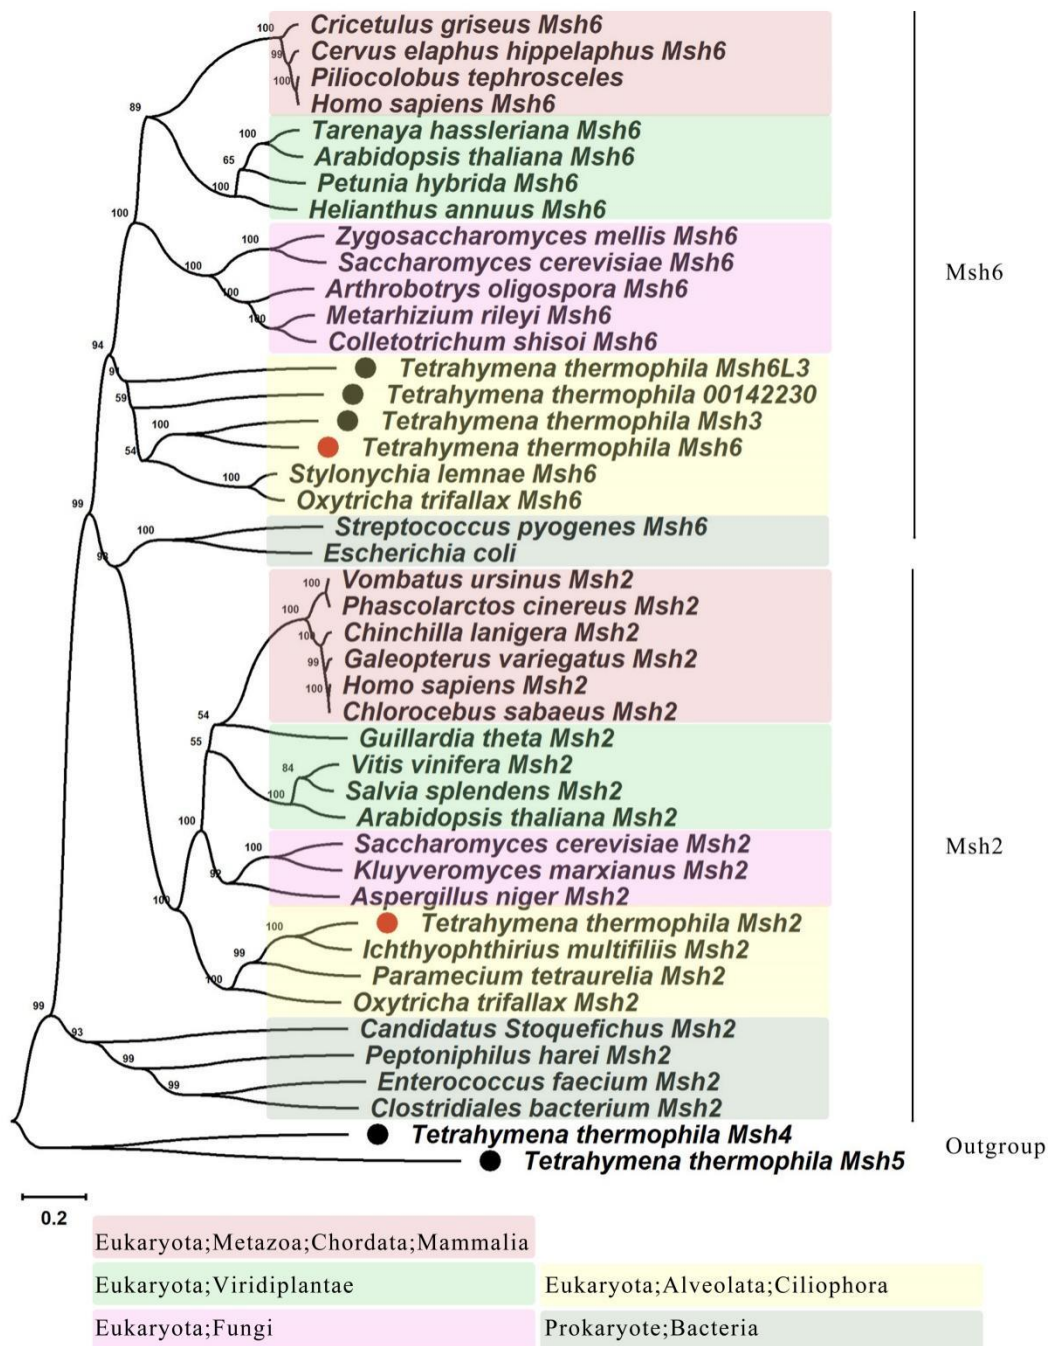

**Supplementary Figure S1.** Phylogenetic tree based on amino acid sequences of Msh2 and Msh6 from different species. Scale bar indicates genetic distance.

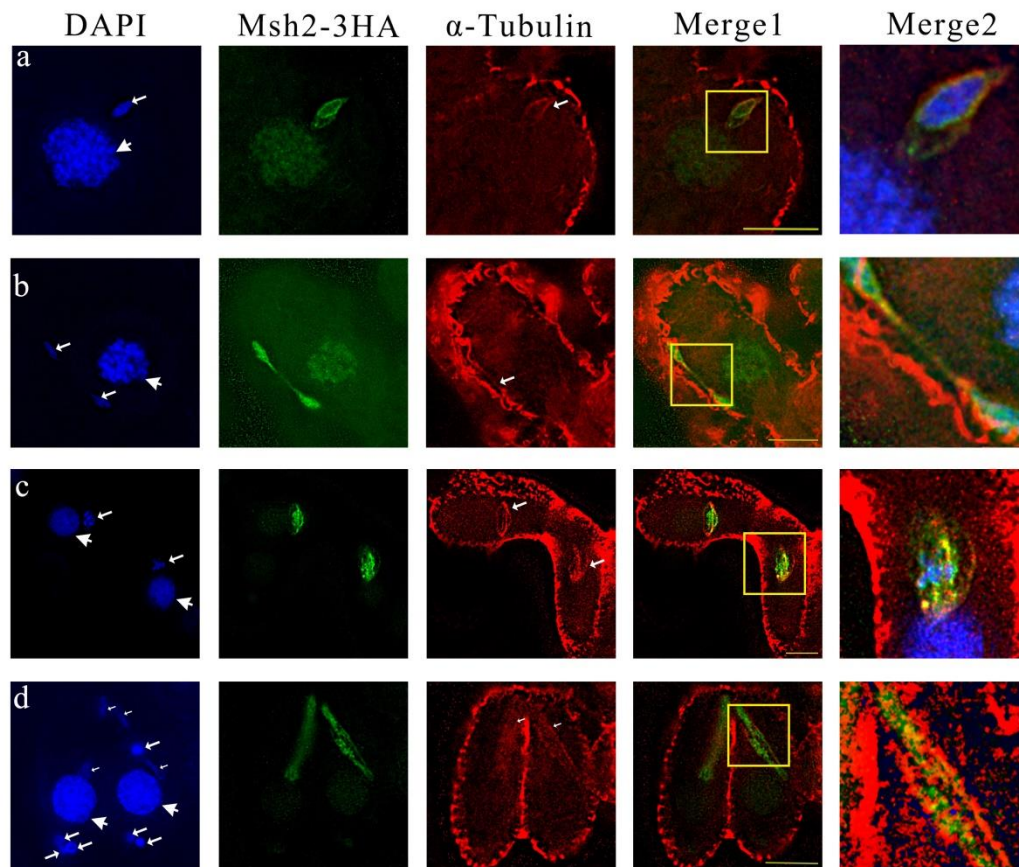

**Supplementary Figure S2.** Co-localization of Msh2-3HA and  $\alpha$ -tubulin during vegetative proliferation and conjugation of *Tetrahymena*. The arrow with the larger head indicates the position of the MAC, and the arrow with the smaller head indicates the position of the MIC. Merge2 is a triple magnification of the yellow box in Merge1, incorporating DAPI, Msh2-3HA and  $\alpha$ -tubulin. The scale bar is 10  $\mu$ m.

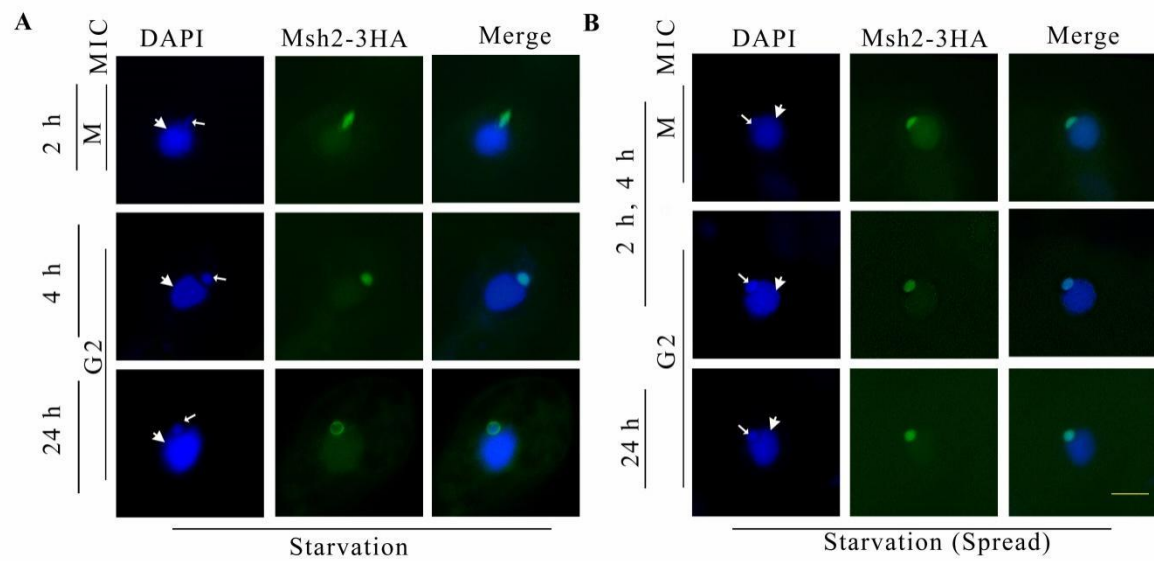

**Figure S3.** Msh2-3HA bound tightly to MIC and MAC chromatin during starvation. **(A)** Immunofluorescence localization of Msh2-3HA; **(B)** Localization of Msh2-3HA on chromatin in spread cells. DAPI stains the nuclei blue, and the localization signal of Msh2-3HA is localized by indirect immunofluorescence via HA tagging (green). The arrow with the larger head indicates the position of the MAC, and the arrow with the smaller head indicates the position of MIC. The scale bar is 10  $\mu\text{m}$ .

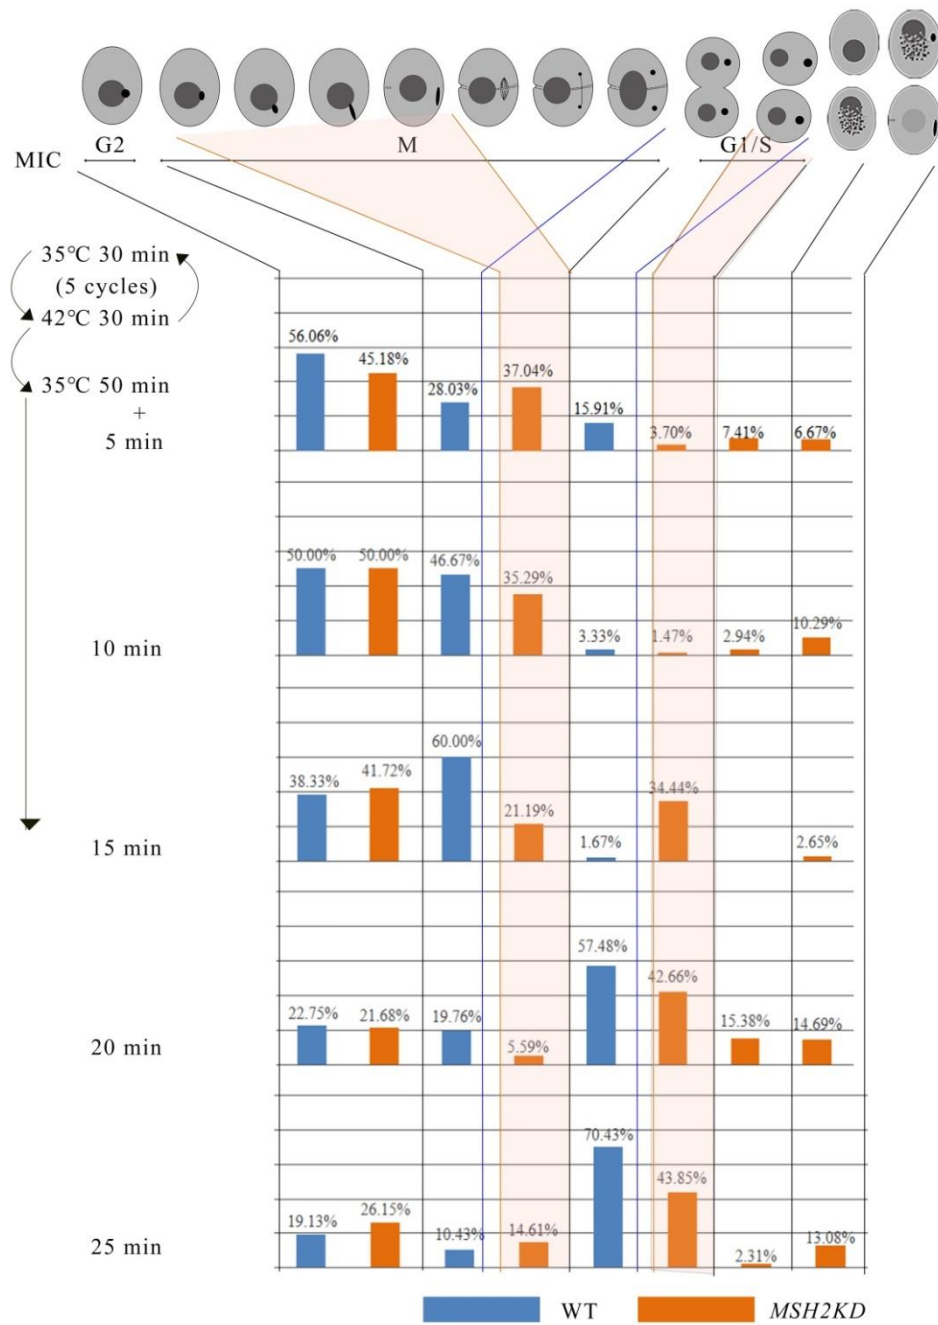

**Figure S4.** Knockdown of *MSH2* affected nuclear division during vegetative proliferation in *T. thermophila*. Nuclear development statistics of the micronucleus of the *MSH2KD* mutant cell line and wild-type control cells after synchronization during vegetative proliferation. The number of cells counted was greater than 120 cells, for each time point, for each cell line. The topmost part of the diagram shows a diagram of the cell development model.





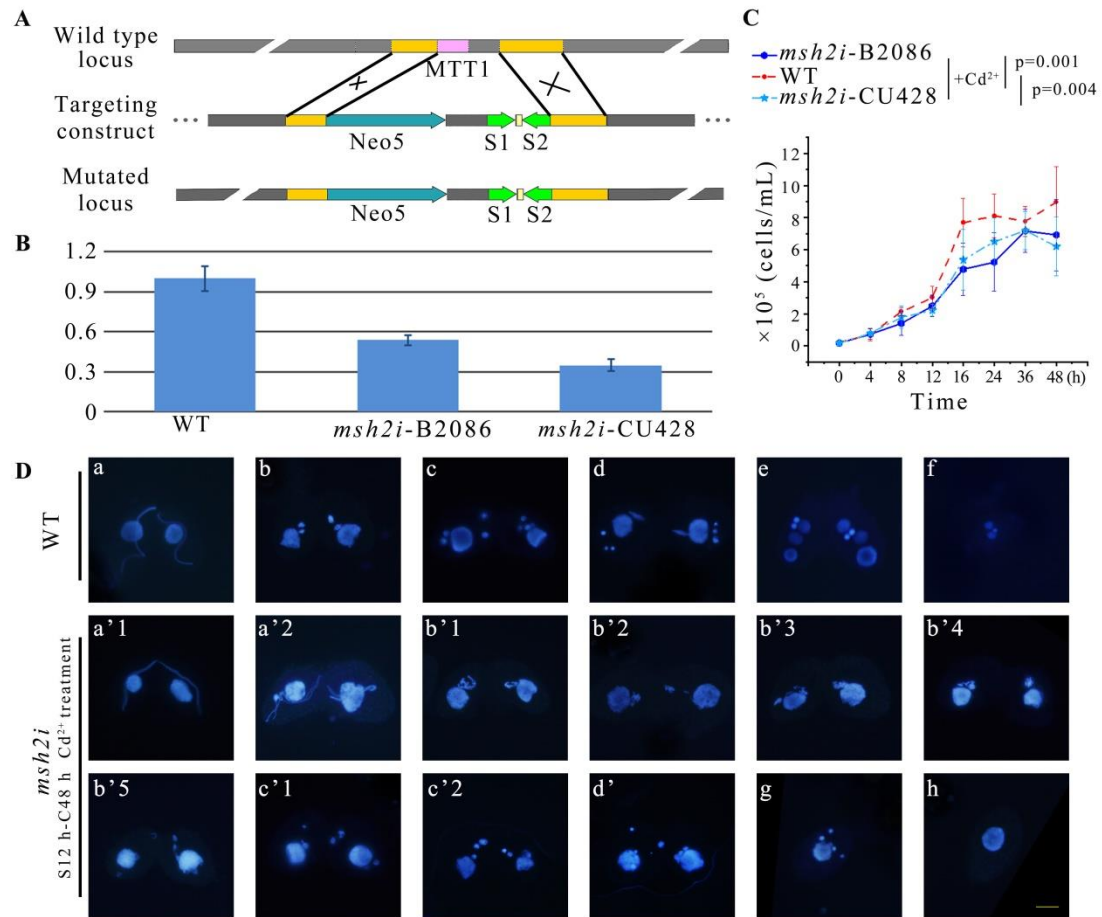

**Figure S6.** Effect of the knockdown of *MSH2* on nuclear division during conjugation in *Tetrahymena* independent of the accumulation of cellular abnormalities during vegetative proliferation. (A) Schematic representation for generating recombinant *msh2i* mutants in *T. thermophile*; (B, C) *msh2i* cells showed a significant decrease in *MSH2* expression and proliferation capacity; (D) Nuclear morphology of *msh2i* mutant and wild-type cells after Cd<sup>2+</sup> induction which was added at late starvation and during conjugation. DAPI stains the nuclei blue. Scale bar is 10 μm. DAPI stains the nuclei blue.

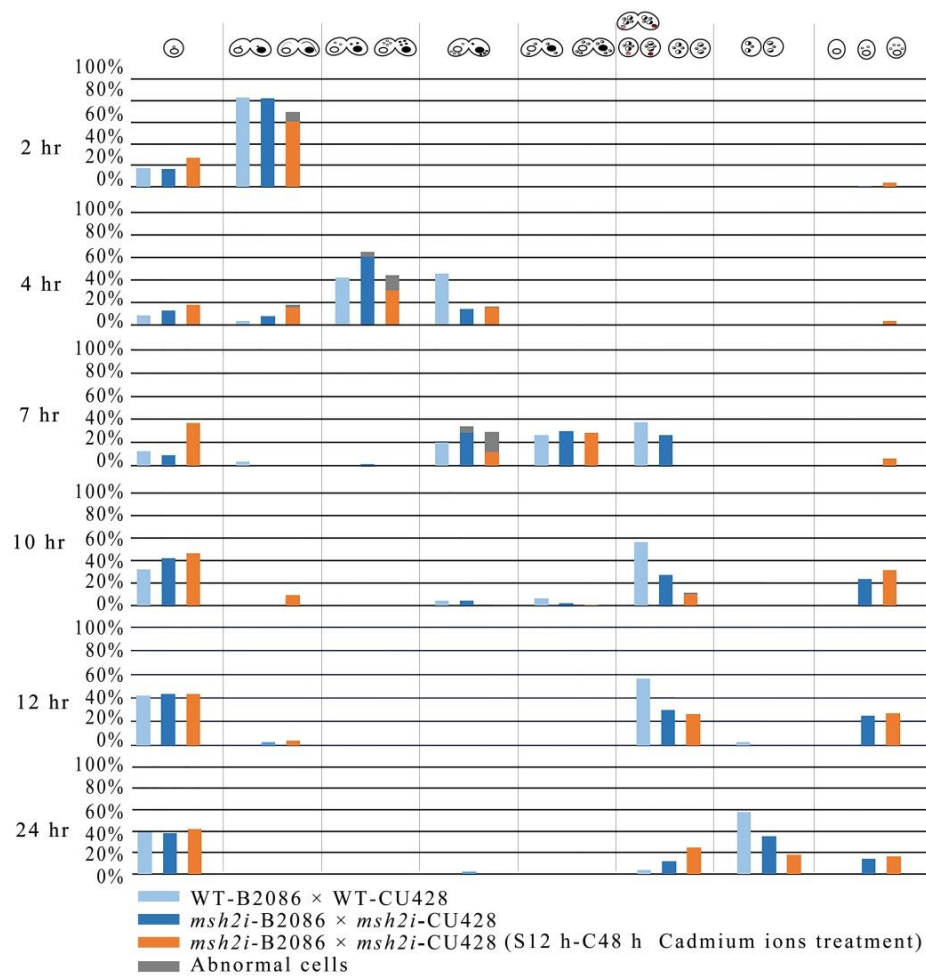

**Supplementary Figure S7.** Nuclear development statistics of the *msh2i* mutant cell line after  $\text{Cd}^{2+}$  induction which was added at late starvation and during conjugation. The number of cells counted was greater than 300 cells, for each time point, for each kind of paired cell. The topmost part of the diagram shows a diagram of the cell development model.
