# Supplementary material for: Mismatch Repair Protein Msh2 Is Necessary for Macronuclear Stability and Micronuclear Division in Tetrahymena thermophila
Source: Int J Mol Sci. 2023 Jun 23;24(13):10559. doi: 10.3390/ijms241310559 (PMC10342086; doi:10.3390/ijms241310559)
Supplement: Supplementary file 1 [file ijms-24-10559-s001.zip › ijms-Msh2-Supplementary File2.xlsx]

## Sheet: proteinGroups
Protein IDs	Fasta headers	Number of proteins	Peptides	Razor + unique peptides	Unique peptides	Sequence coverage [%]	Mol. weight [kDa]	Intensity	Intensity MSH2_HA	Intensity WT	iBAQ	iBAQ MSH2_HA	iBAQ WT	Reverse	Potential contaminant
sp|A0PGB3|SKP1_TETTS	sp|A0PGB3|SKP1_TETTS S-phase kinase-associated protein 1 homolog OS=Tetrahymena thermophila (strain SB210) OX=312017 GN=SKP1 PE=2 SV=1	1	2	2	2	21.1	18.972	87720	3366.9	84353	9746.7	374.1	9372.6
sp|O43952|TGP1_TETTH;tr|I7M314|I7M314_TETTS	sp|O43952|TGP1_TETTH G-quartet DNA-binding protein TGP1 OS=Tetrahymena thermophila OX=5911 GN=TGP1 PE=1 SV=1;tr|I7M314|I7M314_TETTS G-quartet DNA-binding protein TGP1 OS=Tetrahymena thermophila (strain SB210) OX=312017 GN=TTHERM_00499420 PE=4 SV=1	2	8	8	8	14.5	83.211	528840	250350	69106	13221	6258.8	1727.6
tr|I7MK14|I7MK14_TETTS;sp|O96774|RL3_TETTH	tr|I7MK14|I7MK14_TETTS 60S ribosomal protein L3, putative OS=Tetrahymena thermophila (strain SB210) OX=312017 GN=TTHERM_00497880 PE=3 SV=1;sp|O96774|RL3_TETTH Ribosomal protein L3 OS=Tetrahymena thermophila OX=5911 GN=RPL3 PE=1 SV=1	2	3	3	3	12.5	44.248	316200	35287	96504	14373	1603.9	4386.5
sp|P35065|H2A1_TETTS;sp|P35064|H2AX_TETTS;sp|P08992|H2AV_TETTS	sp|P35065|H2A1_TETTS Histone H2A.1 OS=Tetrahymena thermophila (strain SB210) OX=312017 GN=HTA2 PE=1 SV=2;sp|P35064|H2AX_TETTS Histone H2AX OS=Tetrahymena thermophila (strain SB210) OX=312017 GN=HTA1 PE=1 SV=2;sp|P08992|H2AV_TETTS Histone H2A.Z OS=Tetrahyme	3	1	1	1	6.8	14.283	307670	106440	92914	61534	21288	18583
sp|P08994|H2B2_TETTS;sp|P08993|H2B1_TETTS	sp|P08994|H2B2_TETTS Histone H2B.2 OS=Tetrahymena thermophila (strain SB210) OX=312017 GN=HTB2 PE=1 SV=2;sp|P08993|H2B1_TETTS Histone H2B.1 OS=Tetrahymena thermophila (strain SB210) OX=312017 GN=HTB1 PE=1 SV=2	2	2	2	2	19.7	13.635	216300	71892	23463	27037	8986.5	2932.8
sp|P09226|CB25_TETTH;tr|I7M0G1|I7M0G1_TETTS	sp|P09226|CB25_TETTH 25 kDa calcium-binding protein OS=Tetrahymena thermophila OX=5911 PE=1 SV=2;tr|I7M0G1|I7M0G1_TETTS 25 kDa calcium-binding protein OS=Tetrahymena thermophila (strain SB210) OX=312017 GN=TTHERM_00068170 PE=4 SV=2	2	1	1	1	7.8	24.703	34294	0	15100	2857.9	0	1258.4
tr|Q22G42|Q22G42_TETTS;sp|P0DJ13|RL7_TETTH	tr|Q22G42|Q22G42_TETTS 60S ribosomal protein L7 OS=Tetrahymena thermophila (strain SB210) OX=312017 GN=TTHERM_00721150 PE=3 SV=2;sp|P0DJ13|RL7_TETTH 60S ribosomal protein L7 OS=Tetrahymena thermophila OX=5911 GN=RPL7 PE=1 SV=1	2	6	6	6	26.8	27.614	1330600	276390	305000	102350	21261	23462
tr|I7LZH1|I7LZH1_TETTS;sp|P0DJ14|RL7A_TETTH	tr|I7LZH1|I7LZH1_TETTS 60S ribosomal protein L7a OS=Tetrahymena thermophila (strain SB210) OX=312017 GN=TTHERM_00773340 PE=3 SV=2;sp|P0DJ14|RL7A_TETTH 60S ribosomal protein L7a OS=Tetrahymena thermophila OX=5911 GN=RPL7A PE=1 SV=1	2	6	6	6	25.9	29.069	1841800	342940	453620	131560	24495	32401
sp|P0DJ15|RL13A_TETTS;tr|Q245E7|Q245E7_TETTS	sp|P0DJ15|RL13A_TETTS 60S ribosomal protein L13a OS=Tetrahymena thermophila (strain SB210) OX=312017 GN=RPL13A PE=1 SV=1;tr|Q245E7|Q245E7_TETTS 60S ribosomal protein L13/L16 OS=Tetrahymena thermophila (strain SB210) OX=312017 GN=TTHERM_00732640 PE=3 SV=2	2	2	2	2	11.6	22.592	831100	174080	204820	75555	15825	18620
tr|W7X3Z8|W7X3Z8_TETTS;sp|P0DJ16|RL17_TETTS	tr|W7X3Z8|W7X3Z8_TETTS 60S ribosomal protein L17 OS=Tetrahymena thermophila (strain SB210) OX=312017 GN=TTHERM_000339809 PE=3 SV=1;sp|P0DJ16|RL17_TETTS 60S ribosomal protein L17 OS=Tetrahymena thermophila (strain SB210) OX=312017 GN=RPL17 PE=1 SV=1	2	3	3	3	22.4	20.374	771650	121330	124770	85739	13481	13863
tr|W7X3Z3|W7X3Z3_TETTS;sp|P0DJ17|RL18_TETTH	tr|W7X3Z3|W7X3Z3_TETTS 60S ribosomal protein L18 OS=Tetrahymena thermophila (strain SB210) OX=312017 GN=TTHERM_000338239 PE=3 SV=1;sp|P0DJ17|RL18_TETTH 60S ribosomal protein L18 OS=Tetrahymena thermophila OX=5911 GN=RPL18 PE=1 SV=1	2	1	1	1	8.3	20.589	355570	69570	72023	32324	6324.6	6547.6
sp|P0DJ18|RL18A_TETTH;tr|I7MJR9|I7MJR9_TETTS	sp|P0DJ18|RL18A_TETTH 60S ribosomal protein L18a OS=Tetrahymena thermophila OX=5911 GN=RPL18A PE=1 SV=1;tr|I7MJR9|I7MJR9_TETTS 60S ribosomal protein L18a OS=Tetrahymena thermophila (strain SB210) OX=312017 GN=TTHERM_00476670 PE=3 SV=2	2	5	5	5	33.3	21.977	3767600	1006800	1071700	342510	91524	97424
tr|I7MJ94|I7MJ94_TETTS;sp|P0DJ19|RL27_TETTH	tr|I7MJ94|I7MJ94_TETTS 60S ribosomal protein L27 OS=Tetrahymena thermophila (strain SB210) OX=312017 GN=TTHERM_00780960 PE=3 SV=2;sp|P0DJ19|RL27_TETTH 60S ribosomal protein L27 OS=Tetrahymena thermophila OX=5911 GN=RPL27 PE=1 SV=1	2	1	1	1	7.6	16.728	193680	27107	47151	38736	5421.5	9430.2
sp|P0DJ20|RL28_TETTH;tr|I7M6I4|I7M6I4_TETTS	sp|P0DJ20|RL28_TETTH 60S ribosomal protein L28 OS=Tetrahymena thermophila OX=5911 GN=RPL28 PE=1 SV=1;tr|I7M6I4|I7M6I4_TETTS 60S ribosomal protein L28 OS=Tetrahymena thermophila (strain SB210) OX=312017 GN=TTHERM_00487140 PE=4 SV=2	2	4	4	4	35.8	14.665	540120	141650	184070	90020	23609	30679
sp|P0DJ22|RL35A_TETTS	sp|P0DJ22|RL35A_TETTS 60S ribosomal protein L35a OS=Tetrahymena thermophila (strain SB210) OX=312017 GN=RPL35A PE=1 SV=1	1	3	3	3	31	12.628	278100	16415	100120	34762	2051.9	12515
sp|P0DJ25|RL40_TETTS;tr|I7MEQ7|I7MEQ7_TETTS;tr|I7MKE1|I7MKE1_TETTS;tr|I7MF07|I7MF07_TETTS;tr|I7M208|I7M208_TETTS;tr|W7XCK1|W7XCK1_TETTS;tr|W7XJ27|W7XJ27_TETTS;tr|Q23NQ7|Q23NQ7_TETTS;tr|I7LVH7|I7LVH7_TETTS;tr|Q235G7|Q235G7_TETTS;tr|P90616|P90616_TETTH;tr|I7MF06|I7MF06_TETTS;tr|I7LVH8|I7LVH8_TETTS;tr|I7M8I7|I7M8I7_TETTS;tr|Q236S8|Q236S8_TETTS	sp|P0DJ25|RL40_TETTS Ubiquitin-60S ribosomal protein L40 OS=Tetrahymena thermophila (strain SB210) OX=312017 GN=RPL40 PE=1 SV=1;tr|I7MEQ7|I7MEQ7_TETTS Ubiquitin OS=Tetrahymena thermophila (strain SB210) OX=312017 GN=TTHERM_00339620 PE=3 SV=1;tr|I7MKE1|I7MK	15	2	2	2	14	14.57	1146600	334460	378860	191110	55744	63143
sp|P0DJ51|RL35_TETTS	sp|P0DJ51|RL35_TETTS 60S ribosomal protein L35 OS=Tetrahymena thermophila (strain SB210) OX=312017 GN=RPL35 PE=1 SV=1	1	2	2	2	17.7	14.196	185400	14662	30137	37080	2932.3	6027.4
sp|P0DJ52|RL8_TETTS	sp|P0DJ52|RL8_TETTS 60S ribosomal protein L8 OS=Tetrahymena thermophila (strain SB210) OX=312017 GN=RPL8 PE=1 SV=1	1	2	2	2	8.7	28.649	691050	165560	93398	53158	12736	7184.4
sp|P0DJ53|RL23_TETTS	sp|P0DJ53|RL23_TETTS 60S ribosomal protein L23 OS=Tetrahymena thermophila (strain SB210) OX=312017 GN=RPL23 PE=1 SV=1	1	3	3	3	23.4	14.879	434700	88304	108470	48300	9811.6	12052
sp|P0DJ54|RL24_TETTS	sp|P0DJ54|RL24_TETTS 60S ribosomal protein L24 OS=Tetrahymena thermophila (strain SB210) OX=312017 GN=RPL24 PE=1 SV=1	1	1	1	1	7.6	18.053	228860	43140	55454	38144	7190	9242.4
sp|P0DJ55|RL4_TETTS	sp|P0DJ55|RL4_TETTS 60S ribosomal protein L4 OS=Tetrahymena thermophila (strain SB210) OX=312017 GN=RPL4 PE=1 SV=1	1	13	13	13	38	45.106	2047700	505660	507770	89029	21985	22077
sp|P0DJ56|RL6_TETTS	sp|P0DJ56|RL6_TETTS 60S ribosomal protein L6 OS=Tetrahymena thermophila (strain SB210) OX=312017 GN=RPL6 PE=1 SV=1	1	10	10	10	49.7	21.732	1566900	346660	338130	156690	34666	33813
sp|P0DJ57|RL23A_TETTS	sp|P0DJ57|RL23A_TETTS 60S ribosomal protein L23A OS=Tetrahymena thermophila (strain SB210) OX=312017 GN=RPL23A PE=1 SV=1	1	4	4	4	26.7	16.861	468960	69814	142870	93791	13963	28574
sp|P11873|HMGC_TETTH;tr|Q23QF5|Q23QF5_TETTS	sp|P11873|HMGC_TETTH High mobility group protein C OS=Tetrahymena thermophila OX=5911 PE=1 SV=1;tr|Q23QF5|Q23QF5_TETTS High mobility group (HMG) box protein OS=Tetrahymena thermophila (strain SB210) OX=312017 GN=TTHERM_00257230 PE=4 SV=2	2	1	1	1	11	11.678	52420	11494	14549	10484	2298.7	2909.8
tr|A4VDR4|A4VDR4_TETTS;sp|P16925|CNJC_TETTH	tr|A4VDR4|A4VDR4_TETTS Conjugation stage-specific protein OS=Tetrahymena thermophila (strain SB210) OX=312017 GN=TTHERM_00193849 PE=3 SV=1;sp|P16925|CNJC_TETTH Conjugation stage-specific protein OS=Tetrahymena thermophila OX=5911 GN=CNJC PE=2 SV=1	2	2	2	2	9.7	36.042	86920	29601	21519	4828.9	1644.5	1195.5
tr|I7MGC5|I7MGC5_TETTS;sp|P24118|CISY_TETTH	tr|I7MGC5|I7MGC5_TETTS Citrate synthase OS=Tetrahymena thermophila (strain SB210) OX=312017 GN=TTHERM_00529790 PE=3 SV=2;sp|P24118|CISY_TETTH Citrate synthase, mitochondrial OS=Tetrahymena thermophila OX=5911 PE=1 SV=1	2	5	5	5	13.9	52.575	368950	165970	105820	16041	7216.1	4600.8
tr|Q23A84|Q23A84_TETTS;sp|P24119|RL11_TETTH	tr|Q23A84|Q23A84_TETTS 60S ribosomal protein L11 OS=Tetrahymena thermophila (strain SB210) OX=312017 GN=TTHERM_00829380 PE=3 SV=1;sp|P24119|RL11_TETTH 60S ribosomal protein L11 OS=Tetrahymena thermophila OX=5911 GN=RPL11 PE=1 SV=1	2	1	1	1	6.4	19.718	914960	180740	230500	114370	22592	28812
tr|I7M9N6|I7M9N6_TETTS;sp|P41351|TBA_TETTH;tr|A0A0F7LH56|A0A0F7LH56_TETTH;tr|A0A0M3KKT1|A0A0M3KKT1_TETTH	tr|I7M9N6|I7M9N6_TETTS Tubulin alpha chain OS=Tetrahymena thermophila (strain SB210) OX=312017 GN=TTHERM_00558620 PE=3 SV=1;sp|P41351|TBA_TETTH Tubulin alpha chain OS=Tetrahymena thermophila OX=5911 PE=1 SV=1;tr|A0A0F7LH56|A0A0F7LH56_TETTH Tubulin alpha ch	4	16	16	16	49	49.587	43191000	15810000	11806000	2056700	752850	562200
tr|Q24B92|Q24B92_TETTS;sp|P41352|TBB_TETTH	tr|Q24B92|Q24B92_TETTS Tubulin beta chain OS=Tetrahymena thermophila (strain SB210) OX=312017 GN=TTHERM_00348510 PE=3 SV=1;sp|P41352|TBB_TETTH Tubulin beta chain OS=Tetrahymena thermophila OX=5911 GN=BTU1 PE=1 SV=1	2	22	22	20	58.2	49.57	112880000	41277000	29813000	5643800	2063800	1490700
tr|Q22R83|Q22R83_TETTS;sp|P41915|RAN_TETTH	tr|Q22R83|Q22R83_TETTS GTP-binding nuclear protein OS=Tetrahymena thermophila (strain SB210) OX=312017 GN=TTHERM_00023980 PE=3 SV=2;sp|P41915|RAN_TETTH GTP-binding nuclear protein Ran OS=Tetrahymena thermophila OX=5911 PE=2 SV=1	2	6	6	6	34.2	25.649	1829200	816710	377020	152440	68059	31418
tr|Q24CJ7|Q24CJ7_TETTS;sp|P50313|PGK_TETTH	tr|Q24CJ7|Q24CJ7_TETTS Phosphoglycerate kinase OS=Tetrahymena thermophila (strain SB210) OX=312017 GN=TTHERM_00929450 PE=3 SV=1;sp|P50313|PGK_TETTH Phosphoglycerate kinase OS=Tetrahymena thermophila OX=5911 GN=PGK PE=2 SV=1	2	2	2	2	8.6	45.913	52842	34273	7842.1	1822.1	1181.8	270.42
sp|P69152|H4_TETTS	sp|P69152|H4_TETTS Histone H4 OS=Tetrahymena thermophila (strain SB210) OX=312017 GN=HHF1 PE=1 SV=2	1	1	1	1	11.7	11.328	128200	38209	54194	21367	6368.1	9032.3
sp|Q22AX5|RL9_TETTS	sp|Q22AX5|RL9_TETTS 60S ribosomal protein L9 OS=Tetrahymena thermophila (strain SB210) OX=312017 GN=RPL9 PE=1 SV=1	1	5	5	5	26.1	21.336	1343700	253120	347360	111970	21093	28947
sp|Q231U7|RL5_TETTS	sp|Q231U7|RL5_TETTS 60S ribosomal protein L5 OS=Tetrahymena thermophila (strain SB210) OX=312017 GN=RPL5 PE=1 SV=2	1	5	5	5	20.9	34.453	638160	119080	156190	53180	9923.5	13016
sp|Q235M8|RL10_TETTS	sp|Q235M8|RL10_TETTS 60S ribosomal protein L10 OS=Tetrahymena thermophila (strain SB210) OX=312017 GN=RPL10 PE=1 SV=1	1	3	3	3	18.6	24.458	456340	111750	93643	65191	15964	13378
sp|Q23BV5|RL22_TETTS	sp|Q23BV5|RL22_TETTS 60S ribosomal protein L22 OS=Tetrahymena thermophila (strain SB210) OX=312017 GN=RPL22 PE=1 SV=3	1	3	3	3	33.1	13.78	417770	71251	116390	69628	11875	19398
tr|E6PBR8|E6PBR8_TETTH;sp|Q23DE3|RS3A_TETTS	tr|E6PBR8|E6PBR8_TETTH 40S ribosomal protein S3a OS=Tetrahymena thermophila OX=5911 PE=1 SV=1;sp|Q23DE3|RS3A_TETTS 40S ribosomal protein S3a OS=Tetrahymena thermophila (strain SB210) OX=312017 GN=TTHERM_00047480 PE=1 SV=2	2	4	4	4	15.5	29.653	1984600	413600	542110	124040	25850	33882
sp|Q23G98|RL37A_TETTS	sp|Q23G98|RL37A_TETTS 60S ribosomal protein L37a OS=Tetrahymena thermophila (strain SB210) OX=312017 GN=RPL37A PE=1 SV=1	1	2	2	2	30.1	11.35	369570	71330	109220	73915	14266	21843
sp|Q24C27|RL14_TETTS	sp|Q24C27|RL14_TETTS 60S ribosomal protein L14 OS=Tetrahymena thermophila (strain SB210) OX=312017 GN=RPL14 PE=1 SV=2	1	2	2	2	16.7	14.598	834460	126750	200130	139080	21124	33355
tr|I7MFA3|I7MFA3_TETTS;sp|Q27200|FBRL_TETTH	tr|I7MFA3|I7MFA3_TETTS rRNA 2-O-methyltransferase fibrillarin OS=Tetrahymena thermophila (strain SB210) OX=312017 GN=TTHERM_00138080 PE=3 SV=1;sp|Q27200|FBRL_TETTH rRNA 2-O-methyltransferase fibrillarin OS=Tetrahymena thermophila OX=5911 GN=FIB PE=2 SV=2	2	1	1	1	6.5	31.288	62341	0	18306	3667.1	0	1076.8
tr|A0A0M3KKT2|A0A0M3KKT2_TETTH	tr|A0A0M3KKT2|A0A0M3KKT2_TETTH Tubulin beta chain OS=Tetrahymena thermophila OX=5911 PE=1 SV=1	1	3	1	1	9.2	49.86	11043	0	6221.4	552.16	0	311.07
tr|I7M0Z2|I7M0Z2_TETTS;tr|A0MNQ6|A0MNQ6_TETTH	tr|I7M0Z2|I7M0Z2_TETTS DNA mismatch repair MutS family DNA-binding domain protein, putative OS=Tetrahymena thermophila (strain SB210) OX=312017 GN=TTHERM_00295920 PE=4 SV=1;tr|A0MNQ6|A0MNQ6_TETTH Putative mismatch repair protein OS=Tetrahymena thermophila	2	28	28	28	41.2	93.154	14601000	13181000	12465	339560	306550	289.87
tr|A3F816|A3F816_TETTH;tr|Q236N8|Q236N8_TETTS	tr|A3F816|A3F816_TETTH Lia4p (Fragment) OS=Tetrahymena thermophila OX=5911 GN=LIA4 PE=2 SV=1;tr|Q236N8|Q236N8_TETTS Uncharacterized protein OS=Tetrahymena thermophila (strain SB210) OX=312017 GN=TTHERM_00085600 PE=4 SV=1	2	1	1	1	2.3	91.224	295790	0	42661	10564	0	1523.6
tr|A4VCZ5|A4VCZ5_TETTS	tr|A4VCZ5|A4VCZ5_TETTS WD_REPEATS_REGION domain-containing protein OS=Tetrahymena thermophila (strain SB210) OX=312017 GN=TTHERM_00659131 PE=3 SV=1	1	2	2	2	1.8	142.58	508500	474600	14301	7704.5	7191	216.69
tr|A4VD40|A4VD40_TETTS	tr|A4VD40|A4VD40_TETTS Importin N-terminal domain-containing protein OS=Tetrahymena thermophila (strain SB210) OX=312017 GN=TTHERM_00579319 PE=4 SV=1	1	1	1	1	1.2	125.71	11804	0	0	214.62	0	0
tr|E6PBS4|E6PBS4_TETTH;tr|A4VD76|A4VD76_TETTS	tr|E6PBS4|E6PBS4_TETTH 40S ribosomal protein rpS6e OS=Tetrahymena thermophila OX=5911 PE=1 SV=1;tr|A4VD76|A4VD76_TETTS 40S ribosomal protein S6 OS=Tetrahymena thermophila (strain SB210) OX=312017 GN=TTHERM_00149798 PE=1 SV=1	2	5	5	5	23.2	32.541	370340	21549	82822	26453	1539.2	5915.9
tr|A4VDF3|A4VDF3_TETTS	tr|A4VDF3|A4VDF3_TETTS ATP-dependent (S)-NAD(P)H-hydrate dehydratase OS=Tetrahymena thermophila (strain SB210) OX=312017 GN=TTHERM_00133729 PE=3 SV=1	1	2	2	2	5	43.405	29730	29730	0	1351.3	1351.3	0
tr|A4VDG8|A4VDG8_TETTS	tr|A4VDG8|A4VDG8_TETTS Cyclic nucleotide-binding domain protein OS=Tetrahymena thermophila (strain SB210) OX=312017 GN=TTHERM_00628569 PE=4 SV=2	1	1	1	1	0.8	151.86	182340	68606	21314	3376.7	1270.5	394.7
tr|A4VE40|A4VE40_TETTS	tr|A4VE40|A4VE40_TETTS Transmembrane amino acid transporter protein OS=Tetrahymena thermophila (strain SB210) OX=312017 GN=TTHERM_00405586 PE=4 SV=1	1	1	1	1	1.9	53.766	136420	6970.5	0	12402	633.69	0
tr|A9CBT7|A9CBT7_TETTH;tr|Q23R22|Q23R22_TETTS	tr|A9CBT7|A9CBT7_TETTH Dynein heavy chain 17 (Fragment) OS=Tetrahymena thermophila OX=5911 PE=4 SV=1;tr|Q23R22|Q23R22_TETTS Dynein heavy chain 7, axonemal protein OS=Tetrahymena thermophila (strain SB210) OX=312017 GN=TTHERM_00850620 PE=4 SV=2	2	1	1	1	2.1	133.82	2316900	2289700	20801	38615	38162	346.68
tr|W7XJ96|W7XJ96_TETTS;tr|B0FSU3|B0FSU3_TETTH	tr|W7XJ96|W7XJ96_TETTS Cytochrome P450 family monooxygenase OS=Tetrahymena thermophila (strain SB210) OX=312017 GN=TTHERM_000437538 PE=3 SV=1;tr|B0FSU3|B0FSU3_TETTH Cytochrome P450 monooxygenase CYP5013A1 OS=Tetrahymena thermophila OX=5911 GN=CYP PE=3 SV=1	2	1	1	1	2.4	57.976	41193	4700.3	8034.6	1791	204.36	349.33
tr|C0NA16|C0NA16_TETTS	tr|C0NA16|C0NA16_TETTS ABC transporter family protein OS=Tetrahymena thermophila (strain SB210) OX=312017 GN=TTHERM_00313119 PE=4 SV=1	1	1	1	1	1.7	82.711	61583	0	10071	1811.3	0	296.2
tr|C3VMW0|C3VMW0_TETTH;tr|Q24CV5|Q24CV5_TETTS	tr|C3VMW0|C3VMW0_TETTH 2-oxoglutarate/malate carrier OS=Tetrahymena thermophila OX=5911 PE=2 SV=1;tr|Q24CV5|Q24CV5_TETTS 2-oxoglutarate/malate carrier protein OS=Tetrahymena thermophila (strain SB210) OX=312017 GN=TTHERM_00713470 PE=3 SV=3	2	4	4	4	19.4	33.194	381730	118850	81791	20091	6255	4304.8
tr|I7LVR5|I7LVR5_TETTS;tr|D2KMS0|D2KMS0_TETTH	tr|I7LVR5|I7LVR5_TETTS Ubiquitin-like modifier-activating enzyme OS=Tetrahymena thermophila (strain SB210) OX=312017 GN=TTHERM_00138370 PE=4 SV=1;tr|D2KMS0|D2KMS0_TETTH ATG7-like protein OS=Tetrahymena thermophila OX=5911 GN=ATG7 PE=2 SV=1	2	4	4	4	7.6	76.269	201930	50966	63693	4589.4	1158.3	1447.6
tr|D3KYX7|D3KYX7_TETTH;tr|Q234T3|Q234T3_TETTS	tr|D3KYX7|D3KYX7_TETTH Nucleoporin gp210 OS=Tetrahymena thermophila OX=5911 GN=GP210 PE=2 SV=1;tr|Q234T3|Q234T3_TETTS Nucleoporin, putative OS=Tetrahymena thermophila (strain SB210) OX=312017 GN=TTHERM_00101160 PE=4 SV=2	2	6	6	6	3.7	218.98	185790	14751	4402.5	1976.5	156.92	46.835
tr|E1AWM3|E1AWM3_TETTH;tr|Q22YP6|Q22YP6_TETTS;tr|Q22YW0|Q22YW0_TETTS	tr|E1AWM3|E1AWM3_TETTH Vacuolar sorting protein 13A OS=Tetrahymena thermophila OX=5911 GN=VPS13A PE=2 SV=1;tr|Q22YP6|Q22YP6_TETTS PH domain protein OS=Tetrahymena thermophila (strain SB210) OX=312017 GN=TTHERM_00123750 PE=3 SV=2	3	18	18	17	6.7	398.16	744470	119560	219070	3939	632.59	1159.1
tr|I7ML31|I7ML31_TETTS;tr|E1CAY1|E1CAY1_TETTH	tr|I7ML31|I7ML31_TETTS Small guanosine triphosphatase family (GTPase)-like Ras family protein OS=Tetrahymena thermophila (strain SB210) OX=312017 GN=TTHERM_00316280 PE=4 SV=1;tr|E1CAY1|E1CAY1_TETTH Rab-family small GTPase Rab1A OS=Tetrahymena thermophila O	2	2	2	2	10.4	23.502	182570	41462	53227	12171	2764.1	3548.5
tr|I7LSW1|I7LSW1_TETTS;tr|E1CAY3|E1CAY3_TETTH	tr|I7LSW1|I7LSW1_TETTS Rab-family small GTPase OS=Tetrahymena thermophila (strain SB210) OX=312017 GN=TTHERM_00825210 PE=4 SV=1;tr|E1CAY3|E1CAY3_TETTH Rab-family small GTPase Rab1C OS=Tetrahymena thermophila OX=5911 GN=RAB1C PE=2 SV=1	2	1	1	1	6.7	24.016	2718.2	0	0	194.16	0	0
tr|I7MGB2|I7MGB2_TETTS;tr|E1CAZ5|E1CAZ5_TETTH	tr|I7MGB2|I7MGB2_TETTS Small guanosine triphosphatase family Ras family protein OS=Tetrahymena thermophila (strain SB210) OX=312017 GN=TTHERM_00149110 PE=4 SV=1;tr|E1CAZ5|E1CAZ5_TETTH Rab-family small GTPase Rab11E OS=Tetrahymena thermophila OX=5911 GN=RAB	2	4	4	4	26.7	23.409	116910	24409	20999	8350.7	1743.5	1500
tr|E1CB06|E1CB06_TETTH;tr|Q24CD0|Q24CD0_TETTS;tr|Q23FM5|Q23FM5_TETTS;tr|E1CB07|E1CB07_TETTH;tr|I7M435|I7M435_TETTS;tr|E1CB05|E1CB05_TETTH	tr|E1CB06|E1CB06_TETTH Rab-family small GTPase Rab6C OS=Tetrahymena thermophila OX=5911 GN=RAB6C PE=2 SV=1;tr|Q24CD0|Q24CD0_TETTS Rab-family small GTPase OS=Tetrahymena thermophila (strain SB210) OX=312017 GN=TTHERM_01079210 PE=4 SV=3;tr|Q23FM5|Q23FM5_TETT	6	1	1	1	4.9	24.906	66678	0	66678	4167.4	0	4167.4
tr|Q23K54|Q23K54_TETTS;tr|E5KKV6|E5KKV6_TETTH	tr|Q23K54|Q23K54_TETTS DNA mismatch repair protein OS=Tetrahymena thermophila (strain SB210) OX=312017 GN=TTHERM_00194810 PE=3 SV=1;tr|E5KKV6|E5KKV6_TETTH DNA mismatch repair protein OS=Tetrahymena thermophila OX=5911 GN=MSH6_1 PE=2 SV=1	2	40	40	40	38.5	142.36	9167200	5984000	94794	145510	94985	1504.7
tr|I7MGE9|I7MGE9_TETTS;tr|E5KKV7|E5KKV7_TETTH	tr|I7MGE9|I7MGE9_TETTS DNA mismatch repair protein OS=Tetrahymena thermophila (strain SB210) OX=312017 GN=TTHERM_00150000 PE=3 SV=2;tr|E5KKV7|E5KKV7_TETTH DNA mismatch repair protein OS=Tetrahymena thermophila OX=5911 GN=MSH6_4 PE=2 SV=1	2	32	32	32	27.1	161.12	8110300	7824400	231360	108140	104330	3084.8
tr|I7ME40|I7ME40_TETTS;tr|E6PBR9|E6PBR9_TETTH	tr|I7ME40|I7ME40_TETTS 40S ribosomal protein SA OS=Tetrahymena thermophila (strain SB210) OX=312017 GN=TTHERM_00522630 PE=3 SV=1;tr|E6PBR9|E6PBR9_TETTH 40S ribosomal protein SA OS=Tetrahymena thermophila OX=5911 PE=1 SV=1	2	2	2	2	12.9	27.498	149550	53781	38116	12463	4481.7	3176.4
tr|Q23KG1|Q23KG1_TETTS;tr|E6PBS0|E6PBS0_TETTH	tr|Q23KG1|Q23KG1_TETTS 40S ribosomal protein S2, putative OS=Tetrahymena thermophila (strain SB210) OX=312017 GN=TTHERM_00193740 PE=1 SV=3;tr|E6PBS0|E6PBS0_TETTH 40S ribosomal protein rpS2e OS=Tetrahymena thermophila OX=5911 PE=1 SV=1	2	1	1	1	4.4	33.679	182060	30382	41604	10710	1787.2	2447.3
tr|Q22AV9|Q22AV9_TETTS;tr|E6PBS1|E6PBS1_TETTH	tr|Q22AV9|Q22AV9_TETTS 40S ribosomal protein S3 OS=Tetrahymena thermophila (strain SB210) OX=312017 GN=TTHERM_01151500 PE=1 SV=3;tr|E6PBS1|E6PBS1_TETTH 40S ribosomal protein rpS3e OS=Tetrahymena thermophila OX=5911 PE=1 SV=1	2	9	9	9	46.5	27.531	2063400	392140	563050	137560	26143	37537
tr|I7M9C4|I7M9C4_TETTS;tr|E6PBS2|E6PBS2_TETTH;sp|P0C233|RS4_TETTH	tr|I7M9C4|I7M9C4_TETTS 40S ribosomal protein S4 OS=Tetrahymena thermophila (strain SB210) OX=312017 GN=TTHERM_00149300 PE=3 SV=2;tr|E6PBS2|E6PBS2_TETTH 40S ribosomal protein S4 OS=Tetrahymena thermophila OX=5911 PE=1 SV=1;sp|P0C233|RS4_TETTH 40S ribosomal	3	8	8	8	23.6	37.935	1346700	194400	463540	67333	9720.1	23177
tr|Q22WU7|Q22WU7_TETTS;tr|E6PBS3|E6PBS3_TETTH	tr|Q22WU7|Q22WU7_TETTS 40S ribosomal protein S5 OS=Tetrahymena thermophila (strain SB210) OX=312017 GN=TTHERM_01386050 PE=1 SV=1;tr|E6PBS3|E6PBS3_TETTH 40S ribosomal protein rpS5e OS=Tetrahymena thermophila OX=5911 PE=1 SV=1	2	7	7	7	41.5	22.476	1994800	356290	578940	153450	27407	44534
tr|I7MD19|I7MD19_TETTS;tr|E6PBS5|E6PBS5_TETTH	tr|I7MD19|I7MD19_TETTS 40S ribosomal protein S7 OS=Tetrahymena thermophila (strain SB210) OX=312017 GN=TTHERM_00471090 PE=1 SV=1;tr|E6PBS5|E6PBS5_TETTH 40S ribosomal protein S7 OS=Tetrahymena thermophila OX=5911 PE=1 SV=1	2	5	5	5	32	23.188	1469600	295740	343330	133600	26886	31212
tr|Q22AV0|Q22AV0_TETTS;tr|E6PBS6|E6PBS6_TETTH	tr|Q22AV0|Q22AV0_TETTS 40S ribosomal protein S8 OS=Tetrahymena thermophila (strain SB210) OX=312017 GN=TTHERM_01151600 PE=1 SV=1;tr|E6PBS6|E6PBS6_TETTH 40S ribosomal protein S8 OS=Tetrahymena thermophila OX=5911 PE=1 SV=1	2	5	5	5	25.5	24.193	554910	31994	141920	61657	3554.9	15769
tr|Q24F70|Q24F70_TETTS;tr|E6PBS8|E6PBS8_TETTH	tr|Q24F70|Q24F70_TETTS 40S ribosomal protein S10, putative OS=Tetrahymena thermophila (strain SB210) OX=312017 GN=TTHERM_01128560 PE=1 SV=1;tr|E6PBS8|E6PBS8_TETTH 40S ribosomal protein rpS10e OS=Tetrahymena thermophila OX=5911 PE=1 SV=1	2	2	2	2	13.6	18.583	628480	136230	207430	69831	15137	23048
tr|Q22B78|Q22B78_TETTS;tr|E6PBS9|E6PBS9_TETTH	tr|Q22B78|Q22B78_TETTS 40S ribosomal protein S11, putative OS=Tetrahymena thermophila (strain SB210) OX=312017 GN=TTHERM_01109770 PE=1 SV=1;tr|E6PBS9|E6PBS9_TETTH 40S ribosomal protein rpS11e OS=Tetrahymena thermophila OX=5911 PE=1 SV=1	2	3	3	3	17.2	18.108	189510	27037	50456	18951	2703.7	5045.6
tr|Q22W26|Q22W26_TETTS;tr|E6PBT0|E6PBT0_TETTH	tr|Q22W26|Q22W26_TETTS 40S ribosomal protein S12 OS=Tetrahymena thermophila (strain SB210) OX=312017 GN=TTHERM_00161060 PE=1 SV=1;tr|E6PBT0|E6PBT0_TETTH 40S ribosomal protein rpS12e OS=Tetrahymena thermophila OX=5911 PE=1 SV=1	2	1	1	1	10.3	13.81	66128	18278	0	8266.1	2284.8	0
tr|I7LXQ4|I7LXQ4_TETTS;tr|E6PBT2|E6PBT2_TETTH	tr|I7LXQ4|I7LXQ4_TETTS 40S ribosomal protein S14 OS=Tetrahymena thermophila (strain SB210) OX=312017 GN=TTHERM_00765300 PE=3 SV=1;tr|E6PBT2|E6PBT2_TETTH 40S ribosomal protein rpS14e OS=Tetrahymena thermophila OX=5911 PE=1 SV=1	2	3	3	3	29.8	16.374	506260	82488	143600	126570	20622	35900
tr|I7M173|I7M173_TETTS;tr|E6PBT3|E6PBT3_TETTH	tr|I7M173|I7M173_TETTS 40S ribosomal protein S15 OS=Tetrahymena thermophila (strain SB210) OX=312017 GN=TTHERM_00266390 PE=3 SV=1;tr|E6PBT3|E6PBT3_TETTH 40S ribosomal protein rpS15e OS=Tetrahymena thermophila OX=5911 PE=1 SV=1	2	4	4	4	44.4	15.873	600660	90286	103390	100110	15048	17232
tr|E6PBT4|E6PBT4_TETTH;tr|I7MHZ7|I7MHZ7_TETTS	tr|E6PBT4|E6PBT4_TETTH 40S ribosomal protein rpS16e OS=Tetrahymena thermophila OX=5911 PE=1 SV=1;tr|I7MHZ7|I7MHZ7_TETTS Ribosomal protein S9 OS=Tetrahymena thermophila (strain SB210) OX=312017 GN=TTHERM_00706300 PE=4 SV=1	2	5	5	5	39.3	16.388	643410	98396	184550	64341	9839.6	18455
tr|I7LVM3|I7LVM3_TETTS;tr|E6PBT6|E6PBT6_TETTH	tr|I7LVM3|I7LVM3_TETTS 40S ribosomal protein S18, putative OS=Tetrahymena thermophila (strain SB210) OX=312017 GN=TTHERM_00131110 PE=3 SV=1;tr|E6PBT6|E6PBT6_TETTH 40S ribosomal protein rpS18e OS=Tetrahymena thermophila OX=5911 PE=1 SV=1	2	4	4	4	33.5	17.765	790930	123260	212610	98866	15407	26577
tr|I7MFD1|I7MFD1_TETTS;tr|E6PBT7|E6PBT7_TETTH	tr|I7MFD1|I7MFD1_TETTS 40S ribosomal protein S19 OS=Tetrahymena thermophila (strain SB210) OX=312017 GN=TTHERM_00823670 PE=3 SV=1;tr|E6PBT7|E6PBT7_TETTH 40S ribosomal protein rpS19e OS=Tetrahymena thermophila OX=5911 PE=1 SV=1	2	4	4	4	30.3	17.739	854330	166360	222010	85433	16636	22201
tr|E6PBT8|E6PBT8_TETTH;tr|Q22DC6|Q22DC6_TETTS	tr|E6PBT8|E6PBT8_TETTH 40S ribosomal protein rpS20e OS=Tetrahymena thermophila OX=5911 PE=1 SV=1;tr|Q22DC6|Q22DC6_TETTS 40S ribosomal protein S20 OS=Tetrahymena thermophila (strain SB210) OX=312017 GN=TTHERM_00992760 PE=1 SV=2	2	1	1	1	10	13.671	62431	35245	27186	10405	5874.1	4531
tr|Q238Q8|Q238Q8_TETTS;tr|E6PBU0|E6PBU0_TETTH	tr|Q238Q8|Q238Q8_TETTS Uncharacterized protein OS=Tetrahymena thermophila (strain SB210) OX=312017 GN=TTHERM_00454080 PE=1 SV=1;tr|E6PBU0|E6PBU0_TETTH 40S ribosomal protein rpS22e OS=Tetrahymena thermophila OX=5911 PE=1 SV=1	2	2	2	2	18.5	14.906	404680	60535	107130	50585	7566.9	13391
tr|I7MAL3|I7MAL3_TETTS;tr|E6PBU2|E6PBU2_TETTH	tr|I7MAL3|I7MAL3_TETTS 40S ribosomal protein S24 OS=Tetrahymena thermophila (strain SB210) OX=312017 GN=TTHERM_00467660 PE=1 SV=1;tr|E6PBU2|E6PBU2_TETTH 40S ribosomal protein S24 OS=Tetrahymena thermophila OX=5911 PE=1 SV=1	2	4	4	4	37.6	17.092	897020	153240	238020	179400	30648	47605
tr|Q9Y0G7|Q9Y0G7_TETTH;tr|W7XDP3|W7XDP3_TETTS;tr|Q22F12|Q22F12_TETTS;tr|I7MH00|I7MH00_TETTS;tr|Q22CL1|Q22CL1_TETTS;tr|I7LSV4|I7LSV4_TETTS	tr|Q9Y0G7|Q9Y0G7_TETTH Dynein heavy chain (Fragment) OS=Tetrahymena thermophila OX=5911 GN=DYH9 PE=4 SV=1;tr|W7XDP3|W7XDP3_TETTS Dynein heavy chain 1, axonemal protein OS=Tetrahymena thermophila (strain SB210) OX=312017 GN=TTHERM_001151438 PE=4 SV=1;tr|Q22	6	1	1	1	3.5	47.731	27313	0	1274.5	1187.5	0	55.412
tr|I7LSX6|I7LSX6_TETTS	tr|I7LSX6|I7LSX6_TETTS Transmembrane protein, putative OS=Tetrahymena thermophila (strain SB210) OX=312017 GN=TTHERM_00823660 PE=1 SV=1	1	1	1	1	7.8	20.937	73875	21339	15437	18469	5334.6	3859.2
tr|I7LSZ6|I7LSZ6_TETTS	tr|I7LSZ6|I7LSZ6_TETTS Uncharacterized protein OS=Tetrahymena thermophila (strain SB210) OX=312017 GN=TTHERM_00773720 PE=4 SV=1	1	1	1	1	3.3	39.58	20980	678.56	9443.9	1398.7	45.237	629.6
tr|I7LT23|I7LT23_TETTS	tr|I7LT23|I7LT23_TETTS Calcium-transporting ATPase OS=Tetrahymena thermophila (strain SB210) OX=312017 GN=TTHERM_00722920 PE=3 SV=2	1	4	4	4	4.6	113.89	79062	12199	5128.3	1647.1	254.14	106.84
tr|I7LT60|I7LT60_TETTS	tr|I7LT60|I7LT60_TETTS Lysine--tRNA ligase OS=Tetrahymena thermophila (strain SB210) OX=312017 GN=TTHERM_00691520 PE=3 SV=1	1	2	2	2	3.6	76.072	80755	51450	14227	2243.2	1429.2	395.18
tr|I7LT79|I7LT79_TETTS	tr|I7LT79|I7LT79_TETTS Splicing factor subunit 3, putative OS=Tetrahymena thermophila (strain SB210) OX=312017 GN=TTHERM_00649180 PE=4 SV=1	1	2	2	2	4.4	51.638	217080	42681	17219	9867.2	1940.1	782.7
tr|I7LTL6|I7LTL6_TETTS	tr|I7LTL6|I7LTL6_TETTS 26S proteasome regulatory complex, subunit RPN2 OS=Tetrahymena thermophila (strain SB210) OX=312017 GN=TTHERM_00442210 PE=3 SV=2	1	18	18	18	24.1	105.99	2898600	892770	811940	69014	21256	19332
tr|I7LTQ6|I7LTQ6_TETTS	tr|I7LTQ6|I7LTQ6_TETTS EF-hand pair protein OS=Tetrahymena thermophila (strain SB210) OX=312017 GN=TTHERM_00420790 PE=4 SV=1	1	5	5	5	7.3	84.699	13886000	144800	183000	514300	5362.9	6777.6
tr|I7LTW6|I7LTW6_TETTS	tr|I7LTW6|I7LTW6_TETTS AAA domain protein OS=Tetrahymena thermophila (strain SB210) OX=312017 GN=TTHERM_00059330 PE=4 SV=1	1	14	14	14	42.9	41.841	4100300	1095100	1171900	170850	45628	48831
tr|I7LTY1|I7LTY1_TETTS	tr|I7LTY1|I7LTY1_TETTS Succinate--CoA ligase [ADP-forming] subunit alpha, mitochondrial OS=Tetrahymena thermophila (strain SB210) OX=312017 GN=TTHERM_00068140 PE=3 SV=1	1	2	2	2	10.3	32.945	278000	163590	46808	17375	10225	2925.5
tr|I7LUE5|I7LUE5_TETTS	tr|I7LUE5|I7LUE5_TETTS Vacuolar protein sorting-associated protein 35 OS=Tetrahymena thermophila (strain SB210) OX=312017 GN=TTHERM_00295120 PE=3 SV=2	1	1	1	1	1.7	90.808	40465	24563	0	919.65	558.25	0
tr|I7LUE6|I7LUE6_TETTS	tr|I7LUE6|I7LUE6_TETTS Thioredoxin-dependent peroxide reductase OS=Tetrahymena thermophila (strain SB210) OX=312017 GN=TTHERM_00295170 PE=4 SV=2	1	2	2	2	9.1	30.497	95192	16327	19839	5949.5	1020.4	1240
tr|I7LUL1|I7LUL1_TETTS	tr|I7LUL1|I7LUL1_TETTS DEAD/DEAH-box helicase OS=Tetrahymena thermophila (strain SB210) OX=312017 GN=TTHERM_00522650 PE=4 SV=1	1	4	4	4	11.4	47.536	99079	34781	20459	4128.3	1449.2	852.44
tr|I7LUR8|I7LUR8_TETTS;tr|Q38KF8|Q38KF8_TETTH	tr|I7LUR8|I7LUR8_TETTS Clathrin heavy chain OS=Tetrahymena thermophila (strain SB210) OX=312017 GN=TTHERM_00275740 PE=3 SV=2	2	22	22	22	17.5	197.16	3415100	953330	575460	38807	10833	6539.3
tr|I7LV04|I7LV04_TETTS	tr|I7LV04|I7LV04_TETTS Transmembrane protein, putative OS=Tetrahymena thermophila (strain SB210) OX=312017 GN=TTHERM_00190740 PE=4 SV=1	1	1	1	1	5.3	23.755	77106	8846.1	38874	12851	1474.4	6479
tr|I7LV38|I7LV38_TETTS	tr|I7LV38|I7LV38_TETTS RuvB-like helicase OS=Tetrahymena thermophila (strain SB210) OX=312017 GN=TTHERM_00476820 PE=3 SV=1	1	12	12	12	35.2	49.79	1873600	429410	560710	78069	17892	23363
tr|I7LV86|I7LV86_TETTS	tr|I7LV86|I7LV86_TETTS Uncharacterized protein OS=Tetrahymena thermophila (strain SB210) OX=312017 GN=TTHERM_00340020 PE=4 SV=2	1	1	1	1	4.5	34.134	454170	90422	235740	21627	4305.8	11226
tr|I7LVQ8|I7LVQ8_TETTS	tr|I7LVQ8|I7LVQ8_TETTS Oxidoreductase, putative OS=Tetrahymena thermophila (strain SB210) OX=312017 GN=TTHERM_00137990 PE=1 SV=2	1	6	6	6	17.1	54.833	1703400	594570	376790	63088	22021	13955
tr|I7LVW4|I7LVW4_TETTS	tr|I7LVW4|I7LVW4_TETTS Uncharacterized protein OS=Tetrahymena thermophila (strain SB210) OX=312017 GN=TTHERM_00216030 PE=4 SV=2	1	1	1	1	0.7	133.68	258160	61354	45301	4693.9	1115.5	823.65
tr|I7LW62|I7LW62_TETTS	tr|I7LW62|I7LW62_TETTS Actin OS=Tetrahymena thermophila (strain SB210) OX=312017 GN=TTHERM_00310470 PE=3 SV=1	1	1	1	1	3.3	44.931	23725	0	12182	1129.7	0	580.11
tr|I7LWG7|I7LWG7_TETTS	tr|I7LWG7|I7LWG7_TETTS ABC transporter family protein OS=Tetrahymena thermophila (strain SB210) OX=312017 GN=TTHERM_00564120 PE=4 SV=2	1	2	2	2	2.8	82.863	41155	0	0	1028.9	0	0
tr|I7LWP4|I7LWP4_TETTS	tr|I7LWP4|I7LWP4_TETTS NAD-dependent aldehyde dehydrogenase family protein OS=Tetrahymena thermophila (strain SB210) OX=312017 GN=TTHERM_00729250 PE=4 SV=1	1	14	14	14	28.8	54.575	4835600	1704000	1393000	151110	53249	43530
tr|I7LWR6|I7LWR6_TETTS	tr|I7LWR6|I7LWR6_TETTS Acyl-coenzyme A oxidase OS=Tetrahymena thermophila (strain SB210) OX=312017 GN=TTHERM_00348060 PE=3 SV=2	1	4	4	4	8.5	75.737	151180	38155	38641	4199.6	1059.9	1073.4
tr|I7LWT9|I7LWT9_TETTS	tr|I7LWT9|I7LWT9_TETTS Adenosylhomocysteinase OS=Tetrahymena thermophila (strain SB210) OX=312017 GN=TTHERM_00353280 PE=3 SV=1	1	10	10	10	25.9	53.493	920110	393670	246740	38338	16403	10281
tr|I7LWW8|I7LWW8_TETTS	tr|I7LWW8|I7LWW8_TETTS Cation channel family protein OS=Tetrahymena thermophila (strain SB210) OX=312017 GN=TTHERM_00494610 PE=4 SV=2	1	1	1	1	0.7	163.72	3294500	0	3294500	54908	0	54908
tr|I7LX18|I7LX18_TETTS	tr|I7LX18|I7LX18_TETTS Citrate synthase OS=Tetrahymena thermophila (strain SB210) OX=312017 GN=TTHERM_00537060 PE=3 SV=1	1	3	3	3	11.8	42.477	154480	48695	2318.2	7356.3	2318.8	110.39
tr|I7LXC8|I7LXC8_TETTS	tr|I7LXC8|I7LXC8_TETTS Mapeg family protein OS=Tetrahymena thermophila (strain SB210) OX=312017 GN=TTHERM_00302050 PE=4 SV=2	1	1	1	1	6.1	22.254	52921	14382	8916.8	7560.2	2054.6	1273.8
tr|I7LXG7|I7LXG7_TETTS	tr|I7LXG7|I7LXG7_TETTS T-complex protein 1 subunit gamma OS=Tetrahymena thermophila (strain SB210) OX=312017 GN=TTHERM_00239290 PE=3 SV=1	1	13	13	13	29.2	61.677	1305700	538330	330300	36270	14954	9175
tr|I7LXS6|I7LXS6_TETTS	tr|I7LXS6|I7LXS6_TETTS Leucyl-tRNA synthetase OS=Tetrahymena thermophila (strain SB210) OX=312017 GN=TTHERM_00670340 PE=3 SV=2	1	11	11	11	13.3	124.24	871780	430940	167880	16449	8130.9	3167.5
tr|I7LXS9|I7LXS9_TETTS	tr|I7LXS9|I7LXS9_TETTS TCP-1 (CTT or eukaryotic type II) chaperonin family, zeta subunit OS=Tetrahymena thermophila (strain SB210) OX=312017 GN=TTHERM_00670500 PE=3 SV=1	1	6	6	6	16.3	59.42	537210	201900	133330	19896	7477.9	4938
tr|I7LXX3|I7LXX3_TETTS	tr|I7LXX3|I7LXX3_TETTS Calcium-transporting ATPase OS=Tetrahymena thermophila (strain SB210) OX=312017 GN=TTHERM_00688500 PE=3 SV=1	1	3	3	3	3.4	116.18	109300	0	27392	2325.5	0	582.8
tr|I7LY52|I7LY52_TETTS	tr|I7LY52|I7LY52_TETTS Uncharacterized protein OS=Tetrahymena thermophila (strain SB210) OX=312017 GN=TTHERM_00497680 PE=4 SV=2	1	1	1	1	1.4	225.92	3365700	885200	336890	29785	7833.6	2981.4
tr|I7LY65|I7LY65_TETTS	tr|I7LY65|I7LY65_TETTS Uncharacterized protein OS=Tetrahymena thermophila (strain SB210) OX=312017 GN=TTHERM_00525160 PE=4 SV=2	1	1	1	1	4.8	29.822	67086	29829	0	4192.9	1864.3	0
tr|P90618|P90618_TETTH;tr|I7LY81|I7LY81_TETTS	tr|P90618|P90618_TETTH Granule lattice protein 1 OS=Tetrahymena thermophila OX=5911 GN=GRL1 PE=4 SV=1;tr|I7LY81|I7LY81_TETTS Uncharacterized protein OS=Tetrahymena thermophila (strain SB210) OX=312017 GN=TTHERM_00527180 PE=4 SV=1	2	8	8	8	23.6	45.273	1803600	291800	105480	120240	19454	7032.1
tr|I7LZN9|I7LZN9_TETTS;tr|I7M665|I7M665_TETTS	tr|I7LZN9|I7LZN9_TETTS Zinc finger, C2H2 type family protein OS=Tetrahymena thermophila (strain SB210) OX=312017 GN=TTHERM_00691390 PE=4 SV=1;tr|I7M665|I7M665_TETTS Zinc finger, C2H2 type family protein OS=Tetrahymena thermophila (strain SB210) OX=312017 G	2	1	1	1	3.3	29.25	33608	25464	0	2585.2	1958.8	0
tr|I7LZQ9|I7LZQ9_TETTS	tr|I7LZQ9|I7LZQ9_TETTS 26S proteasome non-ATPase regulatory subunit 8 OS=Tetrahymena thermophila (strain SB210) OX=312017 GN=TTHERM_00649110 PE=3 SV=2	1	8	8	8	35.2	31.137	1471100	547710	419160	91945	34232	26197
tr|I7LZV1|I7LZV1_TETTS	tr|I7LZV1|I7LZV1_TETTS ATP synthase subunit beta OS=Tetrahymena thermophila (strain SB210) OX=312017 GN=TTHERM_00585260 PE=1 SV=1	1	15	15	15	45.9	53.431	9235400	3291100	2555400	401540	143090	111110
tr|I7LZW2|I7LZW2_TETTS	tr|I7LZW2|I7LZW2_TETTS Transmembrane protein, putative OS=Tetrahymena thermophila (strain SB210) OX=312017 GN=TTHERM_00529760 PE=1 SV=1	1	1	1	1	5.7	24.358	47891	21740	0	4353.8	1976.4	0
tr|I7LZY0|I7LZY0_TETTS	tr|I7LZY0|I7LZY0_TETTS Acetyltransferase component of pyruvate dehydrogenase complex OS=Tetrahymena thermophila (strain SB210) OX=312017 GN=TTHERM_00530750 PE=3 SV=1	1	5	5	5	11.5	67.497	513280	161240	124300	15554	4886.1	3766.6
tr|I7LZZ3|I7LZZ3_TETTS	tr|I7LZZ3|I7LZZ3_TETTS Uncharacterized protein OS=Tetrahymena thermophila (strain SB210) OX=312017 GN=TTHERM_00486350 PE=4 SV=2	1	1	1	1	1.9	103.15	466780	182430	78543	9724.6	3800.7	1636.3
tr|I7M007|I7M007_TETTS	tr|I7M007|I7M007_TETTS Fructose-bisphosphate aldolase OS=Tetrahymena thermophila (strain SB210) OX=312017 GN=TTHERM_00487090 PE=3 SV=1	1	5	5	5	14.3	38.598	563780	119120	226930	28189	5956	11346
tr|I7M0B1|I7M0B1_TETTS	tr|I7M0B1|I7M0B1_TETTS Protein disulfide-isomerase OS=Tetrahymena thermophila (strain SB210) OX=312017 GN=TTHERM_00549480 PE=3 SV=1	1	3	3	3	7.8	56.06	64669	1038.1	18710	3079.5	49.434	890.93
tr|I7M0C0|I7M0C0_TETTS	tr|I7M0C0|I7M0C0_TETTS Enoyl-CoA hydratase/isomerase OS=Tetrahymena thermophila (strain SB210) OX=312017 GN=TTHERM_00055990 PE=3 SV=1	1	1	1	1	6.3	31.312	26133	7261.6	18871	1742.2	484.11	1258.1
tr|I7M0G0|I7M0G0_TETTS	tr|I7M0G0|I7M0G0_TETTS Uncharacterized protein OS=Tetrahymena thermophila (strain SB210) OX=312017 GN=TTHERM_00068120 PE=1 SV=2	1	1	1	1	9.4	17.32	92524	32372	0	10280	3596.9	0
tr|I7M0P3|I7M0P3_TETTS	tr|I7M0P3|I7M0P3_TETTS Uncharacterized protein OS=Tetrahymena thermophila (strain SB210) OX=312017 GN=TTHERM_00561660 PE=4 SV=2	1	1	1	1	0.7	195.03	99218	44403	15894	972.73	435.32	155.82
tr|I7M0P6|I7M0P6_TETTS	tr|I7M0P6|I7M0P6_TETTS Nascent polypeptide-associated complex subunit beta OS=Tetrahymena thermophila (strain SB210) OX=312017 GN=TTHERM_00705050 PE=3 SV=1	1	1	1	1	5.8	17.448	18726	642.46	14479	2340.7	80.307	1809.9
tr|I7M0W0|I7M0W0_TETTS	tr|I7M0W0|I7M0W0_TETTS Oxalate/formate antiporter OS=Tetrahymena thermophila (strain SB210) OX=312017 GN=TTHERM_00146450 PE=4 SV=2	1	1	1	1	2.8	60.51	63042	8391.3	11063	3152.1	419.57	553.16
tr|I7M148|I7M148_TETTS	tr|I7M148|I7M148_TETTS Serine/Threonine kinase domain protein OS=Tetrahymena thermophila (strain SB210) OX=312017 GN=TTHERM_00523000 PE=4 SV=1	1	3	3	3	6.4	69.432	239950	117310	53202	7998.3	3910.2	1773.4
tr|I7M185|I7M185_TETTS	tr|I7M185|I7M185_TETTS Polyprenyl synthetase protein OS=Tetrahymena thermophila (strain SB210) OX=312017 GN=TTHERM_00268030 PE=3 SV=1	1	4	4	4	14.6	48.126	260070	82604	48182	12384	3933.5	2294.4
tr|I7M1H9|I7M1H9_TETTS	tr|I7M1H9|I7M1H9_TETTS Dual-specificity kinase domain protein OS=Tetrahymena thermophila (strain SB210) OX=312017 GN=TTHERM_00189460 PE=4 SV=1	1	1	1	1	2.3	70.263	10310	0	1836.6	245.49	0	43.729
tr|I7M1R0|I7M1R0_TETTS	tr|I7M1R0|I7M1R0_TETTS 26S proteasome regulatory subunit OS=Tetrahymena thermophila (strain SB210) OX=312017 GN=TTHERM_00339610 PE=3 SV=1	1	17	17	17	26.4	99.262	3661100	1286600	945700	76272	26805	19702
tr|I7M1V7|I7M1V7_TETTS	tr|I7M1V7|I7M1V7_TETTS DNA helicase OS=Tetrahymena thermophila (strain SB210) OX=312017 GN=TTHERM_00277550 PE=3 SV=1	1	3	3	3	4.4	89.825	163010	48088	41933	3543.7	1045.4	911.58
tr|I7M299|I7M299_TETTS	tr|I7M299|I7M299_TETTS IPT/TIG domain protein OS=Tetrahymena thermophila (strain SB210) OX=312017 GN=TTHERM_00138610 PE=4 SV=2	1	1	1	1	0.3	408.22	741690	263990	125630	6742.7	2399.9	1142.1
tr|I7M2A9|I7M2A9_TETTS	tr|I7M2A9|I7M2A9_TETTS Calmodulin-domain kinase OS=Tetrahymena thermophila (strain SB210) OX=312017 GN=TTHERM_00589960 PE=3 SV=1	1	2	2	2	4	54.08	156950	43041	52818	6278.2	1721.6	2112.7
tr|I7M2E3|I7M2E3_TETTS	tr|I7M2E3|I7M2E3_TETTS Bmh1 14-3-3 family protein OS=Tetrahymena thermophila (strain SB210) OX=312017 GN=TTHERM_00216010 PE=3 SV=1	1	6	6	6	31.1	28.131	931820	407150	232400	51768	22619	12911
tr|I7M2F8|I7M2F8_TETTS	tr|I7M2F8|I7M2F8_TETTS H(+)-exporting diphosphatase OS=Tetrahymena thermophila (strain SB210) OX=312017 GN=TTHERM_00218790 PE=3 SV=1	1	11	11	9	16	79.209	6676500	1666800	1878900	290280	72469	81693
tr|I7M304|I7M304_TETTS	tr|I7M304|I7M304_TETTS Dynein heavy chain, amine-terminal region protein OS=Tetrahymena thermophila (strain SB210) OX=312017 GN=TTHERM_00565600 PE=4 SV=2	1	1	1	1	0.2	529.58	66140	42943	23197	280.25	181.96	98.294
tr|I7M328|I7M328_TETTS	tr|I7M328|I7M328_TETTS PX-SNX8-Mvp1p-like protein OS=Tetrahymena thermophila (strain SB210) OX=312017 GN=TTHERM_00502220 PE=4 SV=1	1	2	2	2	5.4	48.254	164100	91892	19891	6077.7	3403.4	736.71
tr|I7M390|I7M390_TETTS	tr|I7M390|I7M390_TETTS L-isoaspartate O-methyltransferase OS=Tetrahymena thermophila (strain SB210) OX=312017 GN=TTHERM_00580360 PE=3 SV=2	1	3	3	3	5.8	77.711	159730	6751.2	92350	5507.9	232.8	3184.5
tr|I7M3G1|I7M3G1_TETTS	tr|I7M3G1|I7M3G1_TETTS Heat shock protein HSP90 OS=Tetrahymena thermophila (strain SB210) OX=312017 GN=TTHERM_00444670 PE=3 SV=1	1	20	20	20	30.4	92.088	4023600	1151600	1393600	98136	28088	33990
tr|I7M3G9|I7M3G9_TETTS	tr|I7M3G9|I7M3G9_TETTS 26S proteasome non-ATPase regulatory subunit 3, putative OS=Tetrahymena thermophila (strain SB210) OX=312017 GN=TTHERM_00446090 PE=3 SV=1	1	8	8	8	21.9	56.961	1609700	567500	405860	48778	17197	12299
tr|I7M3J0|I7M3J0_TETTS	tr|I7M3J0|I7M3J0_TETTS Phosphate carrier protein OS=Tetrahymena thermophila (strain SB210) OX=312017 GN=TTHERM_00535740 PE=3 SV=1	1	3	3	3	13.8	33.186	666410	184290	208170	37023	10239	11565
tr|I7M3L9|I7M3L9_TETTS	tr|I7M3L9|I7M3L9_TETTS Glutamine-dependent NAD(+) synthetase OS=Tetrahymena thermophila (strain SB210) OX=312017 GN=TTHERM_00474780 PE=3 SV=1	1	3	3	3	4.8	80.411	109900	21130	14421	3434.4	660.32	450.66
tr|I7M3W6|I7M3W6_TETTS	tr|I7M3W6|I7M3W6_TETTS Aspartate--tRNA ligase OS=Tetrahymena thermophila (strain SB210) OX=312017 GN=TTHERM_00616050 PE=3 SV=2	1	11	11	11	24.5	64.673	1192700	347800	338040	36143	10539	10244
tr|I7M403|I7M403_TETTS	tr|I7M403|I7M403_TETTS Iron-sulfur subunit of complex II OS=Tetrahymena thermophila (strain SB210) OX=312017 GN=TTHERM_00241700 PE=3 SV=1	1	1	1	1	3.8	35.956	22932	22932	0	1206.9	1206.9	0
tr|I7M441|I7M441_TETTS	tr|I7M441|I7M441_TETTS Transmembrane protein, putative OS=Tetrahymena thermophila (strain SB210) OX=312017 GN=TTHERM_00469070 PE=4 SV=1	1	1	1	1	1.1	138.48	5098.7	0	0	87.909	0	0
tr|I7M447|I7M447_TETTS	tr|I7M447|I7M447_TETTS DEAD/DEAH-box helicase OS=Tetrahymena thermophila (strain SB210) OX=312017 GN=TTHERM_00469380 PE=4 SV=2	1	6	6	6	14	65.914	969440	327940	198890	31272	10579	6415.8
tr|I7M483|I7M483_TETTS	tr|I7M483|I7M483_TETTS Branched-chain-amino-acid aminotransferase OS=Tetrahymena thermophila (strain SB210) OX=312017 GN=TTHERM_00765280 PE=3 SV=1	1	1	1	1	4.4	46.262	37345	19049	0	1867.2	952.43	0
tr|I7M484|I7M484_TETTS	tr|I7M484|I7M484_TETTS Transmembrane protein, putative OS=Tetrahymena thermophila (strain SB210) OX=312017 GN=TTHERM_00765330 PE=4 SV=1	1	1	1	1	9.2	15.656	157830	42826	39707	22547	6117.9	5672.4
tr|I7M5Z3|I7M5Z3_TETTS	tr|I7M5Z3|I7M5Z3_TETTS Acyl-coenzyme A oxidase OS=Tetrahymena thermophila (strain SB210) OX=312017 GN=TTHERM_00773160 PE=3 SV=2	1	10	10	10	17.1	84.618	2381100	149500	633630	62660	3934.2	16674
tr|I7M682|I7M682_TETTS	tr|I7M682|I7M682_TETTS Translation initiation factor, putative OS=Tetrahymena thermophila (strain SB210) OX=312017 GN=TTHERM_00648930 PE=4 SV=2	1	9	9	9	8.1	154.38	1039100	22779	627310	14844	325.41	8961.6
tr|I7M6E0|I7M6E0_TETTS	tr|I7M6E0|I7M6E0_TETTS Vacuolar V-type H(+)-ATPase B subunit OS=Tetrahymena thermophila (strain SB210) OX=312017 GN=TTHERM_00529860 PE=3 SV=2	1	13	13	13	36.1	65.162	3695100	1219400	1207200	131970	43550	43114
tr|I7M6H4|I7M6H4_TETTS;tr|Q9Y0H1|Q9Y0H1_TETTH;tr|A5Z289|A5Z289_TETTH	tr|I7M6H4|I7M6H4_TETTS Dynein-1-alpha heavy chain, flagellar inner arm I1 complex protein, putative OS=Tetrahymena thermophila (strain SB210) OX=312017 GN=TTHERM_00486600 PE=1 SV=2	3	8	8	8	2.3	474.97	162520	26167	10470	719.11	115.78	46.329
tr|I7M6H8|I7M6H8_TETTS	tr|I7M6H8|I7M6H8_TETTS Inosine-5-monophosphate dehydrogenase OS=Tetrahymena thermophila (strain SB210) OX=312017 GN=TTHERM_00486810 PE=4 SV=1	1	2	2	2	3.8	67.354	103660	14886	28626	3239.5	465.19	894.57
tr|I7M6I2|I7M6I2_TETTS	tr|I7M6I2|I7M6I2_TETTS Prolyl-tRNA synthetase OS=Tetrahymena thermophila (strain SB210) OX=312017 GN=TTHERM_00487020 PE=3 SV=2	1	11	11	11	18.4	85.031	2595700	789950	768380	58992	17953	17463
tr|I7M6L0|I7M6L0_TETTS	tr|I7M6L0|I7M6L0_TETTS Ubiquitin interaction motif protein OS=Tetrahymena thermophila (strain SB210) OX=312017 GN=TTHERM_00471830 PE=3 SV=1	1	3	3	3	11.2	43.494	174140	39623	25376	17414	3962.3	2537.6
tr|I7M6L2|I7M6L2_TETTS	tr|I7M6L2|I7M6L2_TETTS Uncharacterized protein OS=Tetrahymena thermophila (strain SB210) OX=312017 GN=TTHERM_00471950 PE=4 SV=1	1	1	1	1	2.8	46.777	95700	12674	16680	4160.9	551.02	725.21
tr|I7M6Q5|I7M6Q5_TETTS	tr|I7M6Q5|I7M6Q5_TETTS Transmembrane protein, putative OS=Tetrahymena thermophila (strain SB210) OX=312017 GN=TTHERM_00420460 PE=4 SV=1	1	2	2	2	4.9	58.836	87459	24639	0	6247.1	1759.9	0
tr|I7M6S0|I7M6S0_TETTS	tr|I7M6S0|I7M6S0_TETTS Gamma-carbonic anhydrase OS=Tetrahymena thermophila (strain SB210) OX=312017 GN=TTHERM_00541460 PE=4 SV=1	1	1	1	1	6	25.369	56151	22697	14538	5615.1	2269.7	1453.8
tr|I7M6U9|I7M6U9_TETTS	tr|I7M6U9|I7M6U9_TETTS Glutamine--tRNA ligase OS=Tetrahymena thermophila (strain SB210) OX=312017 GN=TTHERM_00056140 PE=3 SV=1	1	2	2	2	2.2	89.133	118700	39006	24639	2422.4	796.05	502.83
tr|I7M6Y6|I7M6Y6_TETTS	tr|I7M6Y6|I7M6Y6_TETTS 26S protease regulatory subunit 6B OS=Tetrahymena thermophila (strain SB210) OX=312017 GN=TTHERM_00068110 PE=3 SV=2	1	10	10	10	37.9	45.722	1352600	422450	366490	67628	21123	18325
tr|I7M797|I7M797_TETTS	tr|I7M797|I7M797_TETTS Uncharacterized protein OS=Tetrahymena thermophila (strain SB210) OX=312017 GN=TTHERM_00142260 PE=4 SV=2	1	1	1	1	1.2	202.14	1680200	416700	529510	21821	5411.7	6876.8
tr|I7M7A9|I7M7A9_TETTS	tr|I7M7A9|I7M7A9_TETTS Transmembrane protein, putative OS=Tetrahymena thermophila (strain SB210) OX=312017 GN=TTHERM_00144900 PE=4 SV=1	1	1	1	1	2.8	49.677	12752	0	0	490.45	0	0
tr|I7M7B1|I7M7B1_TETTS	tr|I7M7B1|I7M7B1_TETTS Uncharacterized protein OS=Tetrahymena thermophila (strain SB210) OX=312017 GN=TTHERM_00145010 PE=1 SV=2	1	3	3	3	2.1	179.03	80239	12261	33126	1015.7	155.2	419.31
tr|I7M7C8|I7M7C8_TETTS	tr|I7M7C8|I7M7C8_TETTS Peroxisomal biogenesis factor 11 OS=Tetrahymena thermophila (strain SB210) OX=312017 GN=TTHERM_00145910 PE=4 SV=1	1	1	1	1	3.6	28.76	7435.6	0	0	531.12	0	0
tr|I7M7F8|I7M7F8_TETTS;tr|I7MID5|I7MID5_TETTS	tr|I7M7F8|I7M7F8_TETTS Polyadenylate-binding protein OS=Tetrahymena thermophila (strain SB210) OX=312017 GN=TTHERM_00295340 PE=3 SV=1	2	3	3	3	6.4	70.477	59577	11954	29457	1654.9	332.05	818.25
tr|I7M7L0|I7M7L0_TETTS	tr|I7M7L0|I7M7L0_TETTS Peroxisomal biogenesis factor 11 OS=Tetrahymena thermophila (strain SB210) OX=312017 GN=TTHERM_00522160 PE=4 SV=1	1	1	1	1	5.6	26.674	329780	65512	83735	19399	3853.7	4925.6
tr|I7M8A6|I7M8A6_TETTS	tr|I7M8A6|I7M8A6_TETTS Succinate--CoA ligase [ADP-forming] subunit beta, mitochondrial OS=Tetrahymena thermophila (strain SB210) OX=312017 GN=TTHERM_00437600 PE=3 SV=1	1	4	4	4	11.7	49.534	382200	43463	109670	15288	1738.5	4386.8
tr|I7M8Q3|I7M8Q3_TETTS	tr|I7M8Q3|I7M8Q3_TETTS Transmembrane protein, putative OS=Tetrahymena thermophila (strain SB210) OX=312017 GN=TTHERM_00136220 PE=1 SV=2	1	4	4	4	17.5	34.676	312110	118430	107890	17339	6579.4	5994.1
tr|I7M8Q7|I7M8Q7_TETTS	tr|I7M8Q7|I7M8Q7_TETTS Transcription factor apfi protein, putative OS=Tetrahymena thermophila (strain SB210) OX=312017 GN=TTHERM_00136440 PE=4 SV=2	1	1	1	1	4	39.749	113270	34233	33793	6292.9	1901.8	1877.4
tr|I7M8T5|I7M8T5_TETTS	tr|I7M8T5|I7M8T5_TETTS Acyl-coenzyme A oxidase OS=Tetrahymena thermophila (strain SB210) OX=312017 GN=TTHERM_00586710 PE=3 SV=2	1	2	2	2	4.5	79.056	66807	0	0	1713	0	0
tr|I7M8Y1|I7M8Y1_TETTS	tr|I7M8Y1|I7M8Y1_TETTS Phenylalanyl-tRNA synthetase beta subunit OS=Tetrahymena thermophila (strain SB210) OX=312017 GN=TTHERM_00218410 PE=3 SV=2	1	7	7	7	16.9	67.662	645060	317940	115240	21502	10598	3841.5
tr|I7M913|I7M913_TETTS	tr|I7M913|I7M913_TETTS Alanine--tRNA ligase OS=Tetrahymena thermophila (strain SB210) OX=312017 GN=TTHERM_00221140 PE=3 SV=2	1	13	13	13	15.8	110.8	1281600	515820	269320	25631	10316	5386.5
tr|I7M980|I7M980_TETTS	tr|I7M980|I7M980_TETTS Uncharacterized protein OS=Tetrahymena thermophila (strain SB210) OX=312017 GN=TTHERM_00316290 PE=1 SV=2	1	4	4	3	20.4	26.323	526780	181600	78792	52678	18160	7879.2
tr|I7M9I3|I7M9I3_TETTS	tr|I7M9I3|I7M9I3_TETTS Kinesin motor catalytic domain protein OS=Tetrahymena thermophila (strain SB210) OX=312017 GN=TTHERM_00564530 PE=3 SV=2	1	1	1	1	0.5	195.37	4614	4614	0	49.613	49.613	0
tr|I7M9J2|I7M9J2_TETTS;tr|O76506|O76506_TETTH	tr|I7M9J2|I7M9J2_TETTS Outer arm dynein beta heavy chain OS=Tetrahymena thermophila (strain SB210) OX=312017 GN=TTHERM_00499300 PE=1 SV=1;tr|O76506|O76506_TETTH Ciliary outer arm dynein beta heavy chain OS=Tetrahymena thermophila OX=5911 GN=DYH4 PE=4 SV=1	2	15	15	15	4.2	529.52	445750	36187	26797	1682.1	136.55	101.12
tr|Q8T932|Q8T932_TETTH;tr|I7M9N1|I7M9N1_TETTS	tr|Q8T932|Q8T932_TETTH Induced during granule regeneration 1 OS=Tetrahymena thermophila OX=5911 PE=4 SV=1;tr|I7M9N1|I7M9N1_TETTS Uncharacterized protein OS=Tetrahymena thermophila (strain SB210) OX=312017 GN=TTHERM_00558350 PE=4 SV=1	2	1	1	1	3.6	34.975	80146	36558	0	6165.1	2812.2	0
tr|I7M9Q5|I7M9Q5_TETTS	tr|I7M9Q5|I7M9Q5_TETTS Uncharacterized protein OS=Tetrahymena thermophila (strain SB210) OX=312017 GN=TTHERM_00578520 PE=4 SV=2	1	2	2	2	0.8	315.3	46937	7700	17344	262.22	43.017	96.896
tr|I7M9Y5|I7M9Y5_TETTS	tr|I7M9Y5|I7M9Y5_TETTS Coatomer subunit gamma OS=Tetrahymena thermophila (strain SB210) OX=312017 GN=TTHERM_00444320 PE=3 SV=1	1	4	4	4	6.4	105.39	246040	54809	39201	4473.5	996.53	712.75
tr|I7M9Y8|I7M9Y8_TETTS	tr|I7M9Y8|I7M9Y8_TETTS HEAT repeat protein OS=Tetrahymena thermophila (strain SB210) OX=312017 GN=TTHERM_00444500 PE=3 SV=1	1	1	1	1	0.4	289.19	43689	13894	9575.1	291.26	92.627	63.834
tr|I7MA05|I7MA05_TETTS;tr|Q6PUA5|Q6PUA5_TETTH	tr|I7MA05|I7MA05_TETTS Structural maintenance of chromosomes protein OS=Tetrahymena thermophila (strain SB210) OX=312017 GN=TTHERM_00446400 PE=3 SV=1;tr|Q6PUA5|Q6PUA5_TETTH Structural maintenance of chromosomes protein OS=Tetrahymena thermophila OX=5911 GN	2	13	13	13	12.1	158.99	754420	118220	187620	11094	1738.5	2759.2
tr|I7MA33|I7MA33_TETTS	tr|I7MA33|I7MA33_TETTS Transmembrane protein, putative OS=Tetrahymena thermophila (strain SB210) OX=312017 GN=TTHERM_00537380 PE=4 SV=1	1	1	1	1	3.3	44.122	48295	12206	0	4390.4	1109.6	0
tr|I7MA52|I7MA52_TETTS	tr|I7MA52|I7MA52_TETTS 60S acidic ribosomal protein OS=Tetrahymena thermophila (strain SB210) OX=312017 GN=TTHERM_00474970 PE=3 SV=2	1	2	2	2	17.3	20.425	269980	25730	96447	33748	3216.3	12056
tr|I7MAA0|I7MAA0_TETTS	tr|I7MAA0|I7MAA0_TETTS Meiotic recombination protein DMC1, putative OS=Tetrahymena thermophila (strain SB210) OX=312017 GN=TTHERM_00459230 PE=3 SV=1	1	2	2	2	7	39.599	27892	0	0	1743.3	0	0
tr|I7MAB4|I7MAB4_TETTS	tr|I7MAB4|I7MAB4_TETTS Methylmalonate-semialdehyde dehydrogenase (CoA acylating) OS=Tetrahymena thermophila (strain SB210) OX=312017 GN=TTHERM_00299840 PE=4 SV=1	1	4	4	4	12.1	57.663	699270	327260	185080	24113	11285	6381.9
tr|I7MAR7|I7MAR7_TETTS	tr|I7MAR7|I7MAR7_TETTS Serine/threonine protein phosphatase 2A regulatory subunit A, putative OS=Tetrahymena thermophila (strain SB210) OX=312017 GN=TTHERM_00766530 PE=4 SV=1	1	1	1	1	2.6	65.689	18828	0	0	570.54	0	0
tr|I7MB26|I7MB26_TETTS	tr|I7MB26|I7MB26_TETTS Spermine/spermidine synthase OS=Tetrahymena thermophila (strain SB210) OX=312017 GN=TTHERM_00647220 PE=4 SV=1	1	3	3	3	8.8	41.406	114400	48393	41694	6021.2	2547	2194.4
tr|I7MB50|I7MB50_TETTS	tr|I7MB50|I7MB50_TETTS Cytochrome C oxidase assembly protein COX15, putative OS=Tetrahymena thermophila (strain SB210) OX=312017 GN=TTHERM_00497120 PE=3 SV=1	1	2	2	2	6.9	50.601	62516	10889	16198	2604.8	453.69	674.94
tr|I7MCL9|I7MCL9_TETTS	tr|I7MCL9|I7MCL9_TETTS Calpain family cysteine protease OS=Tetrahymena thermophila (strain SB210) OX=312017 GN=TTHERM_00715730 PE=4 SV=2	1	4	4	4	9.2	82.781	329870	103470	85315	9162.9	2874.2	2369.9
tr|I7MCP6|I7MCP6_TETTS	tr|I7MCP6|I7MCP6_TETTS Asparagine--tRNA ligase OS=Tetrahymena thermophila (strain SB210) OX=312017 GN=TTHERM_00691890 PE=3 SV=2	1	7	7	7	15.8	68.167	1776700	645860	430860	49351	17941	11968
tr|I7MCQ6|I7MCQ6_TETTS	tr|I7MCQ6|I7MCQ6_TETTS Uncharacterized protein OS=Tetrahymena thermophila (strain SB210) OX=312017 GN=TTHERM_00649060 PE=1 SV=2	1	5	5	5	28.3	29.314	385470	134950	75792	22675	7938.4	4458.4
tr|I7MCZ0|I7MCZ0_TETTS	tr|I7MCZ0|I7MCZ0_TETTS Uncharacterized protein OS=Tetrahymena thermophila (strain SB210) OX=312017 GN=TTHERM_00486310 PE=1 SV=2	1	3	3	3	11.9	32.423	387540	125970	90406	27681	8998	6457.6
tr|I7MD94|I7MD94_TETTS	tr|I7MD94|I7MD94_TETTS Protein kinase OS=Tetrahymena thermophila (strain SB210) OX=312017 GN=TTHERM_00543590 PE=4 SV=1	1	1	1	1	1.2	82.095	76916	23612	24197	3496.2	1073.3	1099.9
tr|I7MDD0|I7MDD0_TETTS	tr|I7MDD0|I7MDD0_TETTS PA domain protein OS=Tetrahymena thermophila (strain SB210) OX=312017 GN=TTHERM_00058640 PE=4 SV=1	1	1	1	1	2	57.581	51849	17960	3843.5	2160.4	748.33	160.15
tr|I7MDY2|I7MDY2_TETTS	tr|I7MDY2|I7MDY2_TETTS Uncharacterized protein OS=Tetrahymena thermophila (strain SB210) OX=312017 GN=TTHERM_00295530 PE=4 SV=2	1	1	1	1	0.9	156.31	813030	260930	222830	14018	4498.8	3841.9
tr|I7MDZ5|I7MDZ5_TETTS;tr|Q9U0D5|Q9U0D5_TETTH;tr|I7MJT9|I7MJT9_TETTS;tr|Q7YUC7|Q7YUC7_TETTH;tr|Q236N6|Q236N6_TETTS;tr|I7MG82|I7MG82_TETTS;tr|I7MGJ7|I7MGJ7_TETTS;tr|Q9U921|Q9U921_TETTH;tr|Q22U50|Q22U50_TETTS;tr|Q23W24|Q23W24_TETTS;tr|Q23BS6|Q23BS6_TETTS;tr|I7M8Q9|I7M8Q9_TETTS;tr|Q23RF3|Q23RF3_TETTS	tr|I7MDZ5|I7MDZ5_TETTS Kinesin-like protein OS=Tetrahymena thermophila (strain SB210) OX=312017 GN=TTHERM_00297200 PE=3 SV=1;tr|Q9U0D5|Q9U0D5_TETTH Kinesin-like protein OS=Tetrahymena thermophila OX=5911 GN=kin1 PE=3 SV=1;tr|I7MJT9|I7MJT9_TETTS Kinesin-lik	13	3	3	3	4.8	86.421	139720	46676	40470	3175.4	1060.8	919.76
tr|I7ME83|I7ME83_TETTS	tr|I7ME83|I7ME83_TETTS 26S proteasome regulatory particle non-ATPase subunit OS=Tetrahymena thermophila (strain SB210) OX=312017 GN=TTHERM_00267990 PE=3 SV=1	1	5	5	5	20.7	36.679	849470	292700	239090	53092	18294	14943
tr|I7MEI2|I7MEI2_TETTS	tr|I7MEI2|I7MEI2_TETTS SPFH domain/band 7 family protein OS=Tetrahymena thermophila (strain SB210) OX=312017 GN=TTHERM_00190730 PE=4 SV=2	1	1	1	1	3.9	41.892	38741	0	7777.7	2421.3	0	486.1
tr|I7MEL5|I7MEL5_TETTS	tr|I7MEL5|I7MEL5_TETTS 26S proteasome regulatory subunit RPN11 OS=Tetrahymena thermophila (strain SB210) OX=312017 GN=TTHERM_00476810 PE=4 SV=1	1	3	3	3	16.7	35.771	399690	177730	110560	36336	16157	10051
tr|I7MEV6|I7MEV6_TETTS	tr|I7MEV6|I7MEV6_TETTS 26S proteasome regulatory subunit OS=Tetrahymena thermophila (strain SB210) OX=312017 GN=TTHERM_00279670 PE=3 SV=1	1	6	5	5	19.3	47.843	615550	184450	145180	21226	6360.4	5006.2
tr|I7MEX7|I7MEX7_TETTS	tr|I7MEX7|I7MEX7_TETTS Uncharacterized protein OS=Tetrahymena thermophila (strain SB210) OX=312017 GN=TTHERM_00283850 PE=4 SV=1	1	2	2	2	10.6	23.596	187150	2851.6	62963	13368	203.69	4497.4
tr|I7MF19|I7MF19_TETTS	tr|I7MF19|I7MF19_TETTS Uncharacterized protein OS=Tetrahymena thermophila (strain SB210) OX=312017 GN=TTHERM_00285560 PE=4 SV=2	1	1	1	1	2.9	51.67	10572	0	3502.7	406.61	0	134.72
tr|I7MF62|I7MF62_TETTS	tr|I7MF62|I7MF62_TETTS WD domain, G-beta repeat protein OS=Tetrahymena thermophila (strain SB210) OX=312017 GN=TTHERM_00133640 PE=4 SV=1	1	1	1	1	2.2	61.698	23088	0	9518.8	855.12	0	352.55
tr|I7MF63|I7MF63_TETTS	tr|I7MF63|I7MF63_TETTS Phenylalanine--tRNA ligase OS=Tetrahymena thermophila (strain SB210) OX=312017 GN=TTHERM_00133690 PE=3 SV=1	1	4	4	4	11.1	59.344	839250	282750	270560	27072	9120.8	8727.6
tr|I7MF70|I7MF70_TETTS	tr|I7MF70|I7MF70_TETTS CCT-epsilon OS=Tetrahymena thermophila (strain SB210) OX=312017 GN=TTHERM_00134970 PE=3 SV=1	1	8	8	8	15.3	58.846	441720	155140	134020	12992	4563	3941.8
tr|I7MF81|I7MF81_TETTS	tr|I7MF81|I7MF81_TETTS 26S protease regulatory subunit 6A OS=Tetrahymena thermophila (strain SB210) OX=312017 GN=TTHERM_00136360 PE=3 SV=1	1	4	4	4	8.5	48.768	280880	117190	90254	12212	5095.4	3924.1
tr|I7MFG1|I7MFG1_TETTS	tr|I7MFG1|I7MFG1_TETTS D-alanyl-D-alanine carboxypeptidase family protein OS=Tetrahymena thermophila (strain SB210) OX=312017 GN=TTHERM_00773310 PE=3 SV=2	1	1	1	1	2.2	67.735	1381900	865030	115220	38386	24029	3200.7
tr|I7MFI3|I7MFI3_TETTS	tr|I7MFI3|I7MFI3_TETTS Mitogen-activated protein kinase OS=Tetrahymena thermophila (strain SB210) OX=312017 GN=TTHERM_00760270 PE=3 SV=1	1	8	8	8	27.1	48.809	656300	333630	118040	28535	14506	5132
tr|I7MFR5|I7MFR5_TETTS	tr|I7MFR5|I7MFR5_TETTS NAD-dependent isocitrate dehydrogenase OS=Tetrahymena thermophila (strain SB210) OX=312017 GN=TTHERM_00723390 PE=3 SV=2	1	6	6	6	22.8	38.799	1088900	473800	346480	57311	24937	18236
tr|I7MFS4|I7MFS4_TETTS	tr|I7MFS4|I7MFS4_TETTS cGMP-dependent protein kinase OS=Tetrahymena thermophila (strain SB210) OX=312017 GN=TTHERM_00723640 PE=3 SV=1	1	1	1	1	2.2	108	26865	2255.5	0	479.72	40.276	0
tr|I7MG47|I7MG47_TETTS	tr|I7MG47|I7MG47_TETTS Serine/threonine-protein phosphatase 2A 55 kDa regulatory subunit B OS=Tetrahymena thermophila (strain SB210) OX=312017 GN=TTHERM_00600480 PE=3 SV=1	1	3	3	3	9.4	48.472	40892	7642.7	797.32	1858.7	347.4	36.242
tr|I7MGE1|I7MGE1_TETTS	tr|I7MGE1|I7MGE1_TETTS Aldehyde dehydrogenase OS=Tetrahymena thermophila (strain SB210) OX=312017 GN=TTHERM_00530250 PE=3 SV=1	1	1	1	1	2.4	56.15	8372.7	0	0	322.03	0	0
tr|I7MGG8|I7MGG8_TETTS	tr|I7MGG8|I7MGG8_TETTS Acyl-CoA dehydrogenase OS=Tetrahymena thermophila (strain SB210) OX=312017 GN=TTHERM_00151470 PE=3 SV=1	1	4	4	4	13.1	44.964	256820	50858	0	12841	2542.9	0
tr|I7MGI2|I7MGI2_TETTS	tr|I7MGI2|I7MGI2_TETTS Elongation factor Tu OS=Tetrahymena thermophila (strain SB210) OX=312017 GN=TTHERM_00151810 PE=3 SV=2	1	11	11	11	31.3	49.102	2668600	776330	907400	98836	28753	33607
tr|I7MGK0|I7MGK0_TETTS	tr|I7MGK0|I7MGK0_TETTS Serine/threonine-protein phosphatase OS=Tetrahymena thermophila (strain SB210) OX=312017 GN=TTHERM_00152190 PE=3 SV=1	1	1	1	1	3.8	42.588	44478	8122.4	14957	3421.4	624.8	1150.5
tr|Q06YR5|Q06YR5_TETTH;tr|I7MGM3|I7MGM3_TETTS	tr|Q06YR5|Q06YR5_TETTH Possibile polyglycylated protein 1 OS=Tetrahymena thermophila OX=5911 GN=PPG1 PE=2 SV=1;tr|I7MGM3|I7MGM3_TETTS DnaK protein OS=Tetrahymena thermophila (strain SB210) OX=312017 GN=TTHERM_00470990 PE=4 SV=2	2	1	1	1	1.4	100.92	12606	0	0	300.15	0	0
tr|Q2I2L8|Q2I2L8_TETTH;tr|I7MGM5|I7MGM5_TETTS	tr|Q2I2L8|Q2I2L8_TETTH C-terminal crystallin fold containing protein 8p OS=Tetrahymena thermophila OX=5911 GN=CCF8 PE=2 SV=1;tr|I7MGM5|I7MGM5_TETTS Uncharacterized protein OS=Tetrahymena thermophila (strain SB210) OX=312017 GN=TTHERM_00471040 PE=3 SV=1	2	8	8	8	9.5	126.14	634640	71974	105350	12444	1411.3	2065.7
tr|I7MGU2|I7MGU2_TETTS	tr|I7MGU2|I7MGU2_TETTS Peptidase M16 inactive domain protein OS=Tetrahymena thermophila (strain SB210) OX=312017 GN=TTHERM_00502380 PE=4 SV=1	1	13	13	13	36.3	57.958	2998700	915710	754720	119950	36628	30189
tr|I7MGX3|I7MGX3_TETTS	tr|I7MGX3|I7MGX3_TETTS Nucleolar protein 5a OS=Tetrahymena thermophila (strain SB210) OX=312017 GN=TTHERM_00558040 PE=3 SV=1	1	2	2	2	4.3	57.988	232360	68581	72452	7745.4	2286	2415.1
tr|I7MH22|I7MH22_TETTS	tr|I7MH22|I7MH22_TETTS Transmembrane protein, putative OS=Tetrahymena thermophila (strain SB210) OX=312017 GN=TTHERM_00421060 PE=4 SV=2	1	3	3	3	13.7	31.284	266310	65560	61653	15665	3856.5	3626.7
tr|I7MH42|I7MH42_TETTS	tr|I7MH42|I7MH42_TETTS Clathrin adapter protein AP-1, mu subunit OS=Tetrahymena thermophila (strain SB210) OX=312017 GN=TTHERM_00545860 PE=3 SV=1	1	1	1	1	2.3	49.495	36755	19105	7775.3	1361.3	707.6	287.97
tr|I7MH91|I7MH91_TETTS	tr|I7MH91|I7MH91_TETTS Cytosol aminopeptidase OS=Tetrahymena thermophila (strain SB210) OX=312017 GN=TTHERM_00058610 PE=3 SV=1	1	3	3	3	8.2	54.745	73742	18147	47195	2731.2	672.1	1747.9
tr|I7MHL9|I7MHL9_TETTS	tr|I7MHL9|I7MHL9_TETTS Proteinase inhibitor I4 serpin OS=Tetrahymena thermophila (strain SB210) OX=312017 GN=TTHERM_00540050 PE=3 SV=1	1	4	4	4	14.4	42.329	470370	183810	96150	18815	7352.6	3846
tr|I7MHM8|I7MHM8_TETTS	tr|I7MHM8|I7MHM8_TETTS Uncharacterized protein OS=Tetrahymena thermophila (strain SB210) OX=312017 GN=TTHERM_00445990 PE=4 SV=2	1	1	1	1	0.7	176.95	20637	4500.4	8846.2	290.66	63.386	124.59
tr|I7MHM9|I7MHM9_TETTS	tr|I7MHM9|I7MHM9_TETTS Acyl-CoA dehydrogenase family protein OS=Tetrahymena thermophila (strain SB210) OX=312017 GN=TTHERM_00540330 PE=3 SV=1	1	4	4	4	6	88.696	170880	56287	26274	3714.7	1223.6	571.17
tr|I7MHP0|I7MHP0_TETTS	tr|I7MHP0|I7MHP0_TETTS Acyl-coenzyme A oxidase OS=Tetrahymena thermophila (strain SB210) OX=312017 GN=TTHERM_00370760 PE=3 SV=1	1	7	7	7	12.5	76.134	318060	133450	53327	9087.4	3812.9	1523.6
tr|I7MHQ3|I7MHQ3_TETTS	tr|I7MHQ3|I7MHQ3_TETTS Uncharacterized protein OS=Tetrahymena thermophila (strain SB210) OX=312017 GN=TTHERM_00535240 PE=4 SV=1	1	5	5	5	15.3	46.158	305310	37170	125150	12212	1486.8	5006.1
tr|I7MHU9|I7MHU9_TETTS	tr|I7MHU9|I7MHU9_TETTS Ribose-phosphate pyrophosphokinase OS=Tetrahymena thermophila (strain SB210) OX=312017 GN=TTHERM_00537300 PE=3 SV=1	1	8	8	8	21.9	43.807	3907700	1506000	1119100	186080	71716	53289
tr|I7MHY7|I7MHY7_TETTS;tr|Q22D05|Q22D05_TETTS	tr|I7MHY7|I7MHY7_TETTS Protein disulfide-isomerase OS=Tetrahymena thermophila (strain SB210) OX=312017 GN=TTHERM_00475140 PE=3 SV=1	2	5	5	5	16.7	53.809	10017000	141850	128360	345430	4891.3	4426.2
tr|I7MI18|I7MI18_TETTS	tr|I7MI18|I7MI18_TETTS Class I/II aminotransferase OS=Tetrahymena thermophila (strain SB210) OX=312017 GN=TTHERM_00140940 PE=3 SV=1	1	1	1	1	2.8	52.677	4186.2	4186.2	0	174.43	174.43	0
tr|I7MI61|I7MI61_TETTS	tr|I7MI61|I7MI61_TETTS Zinc-binding dehydrogenase family oxidoreductase OS=Tetrahymena thermophila (strain SB210) OX=312017 GN=TTHERM_00145230 PE=4 SV=1	1	1	1	1	3.9	39.537	92005	12872	30743	5412	757.19	1808.4
tr|I7MIC7|I7MIC7_TETTS	tr|I7MIC7|I7MIC7_TETTS Rieske iron-sulfur protein, ubiquinol-cytochrome C reductase iron-sulfur subunit OS=Tetrahymena thermophila (strain SB210) OX=312017 GN=TTHERM_00295080 PE=3 SV=1	1	4	4	4	15.2	30.657	417550	133520	65070	24562	7854.2	3827.6
tr|I7MIF3|I7MIF3_TETTS	tr|I7MIF3|I7MIF3_TETTS S-formylglutathione hydrolase OS=Tetrahymena thermophila (strain SB210) OX=312017 GN=TTHERM_00295700 PE=3 SV=1	1	6	6	6	11.6	75.65	451530	187050	145970	12203	5055.3	3945.1
tr|I7MII2|I7MII2_TETTS	tr|I7MII2|I7MII2_TETTS Serine/threonine-protein phosphatase 2A 65 kDa regulatory subunit A alpha OS=Tetrahymena thermophila (strain SB210) OX=312017 GN=TTHERM_00616340 PE=4 SV=1	1	11	11	11	22.2	65.605	1432700	414790	239190	42137	12200	7034.9
tr|I7MIJ7|I7MIJ7_TETTS	tr|I7MIJ7|I7MIJ7_TETTS Uncharacterized protein OS=Tetrahymena thermophila (strain SB210) OX=312017 GN=TTHERM_00399360 PE=4 SV=1	1	3	3	3	13.5	33.155	134680	56996	21290	7922.2	3352.7	1252.3
tr|I7MIK7|I7MIK7_TETTS	tr|I7MIK7|I7MIK7_TETTS Malate dehydrogenase OS=Tetrahymena thermophila (strain SB210) OX=312017 GN=TTHERM_00237500 PE=3 SV=1	1	1	1	1	3.4	38.693	12705	0	12009	847.02	0	800.63
tr|I7MIM2|I7MIM2_TETTS	tr|I7MIM2|I7MIM2_TETTS Glutathione S-transferase OS=Tetrahymena thermophila (strain SB210) OX=312017 GN=TTHERM_00402120 PE=4 SV=1	1	4	4	4	15.1	46.481	145280	28023	66110	8546.1	1648.4	3888.8
tr|I7MIN4|I7MIN4_TETTS	tr|I7MIN4|I7MIN4_TETTS Transmembrane protein, putative OS=Tetrahymena thermophila (strain SB210) OX=312017 GN=TTHERM_00239230 PE=4 SV=2	1	1	1	1	0.4	314.7	1855200	442690	0	25766	6148.5	0
tr|O76221|O76221_TETTH;tr|I7MIR8|I7MIR8_TETTS	tr|O76221|O76221_TETTH Granule lattice protein 7 OS=Tetrahymena thermophila OX=5911 GN=GRL7 PE=2 SV=1;tr|I7MIR8|I7MIR8_TETTS Uncharacterized protein OS=Tetrahymena thermophila (strain SB210) OX=312017 GN=TTHERM_00522600 PE=4 SV=1	2	1	1	1	3.1	42.019	30844	4355.3	0	3855.6	544.41	0
tr|I7MJ25|I7MJ25_TETTS	tr|I7MJ25|I7MJ25_TETTS M16 family peptidase, putative OS=Tetrahymena thermophila (strain SB210) OX=312017 GN=TTHERM_00836690 PE=4 SV=1	1	12	12	12	31.1	52.971	3993900	1166900	1065900	159760	46676	42636
tr|I7MJ35|I7MJ35_TETTS	tr|I7MJ35|I7MJ35_TETTS Electron transfer flavoprotein subunit beta OS=Tetrahymena thermophila (strain SB210) OX=312017 GN=TTHERM_00275750 PE=3 SV=1	1	4	4	4	17.8	28.044	476310	184830	145420	34022	13202	10387
tr|I7MJ84|I7MJ84_TETTS	tr|I7MJ84|I7MJ84_TETTS Transmembrane protein, putative OS=Tetrahymena thermophila (strain SB210) OX=312017 GN=TTHERM_00127260 PE=1 SV=2	1	10	10	9	42	43.856	1620200	407610	432090	81008	20380	21604
tr|I7MJ89|I7MJ89_TETTS	tr|I7MJ89|I7MJ89_TETTS Uncharacterized protein OS=Tetrahymena thermophila (strain SB210) OX=312017 GN=TTHERM_00780850 PE=4 SV=1	1	5	5	5	9.2	74.945	341650	60103	113410	7945.2	1397.8	2637.4
tr|I7MJK1|I7MJK1_TETTS;tr|Q7Z001|Q7Z001_TETTH;sp|P10992|ACT1_TETTH;tr|A0A0F7LH44|A0A0F7LH44_TETTH;tr|A0A0F7LHL7|A0A0F7LHL7_TETTH;tr|A0A0F7LHM2|A0A0F7LHM2_TETTH;tr|A0A0F7LHM6|A0A0F7LHM6_TETTH;tr|K7QQM0|K7QQM0_TETTH;tr|K7QS10|K7QS10_TETTH;tr|K7QU86|K7QU86_TETTH;tr|A0A0F7LHL4|A0A0F7LHL4_TETTH;tr|K7R3N5|K7R3N5_TETTH;tr|A0A0F7LH47|A0A0F7LH47_TETTH;tr|A0A0F7LH50|A0A0F7LH50_TETTH;tr|K7QS11|K7QS11_TETTH;…	tr|I7MJK1|I7MJK1_TETTS Macronuclear actin OS=Tetrahymena thermophila (strain SB210) OX=312017 GN=TTHERM_00190950 PE=3 SV=1;tr|Q7Z001|Q7Z001_TETTH Actin OS=Tetrahymena thermophila OX=5911 PE=2 SV=1;sp|P10992|ACT1_TETTH Actin, macronuclear OS=Tetrahymena the	32	15	15	15	55.6	42.042	9750000	2797000	2342300	443180	127130	106470
tr|I7MJM5|I7MJM5_TETTS	tr|I7MJM5|I7MJM5_TETTS 26S proteasome regulatory subunit RPN7 OS=Tetrahymena thermophila (strain SB210) OX=312017 GN=TTHERM_00191240 PE=4 SV=1	1	8	8	8	29.2	37.191	951370	318670	268420	55963	18745	15789
tr|I7MK03|I7MK03_TETTS	tr|I7MK03|I7MK03_TETTS 6-phosphofructokinase OS=Tetrahymena thermophila (strain SB210) OX=312017 GN=TTHERM_00338470 PE=4 SV=2	1	2	2	2	4.6	74.19	32769	2545.1	0	910.26	70.698	0
tr|I7MK09|I7MK09_TETTS	tr|I7MK09|I7MK09_TETTS H(+)-transporting two-sector ATPase OS=Tetrahymena thermophila (strain SB210) OX=312017 GN=TTHERM_00339640 PE=3 SV=1	1	17	17	17	34.8	69.079	4869000	1399700	1313300	131590	37829	35494
tr|I7MK10|I7MK10_TETTS	tr|I7MK10|I7MK10_TETTS Endo-1,4-beta-xylanase xylA, putative OS=Tetrahymena thermophila (strain SB210) OX=312017 GN=TTHERM_00497780 PE=4 SV=2	1	1	1	1	1.4	96.541	576220	387730	84577	14054	9456.9	2062.9
tr|I7MK87|I7MK87_TETTS	tr|I7MK87|I7MK87_TETTS Acetyl-CoA acetyltransferase OS=Tetrahymena thermophila (strain SB210) OX=312017 GN=TTHERM_00277470 PE=3 SV=2	1	2	2	2	4.2	54.947	168630	0	91749	6745.2	0	3670
tr|I7MKD2|I7MKD2_TETTS	tr|I7MKD2|I7MKD2_TETTS NAD-dependent isocitrate dehydrogenase OS=Tetrahymena thermophila (strain SB210) OX=312017 GN=TTHERM_00344030 PE=3 SV=2	1	8	8	8	22.2	55.555	1701500	294840	543280	94530	16380	30182
tr|I7MKJ4|I7MKJ4_TETTS	tr|I7MKJ4|I7MKJ4_TETTS Cytochrome C peroxidase OS=Tetrahymena thermophila (strain SB210) OX=312017 GN=TTHERM_00133500 PE=3 SV=1	1	1	1	1	4.8	33.016	39181	6942.4	14554	2448.8	433.9	909.6
tr|I7ML51|I7ML51_TETTS	tr|I7ML51|I7ML51_TETTS Acyl carrier reductase OS=Tetrahymena thermophila (strain SB210) OX=312017 GN=TTHERM_00317440 PE=3 SV=1	1	9	9	9	26.3	48.9	1640700	443440	491480	60767	16424	18203
tr|I7ML77|I7ML77_TETTS	tr|I7ML77|I7ML77_TETTS CCT-beta OS=Tetrahymena thermophila (strain SB210) OX=312017 GN=TTHERM_00149340 PE=3 SV=2	1	7	7	7	17.5	58.993	846680	277980	224260	26459	8687	7008.1
tr|I7MLC5|I7MLC5_TETTS	tr|I7MLC5|I7MLC5_TETTS Cilia- and flagella-associated protein 36 OS=Tetrahymena thermophila (strain SB210) OX=312017 GN=TTHERM_00563970 PE=3 SV=2	1	1	1	1	1.1	94.593	97180	0	0	2776.6	0	0
tr|I7MLH2|I7MLH2_TETTS	tr|I7MLH2|I7MLH2_TETTS NAD-dependent epimerase/dehydratase family protein OS=Tetrahymena thermophila (strain SB210) OX=312017 GN=TTHERM_00557760 PE=4 SV=2	1	4	4	4	15.7	41.32	168550	67539	29257	8026.2	3216.1	1393.2
tr|I7MLL5|I7MLL5_TETTS	tr|I7MLL5|I7MLL5_TETTS 26S proteasome non-ATPase regulatory subunit OS=Tetrahymena thermophila (strain SB210) OX=312017 GN=TTHERM_00578940 PE=3 SV=2	1	8	8	8	17.2	51.011	1237000	427680	311480	65106	22510	16394
tr|I7MLV8|I7MLV8_TETTS	tr|I7MLV8|I7MLV8_TETTS ADP-ribosylation factor(Arf)/Arf-like (Arl) small GTPase family protein OS=Tetrahymena thermophila (strain SB210) OX=312017 GN=TTHERM_00446390 PE=3 SV=1	1	7	7	1	47.9	21.827	1658200	490140	515700	138190	40845	42975
tr|I7MLW4|I7MLW4_TETTS	tr|I7MLW4|I7MLW4_TETTS Succinate--CoA ligase [ADP-forming] subunit beta, mitochondrial OS=Tetrahymena thermophila (strain SB210) OX=312017 GN=TTHERM_00535260 PE=3 SV=1	1	15	15	15	41.5	46.659	2705100	1677300	557580	96609	59905	19914
tr|I7MM12|I7MM12_TETTS	tr|I7MM12|I7MM12_TETTS Transmembrane protein, putative OS=Tetrahymena thermophila (strain SB210) OX=312017 GN=TTHERM_00475310 PE=4 SV=1	1	2	2	2	4.2	60.916	74698	26193	15355	2667.8	935.47	548.4
tr|I7MM42|I7MM42_TETTS	tr|I7MM42|I7MM42_TETTS Endoplasmic reticulum-intermediate compartment protein OS=Tetrahymena thermophila (strain SB210) OX=312017 GN=TTHERM_00455630 PE=4 SV=1	1	2	2	2	8	38.991	44446	0	0	3703.8	0	0
tr|I7MM56|I7MM56_TETTS	tr|I7MM56|I7MM56_TETTS CTP synthase OS=Tetrahymena thermophila (strain SB210) OX=312017 GN=TTHERM_00459390 PE=3 SV=1	1	11	11	11	22.7	69.107	1107900	588090	238870	36929	19603	7962.4
tr|I7MM64|I7MM64_TETTS	tr|I7MM64|I7MM64_TETTS Pyridine nucleotide-disulfide oxidoreductase OS=Tetrahymena thermophila (strain SB210) OX=312017 GN=TTHERM_00299570 PE=4 SV=1	1	6	6	6	12.9	69.911	218920	21728	33400	6633.8	658.41	1012.1
tr|I7MM90|I7MM90_TETTS	tr|I7MM90|I7MM90_TETTS Small nuclear ribonucleoprotein helicase OS=Tetrahymena thermophila (strain SB210) OX=312017 GN=TTHERM_00302060 PE=4 SV=2	1	1	1	1	0.4	255.95	4636.4	0	0	38.317	0	0
tr|I7MMH4|I7MMH4_TETTS	tr|I7MMH4|I7MMH4_TETTS 26S proteasome regulatory ATPase subunit 10B OS=Tetrahymena thermophila (strain SB210) OX=312017 GN=TTHERM_00469100 PE=3 SV=1	1	7	7	7	22.1	44.223	1572400	491900	451030	71472	22359	20502
tr|I7MMI7|I7MMI7_TETTS	tr|I7MMI7|I7MMI7_TETTS ATP synthase F1, delta subunit OS=Tetrahymena thermophila (strain SB210) OX=312017 GN=TTHERM_00684790 PE=1 SV=1	1	3	3	3	21.9	24.751	206300	79800	42324	22922	8866.6	4702.7
tr|I7MMZ4|I7MMZ4_TETTS	tr|I7MMZ4|I7MMZ4_TETTS AMP-binding enzyme family protein OS=Tetrahymena thermophila (strain SB210) OX=312017 GN=TTHERM_00678360 PE=4 SV=1	1	2	2	2	3.9	73.943	26492	0	7667.3	735.89	0	212.98
tr|I7MN19|I7MN19_TETTS;sp|P54410|TCPH_TETTH	tr|I7MN19|I7MN19_TETTS CCT-eta OS=Tetrahymena thermophila (strain SB210) OX=312017 GN=TTHERM_00497960 PE=3 SV=1;sp|P54410|TCPH_TETTH T-complex protein 1 subunit eta (Fragment) OS=Tetrahymena thermophila OX=5911 PE=3 SV=1	2	10	10	10	23.7	61.529	1584500	602550	345240	49515	18830	10789
tr|Q240R0|Q240R0_TETTS;tr|O76218|O76218_TETTH	tr|Q240R0|Q240R0_TETTS Granule lattice protein OS=Tetrahymena thermophila (strain SB210) OX=312017 GN=TTHERM_00624730 PE=4 SV=2;tr|O76218|O76218_TETTH Granule lattice protein 3 OS=Tetrahymena thermophila OX=5911 GN=GRL3 PE=2 SV=1	2	5	5	5	17.5	41.463	522390	121620	30379	43532	10135	2531.6
tr|Q240R1|Q240R1_TETTS;tr|O76219|O76219_TETTH	tr|Q240R1|Q240R1_TETTS Granule lattice protein OS=Tetrahymena thermophila (strain SB210) OX=312017 GN=TTHERM_00624720 PE=4 SV=3;tr|O76219|O76219_TETTH Granule lattice protein 4 OS=Tetrahymena thermophila OX=5911 GN=GRL4 PE=2 SV=1	2	6	6	6	14.2	43.262	736500	104640	87603	52607	7474.5	6257.4
tr|Q23FC8|Q23FC8_TETTS;tr|Q22XM3|Q22XM3_TETTS;tr|O76220|O76220_TETTH	tr|Q23FC8|Q23FC8_TETTS Granule lattice protein OS=Tetrahymena thermophila (strain SB210) OX=312017 GN=TTHERM_00378890 PE=4 SV=3;tr|Q22XM3|Q22XM3_TETTS Granule lattice protein OS=Tetrahymena thermophila (strain SB210) OX=312017 GN=TTHERM_01018540 PE=4 SV=1;	3	2	2	2	6.4	41.509	247790	36773	46703	22527	3343	4245.7
tr|W7XLS2|W7XLS2_TETTS;tr|Q22WV8|Q22WV8_TETTS;tr|Q22PL2|Q22PL2_TETTS;tr|Q239N7|Q239N7_TETTS;tr|W7XLA2|W7XLA2_TETTS;tr|Q239P0|Q239P0_TETTS;tr|Q23U08|Q23U08_TETTS;tr|Q23UH2|Q23UH2_TETTS;tr|Q229A3|Q229A3_TETTS;tr|W7XL22|W7XL22_TETTS;tr|W7XH76|W7XH76_TETTS;tr|W7XDH3|W7XDH3_TETTS;tr|W7XJK5|W7XJK5_TETTS;tr|X1W3Q6|X1W3Q6_TETTS;tr|Q232S9|Q232S9_TETTS;tr|Q22WV9|Q22WV9_TETTS;tr|Q23NL8|Q23NL8_TETTS;tr|Q22AU…	tr|W7XLS2|W7XLS2_TETTS Kinase domain protein (Fragment) OS=Tetrahymena thermophila (strain SB210) OX=312017 GN=TTHERM_002653385 PE=4 SV=1;tr|Q22WV8|Q22WV8_TETTS Kinase domain protein OS=Tetrahymena thermophila (strain SB210) OX=312017 GN=TTHERM_01332050 PE	32	1	1	1	5.4	21.846	17988	0	0	2569.7	0	0
tr|Q228N4|Q228N4_TETTS	tr|Q228N4|Q228N4_TETTS Uncharacterized protein OS=Tetrahymena thermophila (strain SB210) OX=312017 GN=TTHERM_01528510 PE=1 SV=2	1	8	8	8	35.2	31.63	1367200	466080	319380	80426	27416	18787
tr|Q228X0|Q228X0_TETTS	tr|Q228X0|Q228X0_TETTS Clusterin-associated protein OS=Tetrahymena thermophila (strain SB210) OX=312017 GN=TTHERM_01474510 PE=3 SV=1	1	1	1	1	3	46.263	79527	17420	22338	3457.7	757.4	971.21
tr|Q229J5|Q229J5_TETTS	tr|Q229J5|Q229J5_TETTS Protein kinase OS=Tetrahymena thermophila (strain SB210) OX=312017 GN=TTHERM_01394370 PE=4 SV=2	1	1	1	1	1.6	79.156	18671	3684.2	0	583.45	115.13	0
tr|Q229R4|Q229R4_TETTS	tr|Q229R4|Q229R4_TETTS Coatomer subunit alpha OS=Tetrahymena thermophila (strain SB210) OX=312017 GN=TTHERM_01345820 PE=4 SV=1	1	1	1	1	1.8	140.68	10605	0	0	179.74	0	0
tr|Q229R5|Q229R5_TETTS	tr|Q229R5|Q229R5_TETTS Serine/threonine-protein phosphatase OS=Tetrahymena thermophila (strain SB210) OX=312017 GN=TTHERM_01345810 PE=3 SV=1	1	1	1	1	4.2	36.114	69563	26148	0	4091.9	1538.1	0
tr|Q229R9|Q229R9_TETTS	tr|Q229R9|Q229R9_TETTS Uncharacterized protein OS=Tetrahymena thermophila (strain SB210) OX=312017 GN=TTHERM_01345770 PE=4 SV=2	1	2	2	2	4.2	72.553	67688	0	8709.4	2417.4	0	311.05
tr|Q229S0|Q229S0_TETTS	tr|Q229S0|Q229S0_TETTS ADP-ribosylation factor(Arf)/Arf-like (ARL) small GTPase family protein OS=Tetrahymena thermophila (strain SB210) OX=312017 GN=TTHERM_01345760 PE=3 SV=1	1	2	2	2	15.7	19.87	83843	31442	27245	6986.9	2620.2	2270.4
tr|Q229Z2|Q229Z2_TETTS	tr|Q229Z2|Q229Z2_TETTS Fumarate hydratase OS=Tetrahymena thermophila (strain SB210) OX=312017 GN=TTHERM_01308050 PE=3 SV=1	1	1	1	1	2.7	53.572	21828	0	0	1148.8	0	0
tr|Q22A09|Q22A09_TETTS	tr|Q22A09|Q22A09_TETTS Kinase domain protein OS=Tetrahymena thermophila (strain SB210) OX=312017 GN=TTHERM_01298560 PE=4 SV=2	1	3	3	3	4.5	87.178	286510	68877	76541	11020	2649.1	2943.9
tr|Q22A25|Q22A25_TETTS	tr|Q22A25|Q22A25_TETTS COP9 signalosome complex subunit 3, putative OS=Tetrahymena thermophila (strain SB210) OX=312017 GN=TTHERM_01289160 PE=4 SV=2	1	1	1	1	3.6	46.367	26357	15469	0	1098.2	644.56	0
tr|Q22A67|Q22A67_TETTS;tr|A5Z288|A5Z288_TETTH	tr|Q22A67|Q22A67_TETTS Dynein heavy chain, outer arm protein OS=Tetrahymena thermophila (strain SB210) OX=312017 GN=TTHERM_01276420 PE=1 SV=1	2	8	8	8	2.1	533.65	169180	4902.3	0	663.45	19.225	0
tr|Q22A77|Q22A77_TETTS	tr|Q22A77|Q22A77_TETTS Uncharacterized protein OS=Tetrahymena thermophila (strain SB210) OX=312017 GN=TTHERM_01276320 PE=1 SV=2	1	4	4	4	4.8	125.25	147970	44394	23685	3082.7	924.88	493.44
tr|Q22AK9|Q22AK9_TETTS	tr|Q22AK9|Q22AK9_TETTS Elongation factor G, mitochondrial OS=Tetrahymena thermophila (strain SB210) OX=312017 GN=TTHERM_01194660 PE=3 SV=2	1	4	4	4	7.3	83.27	356480	100810	126900	9140.5	2585	3254
tr|Q22AP7|Q22AP7_TETTS;tr|Q23FN7|Q23FN7_TETTS	tr|Q22AP7|Q22AP7_TETTS Casein kinase I OS=Tetrahymena thermophila (strain SB210) OX=312017 GN=TTHERM_01179780 PE=3 SV=2	2	4	4	4	13.6	38.861	182380	83406	13127	9598.8	4389.8	690.87
tr|Q22AS2|Q22AS2_TETTS	tr|Q22AS2|Q22AS2_TETTS Serine/Threonine kinase OS=Tetrahymena thermophila (strain SB210) OX=312017 GN=TTHERM_01164160 PE=4 SV=1	1	1	1	1	1.3	119.57	236940	87084	59250	4556.6	1674.7	1139.4
tr|Q22AX6|Q22AX6_TETTS	tr|Q22AX6|Q22AX6_TETTS Tetratricopeptide repeat protein OS=Tetrahymena thermophila (strain SB210) OX=312017 GN=TTHERM_01142720 PE=4 SV=2	1	2	2	2	3.2	85.24	45778	8392.3	8245.2	1307.9	239.78	235.58
tr|Q22B43|Q22B43_TETTS	tr|Q22B43|Q22B43_TETTS Ubiquitin-conjugating enzyme OS=Tetrahymena thermophila (strain SB210) OX=312017 GN=TTHERM_01123950 PE=3 SV=2	1	1	1	1	9.9	17.091	42966	17787	9208.7	5370.8	2223.4	1151.1
tr|Q22B55|Q22B55_TETTS	tr|Q22B55|Q22B55_TETTS Protein YIPF OS=Tetrahymena thermophila (strain SB210) OX=312017 GN=TTHERM_01123830 PE=3 SV=1	1	1	1	1	6.8	24.553	68308	24941	0	11385	4156.8	0
tr|Q22B59|Q22B59_TETTS	tr|Q22B59|Q22B59_TETTS Transmembrane protein, putative OS=Tetrahymena thermophila (strain SB210) OX=312017 GN=TTHERM_01109960 PE=4 SV=1	1	1	1	1	9.3	15.198	13332	0	0	2222.1	0	0
tr|Q22BC2|Q22BC2_TETTS	tr|Q22BC2|Q22BC2_TETTS Emp24/gp25L/p24 family protein OS=Tetrahymena thermophila (strain SB210) OX=312017 GN=TTHERM_01107340 PE=3 SV=2	1	1	1	1	5.6	24.348	58108	13185	9958.5	5810.8	1318.5	995.85
tr|Q22BT1|Q22BT1_TETTS;tr|Q27854|Q27854_TETTH	tr|Q22BT1|Q22BT1_TETTS Sarco/endoplasmic reticulum calcium-translocating P-type ATPase OS=Tetrahymena thermophila (strain SB210) OX=312017 GN=TTHERM_01084370 PE=4 SV=2	2	13	13	13	18	115.28	1107200	180850	218200	21710	3546.1	4278.4
tr|Q22BU7|Q22BU7_TETTS	tr|Q22BU7|Q22BU7_TETTS Intraflagellar transporter OS=Tetrahymena thermophila (strain SB210) OX=312017 GN=TTHERM_01084200 PE=4 SV=3	1	2	2	2	3.2	86.301	73691	14608	12981	1889.5	374.56	332.85
tr|Q22BY0|Q22BY0_TETTS	tr|Q22BY0|Q22BY0_TETTS Chromosome condensation regulator RCC1 repeat protein OS=Tetrahymena thermophila (strain SB210) OX=312017 GN=TTHERM_01082880 PE=4 SV=2	1	1	1	1	0.7	229.64	9535300	2734300	2993200	108360	31071	34014
tr|Q22C77|Q22C77_TETTS	tr|Q22C77|Q22C77_TETTS Calcium-dependent kinase OS=Tetrahymena thermophila (strain SB210) OX=312017 GN=TTHERM_01075630 PE=4 SV=1	1	1	1	1	1.7	60.442	70222	0	29435	2600.8	0	1090.2
tr|Q22CI6|Q22CI6_TETTS	tr|Q22CI6|Q22CI6_TETTS Uncharacterized protein OS=Tetrahymena thermophila (strain SB210) OX=312017 GN=TTHERM_01043230 PE=4 SV=1	1	1	1	1	0.7	217.71	3160200	1188300	1080900	46473	17475	15896
tr|Q22CV2|Q22CV2_TETTS	tr|Q22CV2|Q22CV2_TETTS Calmodulin-domain kinase OS=Tetrahymena thermophila (strain SB210) OX=312017 GN=TTHERM_01015890 PE=4 SV=2	1	1	1	1	1.6	57.9	3929.6	335.59	0	151.14	12.907	0
tr|Q22CW1|Q22CW1_TETTS	tr|Q22CW1|Q22CW1_TETTS Chaperone protein DnaK OS=Tetrahymena thermophila (strain SB210) OX=312017 GN=TTHERM_01014750 PE=3 SV=2	1	3	3	3	6.3	70.549	213840	65921	59574	5779.4	1781.6	1610.1
tr|Q22CX9|Q22CX9_TETTS	tr|Q22CX9|Q22CX9_TETTS D-isomer specific 2-hydroxyacid dehydrogenase NAD-binding protein OS=Tetrahymena thermophila (strain SB210) OX=312017 GN=TTHERM_01014570 PE=3 SV=2	1	3	3	3	9.5	40.518	219500	78017	63851	11553	4106.2	3360.6
tr|Q2I2L6|Q2I2L6_TETTH;tr|Q22D31|Q22D31_TETTS	tr|Q2I2L6|Q2I2L6_TETTH C-terminal crystallin fold containing protein 4p OS=Tetrahymena thermophila OX=5911 GN=CCF4 PE=2 SV=1;tr|Q22D31|Q22D31_TETTS Carboxy-terminal crystallin fold protein OS=Tetrahymena thermophila (strain SB210) OX=312017 GN=TTHERM_01002	2	6	6	6	19.9	48.349	978070	216560	157320	48904	10828	7865.9
tr|Q2I2L5|Q2I2L5_TETTH;tr|Q22D32|Q22D32_TETTS	tr|Q2I2L5|Q2I2L5_TETTH C-terminal crystallin fold containing protein 3p OS=Tetrahymena thermophila OX=5911 GN=CCF3 PE=2 SV=1;tr|Q22D32|Q22D32_TETTS Carboxy-terminal crystallin fold protein OS=Tetrahymena thermophila (strain SB210) OX=312017 GN=TTHERM_01002	2	10	10	10	30.2	48.095	2788100	666040	417170	132770	31716	19865
tr|Q22DB9|Q22DB9_TETTS	tr|Q22DB9|Q22DB9_TETTS Histone deacetylation protein RXT3 OS=Tetrahymena thermophila (strain SB210) OX=312017 GN=TTHERM_00992830 PE=4 SV=2	1	1	1	1	3.6	72.03	63431000	157930	63024000	2114400	5264.5	2100800
tr|Q8MU83|Q8MU83_TETTH;tr|Q22DR0|Q22DR0_TETTS	tr|Q8MU83|Q8MU83_TETTH Elongation factor 2 OS=Tetrahymena thermophila OX=5911 PE=3 SV=2;tr|Q22DR0|Q22DR0_TETTS Elongation factor 2, putative OS=Tetrahymena thermophila (strain SB210) OX=312017 GN=TTHERM_00938820 PE=3 SV=2	2	28	28	28	43.6	93.439	10499000	3727500	2858800	238620	84717	64973
tr|Q22DR7|Q22DR7_TETTS	tr|Q22DR7|Q22DR7_TETTS DnaJ domain protein OS=Tetrahymena thermophila (strain SB210) OX=312017 GN=TTHERM_00938750 PE=4 SV=1	1	2	2	2	8.2	36.818	85291	15701	39752	5330.7	981.3	2484.5
tr|Q22DV8|Q22DV8_TETTS	tr|Q22DV8|Q22DV8_TETTS Acyl carrier protein, putative OS=Tetrahymena thermophila (strain SB210) OX=312017 GN=TTHERM_00927010 PE=1 SV=3	1	1	1	1	8.6	17.388	18468	0	0	2638.3	0	0
tr|Q22DW1|Q22DW1_TETTS	tr|Q22DW1|Q22DW1_TETTS Acetyl-CoA acyltransferase OS=Tetrahymena thermophila (strain SB210) OX=312017 GN=TTHERM_00926980 PE=3 SV=2	1	13	13	13	31.3	56.493	5969000	2954000	1831900	205830	101860	63168
tr|Q22DW3|Q22DW3_TETTS	tr|Q22DW3|Q22DW3_TETTS Uncharacterized protein OS=Tetrahymena thermophila (strain SB210) OX=312017 GN=TTHERM_00926960 PE=4 SV=1	1	11	11	11	23.4	69.629	492420	50467	50573	15388	1577.1	1580.4
tr|Q22E24|Q22E24_TETTS	tr|Q22E24|Q22E24_TETTS Lipid-A-disaccharide synthase OS=Tetrahymena thermophila (strain SB210) OX=312017 GN=TTHERM_00925340 PE=4 SV=1	1	3	3	3	8.5	59.233	159710	65466	41101	6654.5	2727.7	1712.5
tr|Q22E31|Q22E31_TETTS	tr|Q22E31|Q22E31_TETTS AP-2 complex subunit alpha OS=Tetrahymena thermophila (strain SB210) OX=312017 GN=TTHERM_00896070 PE=3 SV=2	1	1	1	1	1.3	109.26	66439	13387	16300	1302.7	262.49	319.61
tr|Q22E69|Q22E69_TETTS	tr|Q22E69|Q22E69_TETTS LA motif RNA-binding domain protein OS=Tetrahymena thermophila (strain SB210) OX=312017 GN=TTHERM_00895580 PE=4 SV=3	1	1	1	1	1.5	70.307	830220	165220	1041.7	37737	7510.1	47.349
tr|Q22EB8|Q22EB8_TETTS	tr|Q22EB8|Q22EB8_TETTS Uncharacterized protein OS=Tetrahymena thermophila (strain SB210) OX=312017 GN=TTHERM_00835100 PE=4 SV=1	1	4	4	4	13.5	36.362	175770	30863	51132	7989.4	1402.9	2324.2
tr|Q22EC6|Q22EC6_TETTS	tr|Q22EC6|Q22EC6_TETTS Signal peptide peptidase OS=Tetrahymena thermophila (strain SB210) OX=312017 GN=TTHERM_00835020 PE=3 SV=2	1	1	1	1	3.2	42.501	28803	6135.9	0	2057.4	438.28	0
tr|Q22EJ0|Q22EJ0_TETTS	tr|Q22EJ0|Q22EJ0_TETTS WD domain, G-beta repeat protein OS=Tetrahymena thermophila (strain SB210) OX=312017 GN=TTHERM_00826780 PE=4 SV=2	1	1	1	1	2.5	96.003	1438300	26172	116090	32688	594.82	2638.5
tr|Q22F22|Q22F22_TETTS	tr|Q22F22|Q22F22_TETTS V-type ATPase, D subunit OS=Tetrahymena thermophila (strain SB210) OX=312017 GN=TTHERM_00821870 PE=3 SV=2	1	6	6	6	27.8	28.745	731430	235830	207130	52245	16845	14795
tr|Q22FX8|Q22FX8_TETTS	tr|Q22FX8|Q22FX8_TETTS Protein phosphatase 2C, putative OS=Tetrahymena thermophila (strain SB210) OX=312017 GN=TTHERM_00721790 PE=4 SV=3	1	7	7	7	23	52.948	348120	150900	42135	12004	5203.6	1452.9
tr|Q22GX4|Q22GX4_TETTS;tr|A0A0F7LHR2|A0A0F7LHR2_TETTH;tr|A0A0F7LDS0|A0A0F7LDS0_TETTH	tr|Q22GX4|Q22GX4_TETTS Elongation factor 1-alpha OS=Tetrahymena thermophila (strain SB210) OX=312017 GN=TTHERM_00655820 PE=3 SV=1;tr|A0A0F7LHR2|A0A0F7LHR2_TETTH Translation elongation factor 1 subunit alpha (Fragment) OS=Tetrahymena thermophila OX=5911 GN=	3	11	11	11	33.8	48.36	33607000	9815000	9208300	1344300	392600	368330
tr|Q22GY0|Q22GY0_TETTS	tr|Q22GY0|Q22GY0_TETTS Transmembrane protein, putative OS=Tetrahymena thermophila (strain SB210) OX=312017 GN=TTHERM_00655720 PE=4 SV=1	1	1	1	1	8.9	18.828	3490.5	0	0	436.31	0	0
tr|Q22HK2|Q22HK2_TETTS	tr|Q22HK2|Q22HK2_TETTS Uncharacterized protein OS=Tetrahymena thermophila (strain SB210) OX=312017 GN=TTHERM_00637010 PE=4 SV=2	1	11	11	11	9.3	168.38	755770	136250	320230	7634.1	1376.3	3234.7
tr|Q52H29|Q52H29_TETTH;tr|Q22HK6|Q22HK6_TETTS	tr|Q52H29|Q52H29_TETTH 60S acidic ribosomal protein P0 OS=Tetrahymena thermophila OX=5911 PE=2 SV=1;tr|Q22HK6|Q22HK6_TETTS 60S acidic ribosomal protein P0 OS=Tetrahymena thermophila (strain SB210) OX=312017 GN=TTHERM_00636970 PE=3 SV=2	2	6	6	6	27.2	35.463	3068600	645800	1110600	180500	37988	65327
tr|Q22HL7|Q22HL7_TETTS	tr|Q22HL7|Q22HL7_TETTS tRNA (guanine(26)-N(2))-dimethyltransferase OS=Tetrahymena thermophila (strain SB210) OX=312017 GN=TTHERM_00636860 PE=3 SV=2	1	3	3	3	6.2	69.33	99896	17162	23860	3222.5	553.63	769.67
tr|Q22KA9|Q22KA9_TETTS	tr|Q22KA9|Q22KA9_TETTS Tetratricopeptide repeat protein OS=Tetrahymena thermophila (strain SB210) OX=312017 GN=TTHERM_00313720 PE=3 SV=1	1	2	2	2	4	74.872	114210	98859	1184.3	2928.6	2534.9	30.367
tr|Q22KB8|Q22KB8_TETTS	tr|Q22KB8|Q22KB8_TETTS Kinesin motor catalytic domain protein OS=Tetrahymena thermophila (strain SB210) OX=312017 GN=TTHERM_00313630 PE=3 SV=2	1	1	1	1	0.6	180.92	93742	0	0	997.25	0	0
tr|Q22KH2|Q22KH2_TETTS	tr|Q22KH2|Q22KH2_TETTS Oxysterol-binding protein OS=Tetrahymena thermophila (strain SB210) OX=312017 GN=TTHERM_00313090 PE=3 SV=2	1	2	2	2	4.6	47.48	82725	0	25197	3939.3	0	1199.9
tr|Q22KH3|Q22KH3_TETTS	tr|Q22KH3|Q22KH3_TETTS Acyl-CoA dehydrogenase OS=Tetrahymena thermophila (strain SB210) OX=312017 GN=TTHERM_00313080 PE=3 SV=2	1	6	6	6	20.4	46.5	1417400	382630	405560	64428	17392	18435
tr|Q22KK9|Q22KK9_TETTS	tr|Q22KK9|Q22KK9_TETTS Eukaryotic porin protein OS=Tetrahymena thermophila (strain SB210) OX=312017 GN=TTHERM_00312720 PE=3 SV=2	1	2	2	2	8.2	41.409	118610	28126	30123	5930.4	1406.3	1506.2
tr|Q22KS9|Q22KS9_TETTS	tr|Q22KS9|Q22KS9_TETTS Membrane protease stomatin prohibitin family protein OS=Tetrahymena thermophila (strain SB210) OX=312017 GN=TTHERM_00312000 PE=3 SV=1	1	1	1	1	5.2	32.441	13801	0	0	726.38	0	0
tr|Q22M56|Q22M56_TETTS	tr|Q22M56|Q22M56_TETTS ADP/ATP translocase OS=Tetrahymena thermophila (strain SB210) OX=312017 GN=TTHERM_00037640 PE=3 SV=1	1	5	5	5	18	35.034	515270	78827	131440	28626	4379.3	7302.1
tr|Q22M85|Q22M85_TETTS	tr|Q22M85|Q22M85_TETTS DNA-directed RNA polymerase subunit OS=Tetrahymena thermophila (strain SB210) OX=312017 GN=TTHERM_00037340 PE=3 SV=2	1	1	1	1	0.5	167.53	344950	0	195890	4479.9	0	2544
tr|Q22MB3|Q22MB3_TETTS	tr|Q22MB3|Q22MB3_TETTS CCT-theta OS=Tetrahymena thermophila (strain SB210) OX=312017 GN=TTHERM_00037060 PE=3 SV=3	1	8	8	8	12.3	99.12	750680	289570	191210	15014	5791.3	3824.1
tr|Q22MB4|Q22MB4_TETTS	tr|Q22MB4|Q22MB4_TETTS T-complex protein 1 subunit delta OS=Tetrahymena thermophila (strain SB210) OX=312017 GN=TTHERM_00037050 PE=3 SV=3	1	11	11	11	27.3	58.476	1806000	741530	396750	56437	23173	12399
tr|Q22MG2|Q22MG2_TETTS	tr|Q22MG2|Q22MG2_TETTS Protein transporter Sec61 alpha subunit OS=Tetrahymena thermophila (strain SB210) OX=312017 GN=TTHERM_00035580 PE=3 SV=3	1	3	3	3	6.9	52.151	346950	54159	85922	21684	3384.9	5370.1
tr|Q22MV4|Q22MV4_TETTS	tr|Q22MV4|Q22MV4_TETTS Malate dehydrogenase OS=Tetrahymena thermophila (strain SB210) OX=312017 GN=TTHERM_00030190 PE=3 SV=1	1	3	3	3	10.9	37.847	267060	0	177800	11611	0	7730.4
tr|Q22N00|Q22N00_TETTS	tr|Q22N00|Q22N00_TETTS Ribosomal protein L11, amine-terminal domain protein OS=Tetrahymena thermophila (strain SB210) OX=312017 GN=TTHERM_00028740 PE=3 SV=2	1	5	5	5	35.4	17.849	1338700	305660	341500	133870	30566	34150
tr|Q22N79|Q22N79_TETTS	tr|Q22N79|Q22N79_TETTS Serine/Threonine kinase domain protein OS=Tetrahymena thermophila (strain SB210) OX=312017 GN=TTHERM_00213560 PE=4 SV=1	1	2	2	2	5	65.327	47110	8020.2	18419	1239.7	211.06	484.72
tr|Q22NU3|Q22NU3_TETTS	tr|Q22NU3|Q22NU3_TETTS Transcription factor iib protein, putative OS=Tetrahymena thermophila (strain SB210) OX=312017 GN=TTHERM_00418580 PE=4 SV=2	1	3	3	3	15.4	22.946	271990	87066	58748	22666	7255.5	4895.7
tr|Q22NW7|Q22NW7_TETTS	tr|Q22NW7|Q22NW7_TETTS ATP-dependent metalloprotease FtsH OS=Tetrahymena thermophila (strain SB210) OX=312017 GN=TTHERM_00418280 PE=3 SV=1	1	3	3	3	3.9	100.8	57220	843.93	0	1100.4	16.229	0
tr|Q22NX4|Q22NX4_TETTS	tr|Q22NX4|Q22NX4_TETTS PAS domain S-box protein, putative OS=Tetrahymena thermophila (strain SB210) OX=312017 GN=TTHERM_00418210 PE=4 SV=2	1	1	1	1	0.6	179.5	274110	118440	54563	3704.1	1600.5	737.34
tr|Q22P47|Q22P47_TETTS	tr|Q22P47|Q22P47_TETTS Enoyl-CoA hydratase/isomerase OS=Tetrahymena thermophila (strain SB210) OX=312017 GN=TTHERM_00414440 PE=1 SV=2	1	6	6	6	5	171.24	166520	19456	35643	2055.8	240.2	440.03
tr|Q22PA7|Q22PA7_TETTS	tr|Q22PA7|Q22PA7_TETTS Transitional endoplasmic reticulum ATPase, putative OS=Tetrahymena thermophila (strain SB210) OX=312017 GN=TTHERM_00365340 PE=4 SV=2	1	5	5	5	8.6	88.514	367110	160450	76863	7492	3274.6	1568.6
tr|Q22PC2|Q22PC2_TETTS	tr|Q22PC2|Q22PC2_TETTS ADP/ATP translocase OS=Tetrahymena thermophila (strain SB210) OX=312017 GN=TTHERM_00363210 PE=3 SV=1	1	3	3	3	12.8	34.085	328510	84489	67020	14283	3673.4	2913.9
tr|Q22PJ5|Q22PJ5_TETTS	tr|Q22PJ5|Q22PJ5_TETTS Transmembrane protein, putative OS=Tetrahymena thermophila (strain SB210) OX=312017 GN=TTHERM_00361490 PE=4 SV=2	1	5	5	5	15.7	57.735	326010	107840	64743	12075	3994.1	2397.9
tr|Q22PK7|Q22PK7_TETTS;tr|Q22PK5|Q22PK5_TETTS	tr|Q22PK7|Q22PK7_TETTS Amidase OS=Tetrahymena thermophila (strain SB210) OX=312017 GN=TTHERM_00361370 PE=3 SV=2;tr|Q22PK5|Q22PK5_TETTS Amidase OS=Tetrahymena thermophila (strain SB210) OX=312017 GN=TTHERM_00361390 PE=3 SV=1	2	1	1	1	2.6	69.046	11740	2453.5	0	326.1	68.152	0
tr|Q22RD5|Q22RD5_TETTS	tr|Q22RD5|Q22RD5_TETTS Uncharacterized protein OS=Tetrahymena thermophila (strain SB210) OX=312017 GN=TTHERM_00016530 PE=4 SV=2	1	1	1	1	3.5	33.51	320340	59787	240550	24642	4599	18504
tr|Q22RI1|Q22RI1_TETTS	tr|Q22RI1|Q22RI1_TETTS Short chain dehydrogenase reductase family protein, putative OS=Tetrahymena thermophila (strain SB210) OX=312017 GN=TTHERM_00016060 PE=4 SV=1	1	1	1	1	4.6	27.473	23230	0	0	1786.9	0	0
tr|Q22RI9|Q22RI9_TETTS	tr|Q22RI9|Q22RI9_TETTS CTP:phosphoethanolamine cytidylyltransferase OS=Tetrahymena thermophila (strain SB210) OX=312017 GN=TTHERM_00015980 PE=3 SV=1	1	3	2	2	8.4	52.027	87995	71707	16288	3666.5	2987.8	678.65
tr|Q22SD5|Q22SD5_TETTS	tr|Q22SD5|Q22SD5_TETTS Kinase domain protein OS=Tetrahymena thermophila (strain SB210) OX=312017 GN=TTHERM_00006010 PE=4 SV=2	1	2	2	2	3.2	87.87	65734	8018.7	15501	2120.4	258.67	500.03
tr|Q22ST6|Q22ST6_TETTS	tr|Q22ST6|Q22ST6_TETTS Structural maintenance of chromosomes protein OS=Tetrahymena thermophila (strain SB210) OX=312017 GN=TTHERM_00812950 PE=3 SV=2	1	8	8	8	8.8	141.05	497200	91235	78930	7311.7	1341.7	1160.7
tr|Q22TE0|Q22TE0_TETTS	tr|Q22TE0|Q22TE0_TETTS Heat shock-binding protein 70, ER luminal protein OS=Tetrahymena thermophila (strain SB210) OX=312017 GN=TTHERM_00171850 PE=3 SV=2	1	4	4	4	5.8	78.207	1129900	455540	286790	35311	14236	8962.2
tr|Q22TF3|Q22TF3_TETTS	tr|Q22TF3|Q22TF3_TETTS Transmembrane protein, putative OS=Tetrahymena thermophila (strain SB210) OX=312017 GN=TTHERM_00171720 PE=4 SV=2	1	2	2	2	5.6	85.072	59787	0	53241	2299.5	0	2047.7
tr|Q22TJ1|Q22TJ1_TETTS	tr|Q22TJ1|Q22TJ1_TETTS 6-phosphofructokinase OS=Tetrahymena thermophila (strain SB210) OX=312017 GN=TTHERM_00170320 PE=4 SV=1	1	6	6	6	13.4	60.377	517220	164370	97004	16163	5136.5	3031.4
tr|Q22U15|Q22U15_TETTS;tr|Q22U20|Q22U20_TETTS;tr|Q22U14|Q22U14_TETTS	tr|Q22U15|Q22U15_TETTS Uncharacterized protein OS=Tetrahymena thermophila (strain SB210) OX=312017 GN=TTHERM_00263680 PE=4 SV=3;tr|Q22U20|Q22U20_TETTS Helicase carboxy-terminal domain protein OS=Tetrahymena thermophila (strain SB210) OX=312017 GN=TTHERM_00	3	1	1	1	0.8	181.83	9497.8	0	0	121.77	0	0
tr|Q22U52|Q22U52_TETTS	tr|Q22U52|Q22U52_TETTS Transmembrane protein, putative OS=Tetrahymena thermophila (strain SB210) OX=312017 GN=TTHERM_00263310 PE=4 SV=3	1	1	1	1	4.7	34.228	6706.9	6706.9	0	558.91	558.91	0
tr|Q22UG4|Q22UG4_TETTS	tr|Q22UG4|Q22UG4_TETTS Ubiquitin-like modifier-activating enzyme OS=Tetrahymena thermophila (strain SB210) OX=312017 GN=TTHERM_00554610 PE=4 SV=1	1	1	1	1	2.3	43.078	60294	27116	15142	4306.7	1936.9	1081.6
tr|Q22UL2|Q22UL2_TETTS;tr|Q9BK15|Q9BK15_TETTH	tr|Q22UL2|Q22UL2_TETTS Glyceraldehyde-3-phosphate dehydrogenase OS=Tetrahymena thermophila (strain SB210) OX=312017 GN=TTHERM_00551160 PE=3 SV=1;tr|Q9BK15|Q9BK15_TETTH Glyceraldehyde-3-phosphate dehydrogenase (Fragment) OS=Tetrahymena thermophila OX=5911 G	2	12	12	12	38.3	36.911	5940000	1721300	2472100	258260	74839	107480
tr|Q22UL9|Q22UL9_TETTS;tr|Q22P63|Q22P63_TETTS	tr|Q22UL9|Q22UL9_TETTS 26S proteasome ATPase regulatory subunit 6 OS=Tetrahymena thermophila (strain SB210) OX=312017 GN=TTHERM_00551090 PE=3 SV=2	2	8	8	7	28.4	44.157	946760	300120	252050	36414	11543	9694.1
tr|Q22UP3|Q22UP3_TETTS	tr|Q22UP3|Q22UP3_TETTS Uncharacterized protein OS=Tetrahymena thermophila (strain SB210) OX=312017 GN=TTHERM_00550810 PE=1 SV=1	1	3	3	3	3.7	120.75	90350	32971	11045	1673.1	610.57	204.53
tr|Q22UW7|Q22UW7_TETTS	tr|Q22UW7|Q22UW7_TETTS PA26 p53-induced protein (Sestrin) protein OS=Tetrahymena thermophila (strain SB210) OX=312017 GN=TTHERM_00577360 PE=3 SV=2	1	1	1	1	4.3	78.203	7626700	0	3264600	231110	0	98928
tr|Q22UX9|Q22UX9_TETTS	tr|Q22UX9|Q22UX9_TETTS 50S ribosomal protein L1P OS=Tetrahymena thermophila (strain SB210) OX=312017 GN=TTHERM_00577240 PE=3 SV=2	1	2	2	2	11.2	24.45	1248800	204670	344040	104060	17056	28670
tr|Q22W07|Q22W07_TETTS;tr|Q22W06|Q22W06_TETTS	tr|Q22W07|Q22W07_TETTS V-type proton ATPase subunit H OS=Tetrahymena thermophila (strain SB210) OX=312017 GN=TTHERM_00161250 PE=3 SV=2	2	3	3	3	6.7	52.903	158520	27191	52680	5466.2	937.62	1816.6
tr|Q22W27|Q22W27_TETTS	tr|Q22W27|Q22W27_TETTS Pre-mRNA-processing factor 19 OS=Tetrahymena thermophila (strain SB210) OX=312017 GN=TTHERM_00161050 PE=3 SV=2	1	3	3	3	8.7	56.303	112100	34889	32450	5605	1744.4	1622.5
tr|Q22W82|Q22W82_TETTS;tr|Q9Y0T0|Q9Y0T0_TETTH;tr|Q9Y0T1|Q9Y0T1_TETTH	tr|Q22W82|Q22W82_TETTS HATPase_c domain-containing protein OS=Tetrahymena thermophila (strain SB210) OX=312017 GN=TTHERM_00158520 PE=3 SV=1;tr|Q9Y0T0|Q9Y0T0_TETTH Hsp82 heat shock protein (Fragment) OS=Tetrahymena thermophila OX=5911 GN=HSP82 PE=2 SV=1	3	29	29	29	42.4	81.762	17484000	5757100	4392000	485680	159920	122000
tr|Q22WG5|Q22WG5_TETTS	tr|Q22WG5|Q22WG5_TETTS SPFH domain/band 7 family protein OS=Tetrahymena thermophila (strain SB210) OX=312017 GN=TTHERM_00156700 PE=4 SV=2	1	3	3	3	11.1	35.026	96282	13208	28704	5663.6	776.96	1688.5
tr|Q22XS5|Q22XS5_TETTS	tr|Q22XS5|Q22XS5_TETTS V-type proton ATPase subunit a OS=Tetrahymena thermophila (strain SB210) OX=312017 GN=TTHERM_01005210 PE=3 SV=2	1	9	9	8	12	106.01	739460	233720	177400	19460	6150.6	4668.4
tr|Q22XU5|Q22XU5_TETTS	tr|Q22XU5|Q22XU5_TETTS Gamma-carbonic anhydrase OS=Tetrahymena thermophila (strain SB210) OX=312017 GN=TTHERM_01005010 PE=4 SV=2	1	1	1	1	4.3	28.187	9472.2	0	0	861.11	0	0
tr|Q22XV3|Q22XV3_TETTS	tr|Q22XV3|Q22XV3_TETTS Metallopeptidase family M24 containing protein OS=Tetrahymena thermophila (strain SB210) OX=312017 GN=TTHERM_01004930 PE=3 SV=1	1	3	3	3	10.5	41.024	151460	74616	62406	6585.4	3244.2	2713.3
tr|Q22Y16|Q22Y16_TETTS	tr|Q22Y16|Q22Y16_TETTS Mitogen-activated protein kinase OS=Tetrahymena thermophila (strain SB210) OX=312017 GN=TTHERM_00355550 PE=3 SV=2	1	1	1	1	1.4	82.585	21893	0	6491.3	729.78	0	216.38
tr|Q22Y55|Q22Y55_TETTS	tr|Q22Y55|Q22Y55_TETTS Serine/threonine-protein phosphatase 2A 65 kDa regulatory subunit A beta OS=Tetrahymena thermophila (strain SB210) OX=312017 GN=TTHERM_00355160 PE=4 SV=2	1	5	5	5	11.2	65.675	172560	55500	39186	4930.2	1585.7	1119.6
tr|Q22YH6|Q22YH6_TETTS	tr|Q22YH6|Q22YH6_TETTS Uncharacterized protein OS=Tetrahymena thermophila (strain SB210) OX=312017 GN=TTHERM_00607150 PE=4 SV=2	1	1	1	1	15	17.484	2562600	668350	766240	197120	51411	58942
tr|Q22YJ5|Q22YJ5_TETTS;tr|Q9U697|Q9U697_TETTH;tr|Q94827|Q94827_TETTH	tr|Q22YJ5|Q22YJ5_TETTS Cell surface immobilization antigen OS=Tetrahymena thermophila (strain SB210) OX=312017 GN=TTHERM_00606960 PE=4 SV=2;tr|Q9U697|Q9U697_TETTH SerH3 immobilization antigen OS=Tetrahymena thermophila OX=5911 GN=SerH3 PE=4 SV=1;tr|Q94827|	3	2	2	2	12.7	33.124	74917	39859	0	14983	7971.9	0
tr|Q22YU1|Q22YU1_TETTS	tr|Q22YU1|Q22YU1_TETTS CCT-alpha OS=Tetrahymena thermophila (strain SB210) OX=312017 GN=TTHERM_00122290 PE=3 SV=3	1	12	12	12	24.3	66.342	2067800	868070	545500	64618	27127	17047
tr|Q22Z05|Q22Z05_TETTS	tr|Q22Z05|Q22Z05_TETTS ATP synthase subunit gamma OS=Tetrahymena thermophila (strain SB210) OX=312017 GN=TTHERM_00118610 PE=1 SV=1	1	2	2	2	6.7	32.873	276110	89534	48198	15339	4974.1	2677.7
tr|Q22Z08|Q22Z08_TETTS	tr|Q22Z08|Q22Z08_TETTS Eukaryotic porin protein OS=Tetrahymena thermophila (strain SB210) OX=312017 GN=TTHERM_00117590 PE=4 SV=2	1	10	10	10	39.5	34.544	4767300	1376700	1320000	250910	72460	69472
tr|Q22ZA6|Q22ZA6_TETTS	tr|Q22ZA6|Q22ZA6_TETTS Carrier protein OS=Tetrahymena thermophila (strain SB210) OX=312017 GN=TTHERM_00112650 PE=3 SV=1	1	1	1	1	5.5	37.061	42731	18975	9493.7	2670.7	1185.9	593.36
tr|Q22ZB6|Q22ZB6_TETTS	tr|Q22ZB6|Q22ZB6_TETTS Pyridine-binding domain transketolase OS=Tetrahymena thermophila (strain SB210) OX=312017 GN=TTHERM_00112550 PE=4 SV=2	1	7	7	7	14.5	71.603	636080	391160	106630	18174	11176	3046.5
tr|Q22ZG2|Q22ZG2_TETTS	tr|Q22ZG2|Q22ZG2_TETTS Dolichyl-diphosphooligosaccharide--protein glycosyltransferase subunit 2 OS=Tetrahymena thermophila (strain SB210) OX=312017 GN=TTHERM_01097950 PE=3 SV=2	1	2	2	2	3.4	77.225	79266	19690	4929.7	2402	596.66	149.38
tr|Q22ZH1|Q22ZH1_TETTS	tr|Q22ZH1|Q22ZH1_TETTS Uncharacterized protein OS=Tetrahymena thermophila (strain SB210) OX=312017 GN=TTHERM_01094890 PE=1 SV=2	1	1	1	1	7	17.867	51679	15628	15735	8613.2	2604.7	2622.4
tr|Q230V9|Q230V9_TETTS	tr|Q230V9|Q230V9_TETTS Transmembrane protein, putative OS=Tetrahymena thermophila (strain SB210) OX=312017 GN=TTHERM_00434000 PE=4 SV=2	1	12	12	12	36.3	55.619	3975400	1047000	1088100	209230	55104	57269
tr|Q230X6|Q230X6_TETTS	tr|Q230X6|Q230X6_TETTS Uncharacterized protein OS=Tetrahymena thermophila (strain SB210) OX=312017 GN=TTHERM_00433830 PE=4 SV=2	1	2	2	2	12.4	19.857	43907	28640	0	4390.7	2864	0
tr|Q231B0|Q231B0_TETTS	tr|Q231B0|Q231B0_TETTS Vacuolar ATP synthase OS=Tetrahymena thermophila (strain SB210) OX=312017 GN=TTHERM_00433470 PE=3 SV=2	1	8	8	8	27.6	44.46	1080800	297420	263380	56886	15654	13862
tr|Q231G9|Q231G9_TETTS	tr|Q231G9|Q231G9_TETTS CTP:phosphoethanolamine cytidylyltransferase OS=Tetrahymena thermophila (strain SB210) OX=312017 GN=TTHERM_00429910 PE=3 SV=1	1	5	5	4	13.7	53.662	479180	164330	118700	17113	5869.1	4239.2
tr|Q231W2|Q231W2_TETTS	tr|Q231W2|Q231W2_TETTS H(+)-exporting diphosphatase OS=Tetrahymena thermophila (strain SB210) OX=312017 GN=TTHERM_00735340 PE=3 SV=1	1	4	2	2	6.6	81.431	152640	33202	46498	6636.7	1443.6	2021.7
tr|Q231X2|Q231X2_TETTS;tr|Q24C75|Q24C75_TETTS;tr|Q24C74|Q24C74_TETTS;tr|Q24C73|Q24C73_TETTS;tr|Q24C72|Q24C72_TETTS;tr|Q24C71|Q24C71_TETTS	tr|Q231X2|Q231X2_TETTS ADP-ribosylation factor(Arf)/Arf-like (Arl) small GTPase family protein OS=Tetrahymena thermophila (strain SB210) OX=312017 GN=TTHERM_00735240 PE=3 SV=1	6	7	7	7	47.2	20.449	3521800	952250	983220	352180	95225	98322
tr|Q233H7|Q233H7_TETTS	tr|Q233H7|Q233H7_TETTS SPFH domain/band 7 family protein OS=Tetrahymena thermophila (strain SB210) OX=312017 GN=TTHERM_00392720 PE=4 SV=1	1	2	2	2	5.3	42.976	67287	12298	15939	3204.2	585.6	759.02
tr|Q233M0|Q233M0_TETTS	tr|Q233M0|Q233M0_TETTS Chaperone protein DnaJ OS=Tetrahymena thermophila (strain SB210) OX=312017 GN=TTHERM_00391300 PE=4 SV=3	1	6	6	6	19.2	48.595	764300	137720	224480	33230	5987.6	9760
tr|Q234B0|Q234B0_TETTS	tr|Q234B0|Q234B0_TETTS Diadenosine tetraphosphate synthetase OS=Tetrahymena thermophila (strain SB210) OX=312017 GN=TTHERM_00106940 PE=3 SV=1	1	7	7	7	14.6	72.206	568120	141160	133130	16710	4151.8	3915.6
tr|Q234F3|Q234F3_TETTS	tr|Q234F3|Q234F3_TETTS Dihydrolipoyllysine-residue succinyltransferase OS=Tetrahymena thermophila (strain SB210) OX=312017 GN=TTHERM_00105450 PE=3 SV=3	1	6	6	6	17.8	47.429	1046800	269560	208270	49847	12836	9917.5
tr|Q234G8|Q234G8_TETTS	tr|Q234G8|Q234G8_TETTS WD40 domain protein OS=Tetrahymena thermophila (strain SB210) OX=312017 GN=TTHERM_00105300 PE=4 SV=2	1	1	1	1	1.4	152.46	6497200	2287700	1438000	103130	36313	22825
tr|Q234I5|Q234I5_TETTS;tr|Q6T259|Q6T259_TETTH;tr|I7MJ63|I7MJ63_TETTS;tr|I1VWH0|I1VWH0_TETTH;tr|Q22C26|Q22C26_TETTS;tr|Q22CG9|Q22CG9_TETTS;tr|I7MLI5|I7MLI5_TETTS;tr|Q8T5G3|Q8T5G3_TETTH	tr|Q234I5|Q234I5_TETTS Heat shock 70 kDa protein OS=Tetrahymena thermophila (strain SB210) OX=312017 GN=TTHERM_00105110 PE=3 SV=1	8	17	17	17	28.2	71.44	4374900	1562900	1249800	136710	48840	39057
tr|Q234R6|Q234R6_TETTS	tr|Q234R6|Q234R6_TETTS DnaJ carboxy-terminal domain protein OS=Tetrahymena thermophila (strain SB210) OX=312017 GN=TTHERM_00101330 PE=3 SV=1	1	1	1	1	3.3	42.186	11004	11004	0	579.14	579.14	0
tr|Q234Z5|Q234Z5_TETTS	tr|Q234Z5|Q234Z5_TETTS tRNA pseudouridine synthase OS=Tetrahymena thermophila (strain SB210) OX=312017 GN=TTHERM_00095540 PE=3 SV=1	1	2	2	2	5.9	48.052	26389	0	883.44	1055.6	0	35.337
tr|Q235C4|Q235C4_TETTS;tr|Q24HN0|Q24HN0_TETTS	tr|Q235C4|Q235C4_TETTS Serine/threonine-protein phosphatase OS=Tetrahymena thermophila (strain SB210) OX=312017 GN=TTHERM_00804750 PE=3 SV=2;tr|Q24HN0|Q24HN0_TETTS Serine/threonine-protein phosphatase OS=Tetrahymena thermophila (strain SB210) OX=312017 GN=	2	2	2	2	4.3	58.765	63553	35816	6267.2	2444.3	1377.5	241.05
tr|Q235W9|Q235W9_TETTS	tr|Q235W9|Q235W9_TETTS Phospholipid scramblase OS=Tetrahymena thermophila (strain SB210) OX=312017 GN=TTHERM_00094220 PE=3 SV=2	1	1	1	1	4.2	27.382	29006	7865.1	6641.6	2636.9	715	603.79
tr|Q2I2L4|Q2I2L4_TETTH;tr|Q236L9|Q236L9_TETTS	tr|Q2I2L4|Q2I2L4_TETTH C-terminal crystallin fold containing protein 12p OS=Tetrahymena thermophila OX=5911 GN=CCF12 PE=2 SV=1;tr|Q236L9|Q236L9_TETTS Carboxy-terminal crystallin fold protein 12p OS=Tetrahymena thermophila (strain SB210) OX=312017 GN=TTHERM	2	19	19	19	42.2	69.583	10313000	3385100	4292500	381960	125370	158980
tr|Q236M7|Q236M7_TETTS	tr|Q236M7|Q236M7_TETTS MORN motif protein OS=Tetrahymena thermophila (strain SB210) OX=312017 GN=TTHERM_00086700 PE=4 SV=2	1	1	1	1	1.4	87.423	41641	16702	0	1015.6	407.35	0
tr|Q9XXV2|Q9XXV2_TETTH;tr|Q236S6|Q236S6_TETTS	tr|Q9XXV2|Q9XXV2_TETTH Mitogen-activated protein kinase OS=Tetrahymena thermophila OX=5911 PE=2 SV=2;tr|Q236S6|Q236S6_TETTS Mitogen-activated protein kinase OS=Tetrahymena thermophila (strain SB210) OX=312017 GN=TTHERM_00085220 PE=3 SV=2	2	1	1	1	3.7	48.969	24004	0	8623.6	1000.2	0	359.32
tr|Q236X2|Q236X2_TETTS	tr|Q236X2|Q236X2_TETTS FHA domain protein OS=Tetrahymena thermophila (strain SB210) OX=312017 GN=TTHERM_00083770 PE=4 SV=1	1	1	1	1	1.6	63.89	65279	0	8975	2331.4	0	320.54
tr|Q239F3|Q239F3_TETTS	tr|Q239F3|Q239F3_TETTS Tetratricopeptide repeat protein OS=Tetrahymena thermophila (strain SB210) OX=312017 GN=TTHERM_00448610 PE=4 SV=2	1	1	1	1	0.8	160.94	673080	141640	2776.2	10355	2179.1	42.711
tr|Q239R1|Q239R1_TETTS	tr|Q239R1|Q239R1_TETTS ATP synthase subunit d, mitochondrial OS=Tetrahymena thermophila (strain SB210) OX=312017 GN=TTHERM_01188360 PE=1 SV=2	1	3	3	3	18.4	26.718	231750	51872	57056	19312	4322.7	4754.7
tr|Q23A57|Q23A57_TETTS;tr|Q23A65|Q23A65_TETTS;tr|Q23A56|Q23A56_TETTS	tr|Q23A57|Q23A57_TETTS Zinc carboxypeptidase family protein OS=Tetrahymena thermophila (strain SB210) OX=312017 GN=TTHERM_00833610 PE=4 SV=2;tr|Q23A65|Q23A65_TETTS Uncharacterized protein OS=Tetrahymena thermophila (strain SB210) OX=312017 GN=TTHERM_008315	3	1	1	1	2.1	61.071	210230	58796	78094	6781.7	1896.6	2519.2
tr|Q23AD5|Q23AD5_TETTS	tr|Q23AD5|Q23AD5_TETTS Uncharacterized protein OS=Tetrahymena thermophila (strain SB210) OX=312017 GN=TTHERM_00426240 PE=4 SV=2	1	1	1	1	10.1	16.367	28777	2891.2	6325.2	3197.5	321.24	702.8
tr|Q23AP5|Q23AP5_TETTS	tr|Q23AP5|Q23AP5_TETTS Dolichyl-diphosphooligosaccharide--protein glycosyltransferase 48 kDa subunit OS=Tetrahymena thermophila (strain SB210) OX=312017 GN=TTHERM_00772030 PE=3 SV=1	1	1	1	1	3.7	50.005	16540	6705.3	0	787.63	319.3	0
tr|Q23B15|Q23B15_TETTS	tr|Q23B15|Q23B15_TETTS V-type proton ATPase proteolipid subunit OS=Tetrahymena thermophila (strain SB210) OX=312017 GN=TTHERM_00653620 PE=3 SV=1	1	1	1	1	11.8	15.524	304730	69665	75319	76181	17416	18830
tr|Q23C01|Q23C01_TETTS	tr|Q23C01|Q23C01_TETTS Tetratricopeptide repeat protein OS=Tetrahymena thermophila (strain SB210) OX=312017 GN=TTHERM_00225810 PE=4 SV=2	1	1	1	1	1.1	120.9	379450	0	173000	6120.1	0	2790.4
tr|Q23CK5|Q23CK5_TETTS	tr|Q23CK5|Q23CK5_TETTS Cullin family protein OS=Tetrahymena thermophila (strain SB210) OX=312017 GN=TTHERM_00856520 PE=3 SV=2	1	5	5	5	8.2	96.676	341300	125220	39176	6692.1	2455.3	768.15
tr|Q23CU3|Q23CU3_TETTS	tr|Q23CU3|Q23CU3_TETTS AMP-dependent synthetase/ligase OS=Tetrahymena thermophila (strain SB210) OX=312017 GN=TTHERM_00052470 PE=3 SV=1	1	4	4	4	8.8	75.528	188460	76225	19035	4711.5	1905.6	475.87
tr|Q23CV9|Q23CV9_TETTS;tr|Q86M81|Q86M81_TETTH	tr|Q23CV9|Q23CV9_TETTS ADP/ATP translocase OS=Tetrahymena thermophila (strain SB210) OX=312017 GN=TTHERM_00052310 PE=3 SV=1	2	8	8	8	29.1	34.025	2333600	728900	561350	122820	38363	29545
tr|Q23D05|Q23D05_TETTS	tr|Q23D05|Q23D05_TETTS Uncharacterized protein OS=Tetrahymena thermophila (strain SB210) OX=312017 GN=TTHERM_00051840 PE=4 SV=2	1	2	2	2	4.9	47.727	96646	21476	27862	3451.7	767.02	995.07
tr|Q23D46|Q23D46_TETTS	tr|Q23D46|Q23D46_TETTS 26S proteasome regulatory subunit RPN11 OS=Tetrahymena thermophila (strain SB210) OX=312017 GN=TTHERM_00049450 PE=4 SV=1	1	2	2	2	8.6	35.108	311840	105180	94344	25987	8764.9	7862
tr|Q76CB1|Q76CB1_TETTH;tr|Q23D84|Q23D84_TETTS	tr|Q76CB1|Q76CB1_TETTH Citrate synthase OS=Tetrahymena thermophila OX=5911 GN=tgCS PE=2 SV=1;tr|Q23D84|Q23D84_TETTS Citrate synthase OS=Tetrahymena thermophila (strain SB210) OX=312017 GN=TTHERM_00049070 PE=3 SV=1	2	3	3	3	7.5	54.938	178850	26206	32751	5961.6	873.52	1091.7
tr|Q23D88|Q23D88_TETTS	tr|Q23D88|Q23D88_TETTS Na,H/K antiporter P-type ATPase alpha subunit family protein OS=Tetrahymena thermophila (strain SB210) OX=312017 GN=TTHERM_00049030 PE=3 SV=2	1	2	2	2	2.6	135.68	88264	16104	15492	1730.7	315.76	303.77
tr|Q23DI3|Q23DI3_TETTS	tr|Q23DI3|Q23DI3_TETTS Succinate dehydrogenase [ubiquinone] flavoprotein subunit, mitochondrial OS=Tetrahymena thermophila (strain SB210) OX=312017 GN=TTHERM_00047080 PE=3 SV=2	1	3	3	3	5.8	69.979	198160	53948	56342	5828.1	1586.7	1657.1
tr|Q23DJ9|Q23DJ9_TETTS	tr|Q23DJ9|Q23DJ9_TETTS RuvB-like helicase OS=Tetrahymena thermophila (strain SB210) OX=312017 GN=TTHERM_00046920 PE=3 SV=1	1	14	14	14	37	51.657	2977800	754320	1031800	99262	25144	34394
tr|Q23DP3|Q23DP3_TETTS	tr|Q23DP3|Q23DP3_TETTS Phosphopyruvate hydratase OS=Tetrahymena thermophila (strain SB210) OX=312017 GN=TTHERM_00046480 PE=3 SV=1	1	5	5	5	16.8	50.132	590810	126690	275900	25687	5508.4	11995
tr|Q23DP7|Q23DP7_TETTS	tr|Q23DP7|Q23DP7_TETTS TraB family protein OS=Tetrahymena thermophila (strain SB210) OX=312017 GN=TTHERM_00046440 PE=4 SV=2	1	1	1	1	2.9	44.958	37852	20859	16992	1577.1	869.14	708.01
tr|Q23DR0|Q23DR0_TETTS;tr|Q9BIX3|Q9BIX3_TETTH;tr|O15764|O15764_TETTH	tr|Q23DR0|Q23DR0_TETTS Dynein heavy chain, cytoplasmic protein OS=Tetrahymena thermophila (strain SB210) OX=312017 GN=TTHERM_00046310 PE=4 SV=2;tr|Q9BIX3|Q9BIX3_TETTH Cytoplasmic dynein 1 (Fragment) OS=Tetrahymena thermophila OX=5911 GN=DYH1 PE=4 SV=1	3	12	12	12	3.3	526.91	242870	26940	19545	971.48	107.76	78.181
tr|Q23DV4|Q23DV4_TETTS	tr|Q23DV4|Q23DV4_TETTS Dolichyl-diphosphooligosaccharide--protein glycosyltransferase subunit 1 OS=Tetrahymena thermophila (strain SB210) OX=312017 GN=TTHERM_00043890 PE=3 SV=1	1	1	1	1	2.8	53.601	46737	10361	0	2032	450.46	0
tr|Q23DV6|Q23DV6_TETTS	tr|Q23DV6|Q23DV6_TETTS Dihydrolipoyl dehydrogenase OS=Tetrahymena thermophila (strain SB210) OX=312017 GN=TTHERM_00043870 PE=3 SV=2	1	5	5	5	17.4	52.448	457840	58634	172760	16352	2094.1	6170
tr|Q23DZ5|Q23DZ5_TETTS	tr|Q23DZ5|Q23DZ5_TETTS Uncharacterized protein OS=Tetrahymena thermophila (strain SB210) OX=312017 GN=TTHERM_00675650 PE=4 SV=2	1	1	1	1	6.3	37.516	54554	28083	5621.1	4959.5	2553	511.01
tr|Q23EE3|Q23EE3_TETTS	tr|Q23EE3|Q23EE3_TETTS Malate dehydrogenase OS=Tetrahymena thermophila (strain SB210) OX=312017 GN=TTHERM_01029960 PE=3 SV=2	1	2	2	2	4.1	62.335	121890	78443	32598	5540.2	3565.6	1481.7
tr|Q23F09|Q23F09_TETTS	tr|Q23F09|Q23F09_TETTS Phosphoglycerate mutase OS=Tetrahymena thermophila (strain SB210) OX=312017 GN=TTHERM_00641240 PE=3 SV=3	1	2	2	2	8	31.639	243540	45020	106380	14326	2648.2	6257.8
tr|Q23F76|Q23F76_TETTS	tr|Q23F76|Q23F76_TETTS AMP-binding enzyme family protein OS=Tetrahymena thermophila (strain SB210) OX=312017 GN=TTHERM_00382380 PE=4 SV=1	1	7	7	6	12.3	74.685	311800	99267	111570	8205.4	2612.3	2936
tr|Q23F81|Q23F81_TETTS	tr|Q23F81|Q23F81_TETTS Uncharacterized protein OS=Tetrahymena thermophila (strain SB210) OX=312017 GN=TTHERM_00382330 PE=4 SV=2	1	9	9	9	32.9	39.137	1106500	360590	288790	52690	17171	13752
tr|Q23FB7|Q23FB7_TETTS;tr|Q8MUT3|Q8MUT3_TETTH	tr|Q23FB7|Q23FB7_TETTS Uncharacterized protein OS=Tetrahymena thermophila (strain SB210) OX=312017 GN=TTHERM_00379000 PE=4 SV=2	2	9	9	9	14.5	132.94	534680	81977	255480	7749	1188.1	3702.7
tr|Q23FC0|Q23FC0_TETTS	tr|Q23FC0|Q23FC0_TETTS 26S proteasome non-ATPase regulatory subunit OS=Tetrahymena thermophila (strain SB210) OX=312017 GN=TTHERM_00378970 PE=3 SV=3	1	8	8	8	21.3	48.591	1076800	315320	323190	39881	11678	11970
tr|Q23FF5|Q23FF5_TETTS	tr|Q23FF5|Q23FF5_TETTS Cytochrome C oxidase subunit Vb protein OS=Tetrahymena thermophila (strain SB210) OX=312017 GN=TTHERM_00378620 PE=3 SV=3	1	4	4	4	8.3	75.163	327280	116370	50125	13637	4848.6	2088.5
tr|Q23FG1|Q23FG1_TETTS	tr|Q23FG1|Q23FG1_TETTS Eukaryotic translation initiation factor 3 subunit 8 OS=Tetrahymena thermophila (strain SB210) OX=312017 GN=TTHERM_00378560 PE=4 SV=2	1	1	1	1	1.5	111.43	5777.7	0	0	106.99	0	0
tr|Q23FI7|Q23FI7_TETTS	tr|Q23FI7|Q23FI7_TETTS Calcium/calmodulin-dependent kinase OS=Tetrahymena thermophila (strain SB210) OX=312017 GN=TTHERM_00377310 PE=3 SV=2	1	2	2	2	6.7	35.436	69318	14835	26063	4077.5	872.65	1533.1
tr|Q23FR1|Q23FR1_TETTS	tr|Q23FR1|Q23FR1_TETTS Succinate--CoA ligase [ADP-forming] subunit beta, mitochondrial OS=Tetrahymena thermophila (strain SB210) OX=312017 GN=TTHERM_00079540 PE=3 SV=2	1	5	5	5	15	49.112	352380	151470	88500	14095	6058.9	3540
tr|Q23FV2|Q23FV2_TETTS	tr|Q23FV2|Q23FV2_TETTS Uncharacterized protein OS=Tetrahymena thermophila (strain SB210) OX=312017 GN=TTHERM_00079120 PE=4 SV=1	1	1	1	1	1.8	92.356	54112	7324.7	0	1288.4	174.4	0
tr|Q23FX2|Q23FX2_TETTS	tr|Q23FX2|Q23FX2_TETTS Sodium hydrogen exchanger family protein, putative OS=Tetrahymena thermophila (strain SB210) OX=312017 GN=TTHERM_00078920 PE=3 SV=3	1	3	3	3	3.4	112.95	194080	39815	38624	5107.5	1047.8	1016.4
tr|Q23G41|Q23G41_TETTS	tr|Q23G41|Q23G41_TETTS DNA-directed RNA polymerase subunit beta OS=Tetrahymena thermophila (strain SB210) OX=312017 GN=TTHERM_00077230 PE=3 SV=1	1	2	2	2	2.4	140.29	37281	15291	3813.5	556.44	228.22	56.918
tr|Q23JD9|Q23JD9_TETTS	tr|Q23JD9|Q23JD9_TETTS Coatomer subunit beta OS=Tetrahymena thermophila (strain SB210) OX=312017 GN=TTHERM_00488350 PE=4 SV=3	1	7	7	7	9	110.78	261990	45448	46664	5458.1	946.83	972.17
tr|Q23JK7|Q23JK7_TETTS	tr|Q23JK7|Q23JK7_TETTS Dopey, amine-terminal domain protein OS=Tetrahymena thermophila (strain SB210) OX=312017 GN=TTHERM_00758980 PE=3 SV=1	1	1	1	1	0.7	256.93	15317	0	0	125.55	0	0
tr|Q23JM1|Q23JM1_TETTS	tr|Q23JM1|Q23JM1_TETTS Dual-specificity kinase domain protein OS=Tetrahymena thermophila (strain SB210) OX=312017 GN=TTHERM_00758840 PE=4 SV=1	1	2	2	2	3.3	71.1	84936	2282.6	7770.2	2123.4	57.065	194.26
tr|Q23JZ7|Q23JZ7_TETTS;tr|Q95YG7|Q95YG7_TETTH	tr|Q23JZ7|Q23JZ7_TETTS Chaperonin CPN60-1 OS=Tetrahymena thermophila (strain SB210) OX=312017 GN=TTHERM_00196370 PE=3 SV=2	2	10	10	10	22.8	61.624	826050	299970	215830	22946	8332.6	5995.1
tr|Q23K04|Q23K04_TETTS;tr|Q23K03|Q23K03_TETTS	tr|Q23K04|Q23K04_TETTS Uncharacterized protein OS=Tetrahymena thermophila (strain SB210) OX=312017 GN=TTHERM_00196300 PE=4 SV=1;tr|Q23K03|Q23K03_TETTS Uncharacterized protein OS=Tetrahymena thermophila (strain SB210) OX=312017 GN=TTHERM_00196310 PE=4 SV=1	2	2	2	2	15.2	19.438	78308	13958	27012	7118.9	1268.9	2455.6
tr|Q23K81|Q23K81_TETTS	tr|Q23K81|Q23K81_TETTS TATA-binding protein interacting (TIP20) protein OS=Tetrahymena thermophila (strain SB210) OX=312017 GN=TTHERM_00194540 PE=3 SV=2	1	8	8	7	8.2	143.42	424040	169240	25949	5808.7	2318.4	355.46
tr|Q23K82|Q23K82_TETTS	tr|Q23K82|Q23K82_TETTS Ribosomal protein S18 OS=Tetrahymena thermophila (strain SB210) OX=312017 GN=TTHERM_00194530 PE=1 SV=2	1	3	3	3	6.6	63.785	195010	73867	21923	5270.7	1996.4	592.5
tr|Q23K85|Q23K85_TETTS	tr|Q23K85|Q23K85_TETTS GPN-loop GTPase OS=Tetrahymena thermophila (strain SB210) OX=312017 GN=TTHERM_00194500 PE=3 SV=2	1	1	1	1	3.9	41.344	10622	0	3446	817.07	0	265.08
tr|Q23KA9|Q23KA9_TETTS	tr|Q23KA9|Q23KA9_TETTS NADH-ubiquinone oxidoreductase 75 kDa subunit OS=Tetrahymena thermophila (strain SB210) OX=312017 GN=TTHERM_00194260 PE=3 SV=2	1	5	5	5	8.6	80.478	368030	119290	83366	9436.6	3058.7	2137.6
tr|Q23KE4|Q23KE4_TETTS	tr|Q23KE4|Q23KE4_TETTS NADH dehydrogenase [ubiquinone] flavoprotein 1, mitochondrial OS=Tetrahymena thermophila (strain SB210) OX=312017 GN=TTHERM_00193910 PE=3 SV=1	1	1	1	1	3.4	52.246	49884	24542	15385	1995.4	981.69	615.4
tr|Q23KG9|Q23KG9_TETTS	tr|Q23KG9|Q23KG9_TETTS Vacuolar ATP synthase subunit E OS=Tetrahymena thermophila (strain SB210) OX=312017 GN=TTHERM_00193660 PE=3 SV=1	1	3	3	3	15.7	26.85	449360	103230	113560	37447	8602.2	9463.1
tr|Q23MC5|Q23MC5_TETTS	tr|Q23MC5|Q23MC5_TETTS Rab-GTPase-TBC domain protein OS=Tetrahymena thermophila (strain SB210) OX=312017 GN=TTHERM_00621340 PE=4 SV=2	1	1	1	1	0.5	229.58	86774	86774	0	867.74	867.74	0
tr|Q8MXZ9|Q8MXZ9_TETTH;tr|Q8MQL1|Q8MQL1_TETTH;tr|Q23ND1|Q23ND1_TETTS	tr|Q8MXZ9|Q8MXZ9_TETTH Piwi-related protein OS=Tetrahymena thermophila OX=5911 GN=TWI1 PE=1 SV=1;tr|Q8MQL1|Q8MQL1_TETTH CnjA protein OS=Tetrahymena thermophila OX=5911 GN=cnjA PE=2 SV=2;tr|Q23ND1|Q23ND1_TETTS Piwi domain protein OS=Tetrahymena thermophila	3	7	7	7	14.4	89.525	338180	72345	83551	7515.1	1607.7	1856.7
tr|Q23PQ3|Q23PQ3_TETTS	tr|Q23PQ3|Q23PQ3_TETTS Plasma-membrane choline transporter OS=Tetrahymena thermophila (strain SB210) OX=312017 GN=TTHERM_00463800 PE=3 SV=1	1	3	3	3	6.2	68.116	228920	33577	56001	9156.6	1343.1	2240.1
tr|Q23PT8|Q23PT8_TETTS	tr|Q23PT8|Q23PT8_TETTS Serine hydroxymethyltransferase OS=Tetrahymena thermophila (strain SB210) OX=312017 GN=TTHERM_00463450 PE=3 SV=1	1	1	1	1	2.3	54.46	15762	15762	0	583.79	583.79	0
tr|Q23PU1|Q23PU1_TETTS	tr|Q23PU1|Q23PU1_TETTS V-type proton ATPase subunit a OS=Tetrahymena thermophila (strain SB210) OX=312017 GN=TTHERM_00463420 PE=3 SV=1	1	1	1	1	1.3	99.551	24977	0	0	640.43	0	0
tr|Q23PZ5|Q23PZ5_TETTS	tr|Q23PZ5|Q23PZ5_TETTS Eukaryotic aspartyl protease OS=Tetrahymena thermophila (strain SB210) OX=312017 GN=TTHERM_00462870 PE=4 SV=3	1	10	10	10	27.3	57.209	1741000	384370	674300	69641	15375	26972
tr|Q23Q76|Q23Q76_TETTS	tr|Q23Q76|Q23Q76_TETTS Adaptin amine-terminal region protein OS=Tetrahymena thermophila (strain SB210) OX=312017 GN=TTHERM_00582140 PE=3 SV=2	1	1	1	1	1.4	116.53	16140	2618.1	1904.9	358.66	58.181	42.331
tr|Q23QL3|Q23QL3_TETTS	tr|Q23QL3|Q23QL3_TETTS Transmembrane protein, putative OS=Tetrahymena thermophila (strain SB210) OX=312017 GN=TTHERM_00255660 PE=4 SV=2	1	1	1	1	1.3	107.5	34453	11739	6142.4	883.41	301	157.5
tr|Q23QM4|Q23QM4_TETTS	tr|Q23QM4|Q23QM4_TETTS PH domain protein OS=Tetrahymena thermophila (strain SB210) OX=312017 GN=TTHERM_00254560 PE=3 SV=2	1	2	1	1	0.7	398.7	10958	0	0	57.369	0	0
tr|Q23QZ6|Q23QZ6_TETTS	tr|Q23QZ6|Q23QZ6_TETTS FBA domain-containing protein OS=Tetrahymena thermophila (strain SB210) OX=312017 GN=TTHERM_00997650 PE=4 SV=2	1	8	8	8	23.5	53.642	319990	31063	184570	11851	1150.5	6835.8
tr|Q23R26|Q23R26_TETTS	tr|Q23R26|Q23R26_TETTS ABC transporter family protein OS=Tetrahymena thermophila (strain SB210) OX=312017 GN=TTHERM_00850570 PE=4 SV=2	1	3	3	3	8.2	67.122	123310	45329	26782	3853.4	1416.5	836.93
tr|Q23R52|Q23R52_TETTS	tr|Q23R52|Q23R52_TETTS ADP-ribosylation factor(Arf)/Arf-like (Arl) small GTPase family protein OS=Tetrahymena thermophila (strain SB210) OX=312017 GN=TTHERM_00849320 PE=3 SV=1	1	7	1	1	47.9	21.799	61905	28722	0	5158.8	2393.5	0
tr|Q23RC5|Q23RC5_TETTS	tr|Q23RC5|Q23RC5_TETTS Prohibitin OS=Tetrahymena thermophila (strain SB210) OX=312017 GN=TTHERM_00388640 PE=3 SV=2	1	5	5	5	22.5	31.114	346030	64770	125560	21627	4048.1	7847.4
tr|Q23RE5|Q23RE5_TETTS	tr|Q23RE5|Q23RE5_TETTS 26S proteasome non-ATPase regulatory subunit OS=Tetrahymena thermophila (strain SB210) OX=312017 GN=TTHERM_00388440 PE=4 SV=2	1	12	12	12	37.3	44.623	2222100	673460	820290	101000	30612	37286
tr|Q23RI2|Q23RI2_TETTS	tr|Q23RI2|Q23RI2_TETTS Calcium-transporting ATPase OS=Tetrahymena thermophila (strain SB210) OX=312017 GN=TTHERM_00387080 PE=3 SV=2	1	1	1	1	1.1	120.05	6131.6	1076.8	0	120.23	21.114	0
tr|Q23RT8|Q23RT8_TETTS	tr|Q23RT8|Q23RT8_TETTS Vacuolar ATP synthase subunit E OS=Tetrahymena thermophila (strain SB210) OX=312017 GN=TTHERM_00628600 PE=3 SV=2	1	2	2	2	12.1	30.484	32186	5170.5	18640	2145.7	344.7	1242.6
tr|Q23RV7|Q23RV7_TETTS	tr|Q23RV7|Q23RV7_TETTS WD domain, G-beta repeat protein OS=Tetrahymena thermophila (strain SB210) OX=312017 GN=TTHERM_00628410 PE=4 SV=2	1	1	1	1	0.8	195.19	67231	66637	0	693.1	686.98	0
tr|Q23RZ9|Q23RZ9_TETTS	tr|Q23RZ9|Q23RZ9_TETTS SIT4 phosphatase-associated protein OS=Tetrahymena thermophila (strain SB210) OX=312017 GN=TTHERM_00627000 PE=3 SV=3	1	3	3	3	4.4	85.57	99060	27064	17340	2677.3	731.46	468.64
tr|Q23TB8|Q23TB8_TETTS	tr|Q23TB8|Q23TB8_TETTS 3-hydroxyacyl-CoA dehydrogenase OS=Tetrahymena thermophila (strain SB210) OX=312017 GN=TTHERM_00666640 PE=3 SV=1	1	1	1	1	6.1	32.522	35851	12792	15213	2757.7	983.98	1170.2
tr|Q23TG4|Q23TG4_TETTS	tr|Q23TG4|Q23TG4_TETTS Trk system potassium uptake protein TrkA, amine-terminal domain protein OS=Tetrahymena thermophila (strain SB210) OX=312017 GN=TTHERM_00666180 PE=4 SV=1	1	5	5	5	13.6	65.277	242170	66202	22767	7338.6	2006.1	689.9
tr|Q23TU2|Q23TU2_TETTS	tr|Q23TU2|Q23TU2_TETTS Dynein heavy chain 2, putative OS=Tetrahymena thermophila (strain SB210) OX=312017 GN=TTHERM_00912290 PE=4 SV=2	1	1	1	1	0.2	559.33	7282.2	0	0	27.584	0	0
tr|Q23U16|Q23U16_TETTS	tr|Q23U16|Q23U16_TETTS DEAD/DEAH-box helicase OS=Tetrahymena thermophila (strain SB210) OX=312017 GN=TTHERM_01197120 PE=3 SV=2	1	8	8	8	28.6	45.439	966770	536940	255390	46037	25569	12162
tr|Q23U25|Q23U25_TETTS	tr|Q23U25|Q23U25_TETTS F-box associated region protein OS=Tetrahymena thermophila (strain SB210) OX=312017 GN=TTHERM_01197030 PE=4 SV=2	1	13	13	13	32.8	55.317	3289100	383760	1342500	137050	15990	55936
tr|Q23U98|Q23U98_TETTS	tr|Q23U98|Q23U98_TETTS DNA-directed RNA polymerase OS=Tetrahymena thermophila (strain SB210) OX=312017 GN=TTHERM_00888020 PE=3 SV=2	1	1	1	1	6.4	36.714	27571	6490.7	18348	1621.8	381.81	1079.3
tr|Q23VX7|Q23VX7_TETTS	tr|Q23VX7|Q23VX7_TETTS Dihydrolipoamide acetyltransferase component of pyruvate dehydrogenase complex OS=Tetrahymena thermophila (strain SB210) OX=312017 GN=TTHERM_00794540 PE=3 SV=1	1	4	4	4	10.6	51.583	270090	23560	81943	11254	981.65	3414.3
tr|Q23WM8|Q23WM8_TETTS;sp|Q95050|ATX9_TETTH	tr|Q23WM8|Q23WM8_TETTS Cation-transporting ATPase, putative OS=Tetrahymena thermophila (strain SB210) OX=312017 GN=TTHERM_00923170 PE=3 SV=1;sp|Q95050|ATX9_TETTH Probable cation-transporting ATPase 9 OS=Tetrahymena thermophila OX=5911 GN=TPA9 PE=2 SV=1	2	6	6	6	6.9	128.09	337310	51244	43609	6364.3	966.87	822.8
tr|Q23WS9|Q23WS9_TETTS	tr|Q23WS9|Q23WS9_TETTS Uncharacterized protein OS=Tetrahymena thermophila (strain SB210) OX=312017 GN=TTHERM_00777260 PE=4 SV=2	1	11	11	11	48.6	35.461	4937700	1354900	787060	205740	56454	32794
tr|Q23XH5|Q23XH5_TETTS	tr|Q23XH5|Q23XH5_TETTS Tetratricopeptide repeat protein OS=Tetrahymena thermophila (strain SB210) OX=312017 GN=TTHERM_01414130 PE=4 SV=2	1	1	1	1	2.6	43.806	179720	130940	29914	9984.6	7274.4	1661.9
tr|Q23YB7|Q23YB7_TETTS	tr|Q23YB7|Q23YB7_TETTS Peroxisomal 3-ketoacyl-CoA thiolase B OS=Tetrahymena thermophila (strain SB210) OX=312017 GN=TTHERM_00899460 PE=3 SV=2	1	6	6	6	19	44.109	492870	103860	187820	23470	4945.8	8943.8
tr|Q23YQ0|Q23YQ0_TETTS	tr|Q23YQ0|Q23YQ0_TETTS Uncharacterized protein OS=Tetrahymena thermophila (strain SB210) OX=312017 GN=TTHERM_01207720 PE=1 SV=1	1	4	4	4	7	80.617	130790	19858	37803	3633.1	551.6	1050.1
tr|Q5Y2C4|Q5Y2C4_TETTH;tr|Q23YQ6|Q23YQ6_TETTS	tr|Q5Y2C4|Q5Y2C4_TETTH Cdc2 protein kinase OS=Tetrahymena thermophila OX=5911 GN=CDC2 PE=2 SV=1;tr|Q23YQ6|Q23YQ6_TETTS Cyclin-dependent kinase-like Serine/Threonine kinase family protein OS=Tetrahymena thermophila (strain SB210) OX=312017 GN=TTHERM_0120766	2	1	1	1	3.6	35.252	47922	14965	14186	2396.1	748.24	709.28
tr|Q23YT4|Q23YT4_TETTS	tr|Q23YT4|Q23YT4_TETTS EF-1 guanine nucleotide exchange domain protein OS=Tetrahymena thermophila (strain SB210) OX=312017 GN=TTHERM_00859260 PE=3 SV=2	1	2	2	2	8.6	39.454	197600	59639	65631	12350	3727.4	4101.9
tr|Q23ZD7|Q23ZD7_TETTS	tr|Q23ZD7|Q23ZD7_TETTS Uncharacterized protein OS=Tetrahymena thermophila (strain SB210) OX=312017 GN=TTHERM_00787260 PE=4 SV=1	1	1	1	1	15.5	7.1394	121720	0	32068	30429	0	8017
tr|Q23ZD8|Q23ZD8_TETTS	tr|Q23ZD8|Q23ZD8_TETTS Glutamate dehydrogenase OS=Tetrahymena thermophila (strain SB210) OX=312017 GN=TTHERM_00787250 PE=3 SV=1	1	1	1	1	2.6	55.628	30670	0	2760.6	1179.6	0	106.18
tr|Q241B3|Q241B3_TETTS	tr|Q241B3|Q241B3_TETTS Pyridine nucleotide-disulfide oxidoreductase OS=Tetrahymena thermophila (strain SB210) OX=312017 GN=TTHERM_00622710 PE=4 SV=1	1	1	1	1	2.9	69.669	68280	48576	0	1707	1214.4	0
tr|Q241P0|Q241P0_TETTS	tr|Q241P0|Q241P0_TETTS Calmodulin 1 OS=Tetrahymena thermophila (strain SB210) OX=312017 GN=TTHERM_00630500 PE=4 SV=2	1	1	1	1	8.7	16.808	328260	6537.7	168210	36473	726.41	18690
tr|Q245G5|Q245G5_TETTS	tr|Q245G5|Q245G5_TETTS Cyclin OS=Tetrahymena thermophila (strain SB210) OX=312017 GN=TTHERM_00732460 PE=3 SV=2	1	2	2	2	11.5	22.881	68206	31084	10062	5246.6	2391.1	773.99
tr|Q245W3|Q245W3_TETTS	tr|Q245W3|Q245W3_TETTS ER membrane protein complex subunit 1 OS=Tetrahymena thermophila (strain SB210) OX=312017 GN=TTHERM_00245360 PE=3 SV=2	1	1	1	1	1.5	114.7	9143.6	933.64	0	157.65	16.097	0
tr|Q245Y3|Q245Y3_TETTS	tr|Q245Y3|Q245Y3_TETTS Replication factor C subunit OS=Tetrahymena thermophila (strain SB210) OX=312017 GN=TTHERM_00245150 PE=3 SV=3	1	1	1	1	2.7	42.324	14404	0	0	758.1	0	0
tr|Q245Y8|Q245Y8_TETTS;tr|Q23ZA9|Q23ZA9_TETTS	tr|Q245Y8|Q245Y8_TETTS Na,H/K antiporter P-type ATPase alpha subunit family protein OS=Tetrahymena thermophila (strain SB210) OX=312017 GN=TTHERM_00245100 PE=4 SV=1;tr|Q23ZA9|Q23ZA9_TETTS Na,H/K antiporter P-type ATPase alpha subunit family protein OS=Tetr	2	2	2	2	2.1	134.91	26507	5409.8	0	481.95	98.361	0
tr|Q248F8|Q248F8_TETTS	tr|Q248F8|Q248F8_TETTS Transmembrane protein, putative OS=Tetrahymena thermophila (strain SB210) OX=312017 GN=TTHERM_00532090 PE=4 SV=2	1	4	4	4	14.9	35.08	130490	23413	29211	11863	2128.4	2655.5
tr|Q248K4|Q248K4_TETTS	tr|Q248K4|Q248K4_TETTS Protein phosphatase 2A regulatory B subunit, B56 family protein OS=Tetrahymena thermophila (strain SB210) OX=312017 GN=TTHERM_01266070 PE=4 SV=3	1	3	3	3	6.6	66.124	112840	31200	11653	4906	1356.5	506.64
tr|Q24BQ3|Q24BQ3_TETTS;tr|Q7JQ89|Q7JQ89_TETTH;tr|Q94821|Q94821_TETTH	tr|Q24BQ3|Q24BQ3_TETTS CnjB protein OS=Tetrahymena thermophila (strain SB210) OX=312017 GN=TTHERM_01091290 PE=4 SV=2;tr|Q7JQ89|Q7JQ89_TETTH CnjB protein OS=Tetrahymena thermophila OX=5911 GN=cnjB PE=4 SV=1;tr|Q94821|Q94821_TETTH CnjB gene (Fragment) OS=Tet	3	4	4	4	2.6	199.62	158100	14113	24105	1838.4	164.1	280.29
tr|Q24BQ4|Q24BQ4_TETTS	tr|Q24BQ4|Q24BQ4_TETTS Vacuolar sorting receptor OS=Tetrahymena thermophila (strain SB210) OX=312017 GN=TTHERM_01091280 PE=4 SV=2	1	3	3	3	7.1	53.886	280810	60197	64070	11233	2407.9	2562.8
tr|Q24BW7|Q24BW7_TETTS	tr|Q24BW7|Q24BW7_TETTS Glutamate dehydrogenase OS=Tetrahymena thermophila (strain SB210) OX=312017 GN=TTHERM_01049200 PE=3 SV=2	1	4	4	4	10.6	55.736	330510	169830	82828	11804	6065.4	2958.1
tr|Q24C39|Q24C39_TETTS	tr|Q24C39|Q24C39_TETTS Transmembrane protein, putative OS=Tetrahymena thermophila (strain SB210) OX=312017 GN=TTHERM_00697370 PE=4 SV=1	1	1	1	1	7.2	29.351	3137.1	0	0	209.14	0	0
tr|Q24CH5|Q24CH5_TETTS	tr|Q24CH5|Q24CH5_TETTS PH domain protein OS=Tetrahymena thermophila (strain SB210) OX=312017 GN=TTHERM_00930660 PE=4 SV=2	1	1	1	1	0.7	158.16	3254500	877180	1399900	47166	12713	20288
tr|Q24CY2|Q24CY2_TETTS	tr|Q24CY2|Q24CY2_TETTS Prohibitin OS=Tetrahymena thermophila (strain SB210) OX=312017 GN=TTHERM_00713190 PE=3 SV=2	1	5	5	5	19.6	30.983	13817000	13493000	84653	767630	749640	4702.9
tr|Q24DK2|Q24DK2_TETTS	tr|Q24DK2|Q24DK2_TETTS Thioredoxin family protein OS=Tetrahymena thermophila (strain SB210) OX=312017 GN=TTHERM_00971710 PE=4 SV=2	1	2	2	2	4.6	85.013	86989	52635	13653	2174.7	1315.9	341.31
tr|Q24DL4|Q24DL4_TETTS	tr|Q24DL4|Q24DL4_TETTS Serine/Threonine kinase domain protein OS=Tetrahymena thermophila (strain SB210) OX=312017 GN=TTHERM_00969600 PE=4 SV=2	1	1	1	1	2.1	73.234	13535	6764.3	0	410.16	204.98	0
tr|Q24DM0|Q24DM0_TETTS	tr|Q24DM0|Q24DM0_TETTS Methionyl-tRNA synthetase OS=Tetrahymena thermophila (strain SB210) OX=312017 GN=TTHERM_01145010 PE=3 SV=1	1	7	7	7	10.5	95.627	601510	247540	169580	15423	6347.3	4348.3
tr|Q24E28|Q24E28_TETTS	tr|Q24E28|Q24E28_TETTS Transmembrane protein, putative OS=Tetrahymena thermophila (strain SB210) OX=312017 GN=TTHERM_00853120 PE=4 SV=2	1	7	7	7	20.5	49.467	419220	91683	190200	16124	3526.3	7315.5
tr|Q6U682|Q6U682_TETTH;tr|Q24F10|Q24F10_TETTS	tr|Q6U682|Q6U682_TETTH Catalase OS=Tetrahymena thermophila OX=5911 GN=CAT PE=2 SV=1;tr|Q24F10|Q24F10_TETTS Catalase OS=Tetrahymena thermophila (strain SB210) OX=312017 GN=TTHERM_01146030 PE=3 SV=2	2	9	9	9	24.6	55.201	1587200	273260	201810	61045	10510	7761.9
tr|Q24FD6|Q24FD6_TETTS	tr|Q24FD6|Q24FD6_TETTS DnaJ carboxy-terminal domain protein OS=Tetrahymena thermophila (strain SB210) OX=312017 GN=TTHERM_00865270 PE=4 SV=3	1	6	6	6	18.8	46.59	646770	59550	236350	34041	3134.2	12440
tr|Q24G71|Q24G71_TETTS	tr|Q24G71|Q24G71_TETTS Uncharacterized protein OS=Tetrahymena thermophila (strain SB210) OX=312017 GN=TTHERM_01213940 PE=4 SV=2	1	1	1	1	2.1	88.452	170820	18451	10118	4880.7	527.17	289.08
tr|Q24G77|Q24G77_TETTS	tr|Q24G77|Q24G77_TETTS NACHT domain protein OS=Tetrahymena thermophila (strain SB210) OX=312017 GN=TTHERM_01212890 PE=4 SV=2	1	1	1	1	1.2	111.29	1755000	541290	663270	30790	9496.3	11636
tr|Q24GJ1|Q24GJ1_TETTS	tr|Q24GJ1|Q24GJ1_TETTS Transmembrane protein, putative OS=Tetrahymena thermophila (strain SB210) OX=312017 GN=TTHERM_00725990 PE=4 SV=3	1	1	1	1	2.6	57.959	182160	34937	87255	7286.5	1397.5	3490.2
tr|Q24GJ3|Q24GJ3_TETTS	tr|Q24GJ3|Q24GJ3_TETTS Group 1 family glycosyltransferase OS=Tetrahymena thermophila (strain SB210) OX=312017 GN=TTHERM_00725970 PE=4 SV=2	1	10	10	10	7.5	213.76	447950	211660	52739	4435.1	2095.7	522.17
tr|Q24HH6|Q24HH6_TETTS	tr|Q24HH6|Q24HH6_TETTS Protein kinase OS=Tetrahymena thermophila (strain SB210) OX=312017 GN=TTHERM_01001480 PE=4 SV=3	1	1	1	1	2.1	77.899	22274	0	8356.4	636.39	0	238.75
tr|Q24HK1|Q24HK1_TETTS	tr|Q24HK1|Q24HK1_TETTS Uncharacterized protein OS=Tetrahymena thermophila (strain SB210) OX=312017 GN=TTHERM_01001220 PE=1 SV=3	1	1	1	1	9.1	18.162	10410	2885.7	3652.5	1735	480.94	608.75
tr|Q24HK5|Q24HK5_TETTS	tr|Q24HK5|Q24HK5_TETTS Acyl-CoA synthetase (AMP-forming)/AMP-acid ligase II OS=Tetrahymena thermophila (strain SB210) OX=312017 GN=TTHERM_01000190 PE=4 SV=2	1	2	2	2	7.8	36.667	151390	61305	43907	8410.5	3405.8	2439.3
tr|Q9BME9|Q9BME9_TETTH;tr|Q24HM7|Q24HM7_TETTS	tr|Q9BME9|Q9BME9_TETTH Ndc1 protein OS=Tetrahymena thermophila OX=5911 GN=NDC1 PE=4 SV=1;tr|Q24HM7|Q24HM7_TETTS Ndc1 protein OS=Tetrahymena thermophila (strain SB210) OX=312017 GN=TTHERM_01055600 PE=4 SV=3	2	4	4	4	18.8	44.153	815970	164920	81067	74179	14992	7369.7
tr|Q24HV5|Q24HV5_TETTS	tr|Q24HV5|Q24HV5_TETTS Uncharacterized protein OS=Tetrahymena thermophila (strain SB210) OX=312017 GN=TTHERM_00572190 PE=4 SV=3	1	3	3	3	6.5	67.106	172560	32195	5491.2	5392.6	1006.1	171.6
tr|Q24HY8|Q24HY8_TETTS	tr|Q24HY8|Q24HY8_TETTS ATP synthase subunit alpha OS=Tetrahymena thermophila (strain SB210) OX=312017 GN=TTHERM_00571860 PE=1 SV=2	1	16	16	16	38.3	59.669	9119000	3394700	2781100	303970	113160	92704
tr|Q24I09|Q24I09_TETTS	tr|Q24I09|Q24I09_TETTS Uncharacterized protein OS=Tetrahymena thermophila (strain SB210) OX=312017 GN=TTHERM_00571650 PE=4 SV=1	1	5	5	5	19.6	36.327	748850	247700	178540	41603	13761	9919
tr|Q24I43|Q24I43_TETTS	tr|Q24I43|Q24I43_TETTS Glutathione S-transferase, amine-terminal domain protein OS=Tetrahymena thermophila (strain SB210) OX=312017 GN=TTHERM_00569310 PE=4 SV=1	1	1	1	1	3.8	30.736	43971	17283	26688	2931.4	1152.2	1779.2
tr|Q24I64|Q24I64_TETTS	tr|Q24I64|Q24I64_TETTS Thioredoxin OS=Tetrahymena thermophila (strain SB210) OX=312017 GN=TTHERM_00569100 PE=4 SV=1	1	1	1	1	6.4	23.526	31490	0	0	3149	0	0
tr|Q24IM4|Q24IM4_TETTS	tr|Q24IM4|Q24IM4_TETTS Ribosomal protein L7/L12 carboxy-terminal domain protein OS=Tetrahymena thermophila (strain SB210) OX=312017 GN=TTHERM_00918510 PE=1 SV=2	1	2	2	2	8.6	31.071	45572	0	16029	3505.5	0	1233
tr|Q24IM5|Q24IM5_TETTS	tr|Q24IM5|Q24IM5_TETTS Cytochrome protein c1 OS=Tetrahymena thermophila (strain SB210) OX=312017 GN=TTHERM_00918500 PE=4 SV=2	1	1	1	1	4.1	37.569	102960	28877	28672	5719.9	1604.3	1592.9
tr|Q24JG1|Q24JG1_TETTS	tr|Q24JG1|Q24JG1_TETTS FAD-dependent pyridine nucleotide-disulfide oxidoreductase OS=Tetrahymena thermophila (strain SB210) OX=312017 GN=TTHERM_01513260 PE=4 SV=1	1	1	1	1	2.5	49.352	9369.5	9369.5	0	347.02	347.02	0
tr|Q3S4V5|Q3S4V5_TETTH;tr|I7LW03|I7LW03_TETTS;tr|Q2I2L7|Q2I2L7_TETTH;tr|I7MKW5|I7MKW5_TETTS	tr|Q3S4V5|Q3S4V5_TETTH Granule tip protein 1 OS=Tetrahymena thermophila OX=5911 GN=GRT1 PE=3 SV=1;tr|I7LW03|I7LW03_TETTS Granule tip protein OS=Tetrahymena thermophila (strain SB210) OX=312017 GN=TTHERM_00221120 PE=4 SV=2	4	15	15	15	26.4	85.066	3487000	1000100	486830	96862	27781	13523
tr|Q8WRC0|Q8WRC0_TETTH;tr|Q8WRB1|Q8WRB1_TETTH;tr|Q8WRB7|Q8WRB7_TETTH	tr|Q8WRC0|Q8WRC0_TETTH Tlr 2Fp protein (Fragment) OS=Tetrahymena thermophila OX=5911 PE=4 SV=1;tr|Q8WRB1|Q8WRB1_TETTH Tlr 2Fp protein (Fragment) OS=Tetrahymena thermophila OX=5911 PE=4 SV=1;tr|Q8WRB7|Q8WRB7_TETTH Tlr 2Fp protein OS=Tetrahymena thermophila	3	1	1	1	1.7	58.3	109990	43875	0	4999.4	1994.3	0
tr|Q950Y6|Q950Y6_TETTH	tr|Q950Y6|Q950Y6_TETTH Ymf68 OS=Tetrahymena thermophila OX=5911 GN=ymf68 PE=4 SV=1	1	1	1	1	1.7	72.717	30711	2030	9661.5	1096.8	72.501	345.05
tr|Q950Y9|Q950Y9_TETTH	tr|Q950Y9|Q950Y9_TETTH Cytochrome c oxidase subunit 2 OS=Tetrahymena thermophila OX=5911 GN=cox2 PE=4 SV=1	1	1	1	1	2	72.288	50735	14678	8939.5	1691.2	489.27	297.98
tr|Q951B1|Q951B1_TETTH	tr|Q951B1|Q951B1_TETTH NADH dehydrogenase subunit 7 OS=Tetrahymena thermophila OX=5911 GN=nad7 PE=3 SV=1	1	2	2	2	6.6	51.162	71598	0	25041	3254.5	0	1138.2
tr|W7X248|W7X248_TETTS	tr|W7X248|W7X248_TETTS Transmembrane protein, putative OS=Tetrahymena thermophila (strain SB210) OX=312017 GN=TTHERM_000756448 PE=4 SV=1	1	1	1	1	1.4	76.893	11302	0	0	332.4	0	0
tr|W7X3W3|W7X3W3_TETTS	tr|W7X3W3|W7X3W3_TETTS Transmembrane protein, putative OS=Tetrahymena thermophila (strain SB210) OX=312017 GN=TTHERM_000683401 PE=4 SV=1	1	1	1	1	5.1	31.102	404550	262120	49572	33712	21843	4131
tr|W7X744|W7X744_TETTS	tr|W7X744|W7X744_TETTS Serine/threonine protein phosphatase 2A OS=Tetrahymena thermophila (strain SB210) OX=312017 GN=TTHERM_000088159 PE=4 SV=1	1	3	3	3	17.4	35.28	132770	101110	14364	7810.1	5947.4	844.97
tr|W7X7K1|W7X7K1_TETTS	tr|W7X7K1|W7X7K1_TETTS Kinase domain protein OS=Tetrahymena thermophila (strain SB210) OX=312017 GN=TTHERM_000584709 PE=4 SV=1	1	4	4	4	11.3	53.84	549040	143120	142920	26145	6815.1	6805.6
tr|W7X7Q3|W7X7Q3_TETTS	tr|W7X7Q3|W7X7Q3_TETTS 26S proteasome regulatory complex ATPase RPT2 OS=Tetrahymena thermophila (strain SB210) OX=312017 GN=TTHERM_001014659 PE=3 SV=1	1	7	7	7	23.8	50.858	859910	258330	230610	34396	10333	9224.2
tr|W7X9A6|W7X9A6_TETTS	tr|W7X9A6|W7X9A6_TETTS Sperm-associated antigen 6 OS=Tetrahymena thermophila (strain SB210) OX=312017 GN=TTHERM_000157929 PE=4 SV=1	1	2	2	2	4.7	55.31	51798	7075.8	6713	1992.2	272.15	258.19
tr|W7XBI1|W7XBI1_TETTS	tr|W7XBI1|W7XBI1_TETTS Uncharacterized protein OS=Tetrahymena thermophila (strain SB210) OX=312017 GN=TTHERM_000522989 PE=4 SV=1	1	4	4	4	21.2	25.981	214840	12786	60601	19531	1162.3	5509.2
tr|W7XBY2|W7XBY2_TETTS	tr|W7XBY2|W7XBY2_TETTS Ribonucleoside-diphosphate reductase OS=Tetrahymena thermophila (strain SB210) OX=312017 GN=TTHERM_000028549 PE=3 SV=1	1	5	5	5	6.4	103.62	144690	71688	21491	2679.5	1327.6	397.99
tr|W7XC24|W7XC24_TETTS	tr|W7XC24|W7XC24_TETTS Kinase domain protein OS=Tetrahymena thermophila (strain SB210) OX=312017 GN=TTHERM_000442899 PE=4 SV=1	1	9	9	9	21.5	63.677	1379700	187050	244670	39421	5344.3	6990.7
tr|W7XG48|W7XG48_TETTS	tr|W7XG48|W7XG48_TETTS GNAT family acetyltransferase OS=Tetrahymena thermophila (strain SB210) OX=312017 GN=TTHERM_000242129 PE=3 SV=1	1	1	1	1	7.8	24.262	24794	9356.4	0	1907.2	719.73	0
tr|W7XGH2|W7XGH2_TETTS	tr|W7XGH2|W7XGH2_TETTS RuBisCO LSMT substrate-binding protein OS=Tetrahymena thermophila (strain SB210) OX=312017 GN=TTHERM_001108531 PE=4 SV=1	1	1	1	1	1.6	88.047	296720	87721	107920	7237	2139.5	2632.3
tr|W7XHC8|W7XHC8_TETTS	tr|W7XHC8|W7XHC8_TETTS Protein transporter Sec61 alpha subunit OS=Tetrahymena thermophila (strain SB210) OX=312017 GN=TTHERM_000530789 PE=3 SV=1	1	1	1	1	2.3	53.627	4916.5	0	0	234.12	0	0
tr|W7XJU4|W7XJU4_TETTS	tr|W7XJU4|W7XJU4_TETTS Glutathione S-transferase, amine-terminal domain protein OS=Tetrahymena thermophila (strain SB210) OX=312017 GN=TTHERM_000161459 PE=4 SV=1	1	2	2	2	13.5	27.131	56727	9331.7	17231	5157	848.34	1566.4
tr|W7XJU7|W7XJU7_TETTS	tr|W7XJU7|W7XJU7_TETTS Inhibitor of apoptosis-promoting Bax1 protein OS=Tetrahymena thermophila (strain SB210) OX=312017 GN=TTHERM_000160869 PE=3 SV=1	1	1	1	1	7.1	32.588	18765	3374.6	0	2084.9	374.96	0
tr|W7XKY6|W7XKY6_TETTS	tr|W7XKY6|W7XKY6_TETTS Tricarboxylate transporter OS=Tetrahymena thermophila (strain SB210) OX=312017 GN=TTHERM_000802459 PE=3 SV=1	1	1	1	1	4.5	31.608	168700	49151	37599	9923.4	2891.2	2211.7
tr|X1W3S7|X1W3S7_TETTS	tr|X1W3S7|X1W3S7_TETTS Serine/Threonine kinase domain protein OS=Tetrahymena thermophila (strain SB210) OX=312017 GN=TTHERM_00151488 PE=4 SV=1	1	1	1	1	3.8	61.165	2091500	1674.9	938270	116190	93.05	52126
